# Supplementary material for: The Neurogenic Potential of Astrocytes Is Regulated by Inflammatory Signals
Source: Mol Neurobiol. 2015 Jul 4;53(6):3724–39. doi: 10.1007/s12035-015-9296-x (PMC4937102; doi:10.1007/s12035-015-9296-x)
Supplement: Supplementary file 7 — (XLSX 586 kb) [file 12035_2015_9296_MOESM7_ESM.xlsx]

## Sheet: Differentiation_candidates_0.05
ID	logFC	AveExpr	t	P.Value	adj.P.Val	B	Species	Source	Search_Key	Transcript	ILMN_Gene	Source_Reference_ID	RefSeq_ID	Unigene_ID	Entrez_Gene_ID	GI	Accession	Symbol	Protein_Product	Probe_Id	Array_Address_Id	Probe_Type	Probe_Start	Probe_Sequence	Chromosome	Probe_Chr_Orientation	Probe_Coordinates	Cytoband	Definition	Ontology_Component	Ontology_Process	Ontology_Function	Synonyms	Obsolete_Probe_Id
5960543	2.32827	6.50071	16.7884	2.4667e-08	5.08722e-07	9.15343	Mus musculus	RefSeq	ILMN_210964	ILMN_210964	MMD2	NM_175217.6	NM_175217.6	NA	75104	153791750	NM_175217.6	Mmd2	NP_780426.1	ILMN_1252636	5960543	S	2034	GACAGGGTGCCTTATACTTTGTTCTAGTGCATTCCAAGGTGTTTCAGGGC				5qG2	Mus musculus monocyte to macrophage differentiation-associated 2 (Mmd2), mRNA.	Penetrating at least one phospholipid bilayer of a membrane. May also refer to the state of being buried in the bilayer with no exposure outside the bilayer. When used to describe a protein, indicates that all or part of the peptide sequence is embedded in the membrane [goid 16021] [evidence IEA]; Double layer of lipid molecules that encloses all cells, and, in eukaryotes, many organelles; may be…	The rupture of cell membranes and the loss of cytoplasm [goid 19835] [evidence IEA]	Combining with an extracellular or intracellular messenger to initiate a change in cell activity [goid 4872] [evidence IEA]	C88001; 4930518M15Rik	C88001; 4930518M15Rik
5860358	1.08807	9.80817	10.4599	1.71496e-06	1.65674e-05	4.51086	Mus musculus	RefSeq	ILMN_192050	ILMN_192050	VEGFA	NM_009505.3	NM_009505.3	NA	22339	118130279	NM_009505.3	Vegfa	NP_033531.2	ILMN_2484527	5860358	S	2696	CATCACGTCTTTGTCTCTAGAGCAGTTTTCCGAGATATTCCGTAGTACAT	17	-	46154028-46154077	17qC	Mus musculus vascular endothelial growth factor A (Vegfa), transcript variant 2, mRNA.	Double layer of lipid molecules that encloses all cells, and, in eukaryotes, many organelles; may be a single or double lipid bilayer; also includes associated proteins [goid 16020] [evidence IEA]; All of the contents of a cell excluding the plasma membrane and nucleus, but including other subcellular structures [goid 5737] [evidence IDA]; The space external to the outermost structure of a cell. …	The process whereby relatively unspecialized cells, e.g. embryonic or regenerative cells, acquire specialized structural and/or functional features that characterize the cells, tissues, or organs of the mature organism or some other relatively stable phase of the organism's life history. Differentiation includes the processes involved in commitment of a cell to a specific fate [goid 30154] [evide…	The function that stimulates a cell to grow or proliferate. Most growth factors have other actions besides the induction of cell growth or proliferation [goid 8083] [evidence IEA]; Interacting selectively with heparin, any member of a group of glycosaminoglycans found mainly as an intracellular component of mast cells and which consist predominantly of alternating alpha1-4-linked D-galactose and …	VEGF120; VPF; VEGF-A; Vegf	VEGF120; VPF; VEGF-A; Vegf
630463	1.99675	5.95666	10.3031	1.95658e-06	1.84507e-05	4.36666	Mus musculus	RefSeq	ILMN_186879	ILMN_233848	SGIP1	NM_144906.1	NM_144906.1	NA	73094	21536263	NM_144906.1	Sgip1	NP_659155.1	ILMN_2631934	630463	S	3397	CCAGCCCCTTCTGTGCCGTTTAGCAAATGTGGAGATTGCTAAGTCATCGC	4	+	102643467-102643516	4qC6	Mus musculus SH3-domain GRB2-like (endophilin) interacting protein 1 (Sgip1), mRNA.				gag; 3110007P09Rik; SGIP1alpha	gag; 3110007P09Rik; SGIP1alpha
130369	0.525775	11.1458	10.0757	2.37602e-06	2.17129e-05	4.15421	Mus musculus	RefSeq	ILMN_208901	ILMN_208901	NT5M	NM_134029.2	NM_134029.2	NA	103850	118129938	NM_134029.2	Nt5m	NP_598790.1	ILMN_1216748	130369	S	1214	CTGGTGTTCTTAGATCCCATTAACAGCCCAGAAAGGAGTCAGCAGGTGTG	11	+	59689943-59689992	11qB1.3	Mus musculus 5',3'-nucleotidase, mitochondrial (Nt5m), nuclear gene encoding mitochondrial protein, mRNA.	A semiautonomous, self replicating organelle that occurs in varying numbers, shapes, and sizes in the cytoplasm of virtually all eukaryotic cells. It is notably the site of tissue respiration [goid 5739] [evidence ISO]; A semiautonomous, self replicating organelle that occurs in varying numbers, shapes, and sizes in the cytoplasm of virtually all eukaryotic cells. It is notably the site of tissue…	The chemical reactions and pathways involving a nucleotide, a nucleoside that is esterified with (ortho)phosphate or an oligophosphate at any hydroxyl group on the glycose moiety; may be mono-, di- or triphosphate; this definition includes cyclic nucleotides (nucleoside cyclic phosphates) [goid 9117] [evidence IEA]; The chemical reactions and pathways involving any one of a family of organic mole…	Catalysis of the hydrolysis of various bonds, e.g. C-O, C-N, C-C, phosphoric anhydride bonds, etc. Hydrolase is the systematic name for any enzyme of EC class 3 [goid 16787] [evidence IEA]; Interacting selectively with magnesium (Mg) ions [goid 287] [evidence IEA]; Interacting selectively with a nucleotide, any compound consisting of a nucleoside that is esterified with (ortho)phosphate or an oli…	dNT-2; 2010013E09Rik; AI846937	dNT-2; 2010013E09Rik; AI846937
150543	1.82791	3.93123	9.94987	2.6497e-06	2.38158e-05	4.03498	Mus musculus	RefSeq	ILMN_216010	ILMN_216010	TMEM82	NM_145987.2	NM_145987.2	NA	213989	77020278	NM_145987.2	Tmem82	NP_666099.2	ILMN_2666312	150543	S	1931	GAGATGGACAGCGTCAGCAGACCCACTTTTCTTGGCTGGGCAAGAGGACA	4	-	141170233-141170282	4qE1	Mus musculus transmembrane protein 82 (Tmem82), mRNA.	Penetrating at least one phospholipid bilayer of a membrane. May also refer to the state of being buried in the bilayer with no exposure outside the bilayer. When used to describe a protein, indicates that all or part of the peptide sequence is embedded in the membrane [goid 16021] [evidence IEA]; Double layer of lipid molecules that encloses all cells, and, in eukaryotes, many organelles; may be…			RP23-291H3.2; MGC37938	RP23-291H3.2; MGC37938
6590646	0.649946	10.9836	9.69639	3.31253e-06	2.85499e-05	3.79085	Mus musculus	RefSeq	ILMN_209146	ILMN_209146	TMEM63B	NM_198167.2	NM_198167.2	NA	224807	142376394	NM_198167.2	Tmem63b	NP_937810.1	ILMN_1256171	6590646	S	2474	CCTGATGGCCTCACGGACACAGACTTCCAGTCATGCGAGGACAGCCTCAT	17	-	45797759-45797808	17qB3	Mus musculus transmembrane protein 63b (Tmem63b), mRNA.	Penetrating at least one phospholipid bilayer of a membrane. May also refer to the state of being buried in the bilayer with no exposure outside the bilayer. When used to describe a protein, indicates that all or part of the peptide sequence is embedded in the membrane [goid 16021] [evidence IEA]; Double layer of lipid molecules that encloses all cells, and, in eukaryotes, many organelles; may be…			BC026370	BC026370
2070243	0.715563	9.46421	9.22723	5.07377e-06	4.11036e-05	3.32485	Mus musculus	RefSeq	ILMN_188455	ILMN_246401	ALDH5A1	NM_172532.2	NM_172532.2	NA	214579	142352185	NM_172532.2	Aldh5a1	NP_766120.1	ILMN_2664660	2070243	S	1626	GTACCTAGAGGTCAAGTATGTGTGTTACGGAGGCTTGTAGGGTTCTGCAC	13	-	25003419-25003429:25003430-25003468	13qA3.1	Mus musculus aldhehyde dehydrogenase family 5, subfamily A1 (Aldh5a1), mRNA.	A semiautonomous, self replicating organelle that occurs in varying numbers, shapes, and sizes in the cytoplasm of virtually all eukaryotic cells. It is notably the site of tissue respiration [goid 5739] [evidence IDA]	The process of removal or addition of one or more electrons with or without the concomitant removal or addition of a proton or protons [goid 55114] [evidence IEA]; The chemical reactions and pathways, including anabolism and catabolism, by which living organisms transform chemical substances. Metabolic processes typically transform small molecules, but also include macromolecular processes such a…	Catalysis of an oxidation-reduction (redox) reaction, a reversible chemical reaction in which the oxidation state of an atom or atoms within a molecule is altered. One substrate acts as a hydrogen or electron donor and becomes oxidized, while the other acts as hydrogen or electron acceptor and becomes reduced [goid 16491] [evidence IEA]; Catalysis of an oxidation-reduction (redox) reaction in whi…	Ssdh1; 6330403E24Rik; D630032B01Rik; Ahd-1; Ahd1	Ssdh1; 6330403E24Rik; D630032B01Rik; Ahd-1; Ahd1
7160167	-2.33346	6.4489	-8.95898	6.52691e-06	5.13225e-05	3.04974	Mus musculus	RefSeq	ILMN_213976	ILMN_213976	EMP1	NM_010128.4	NM_010128.4	NA	13730	133892886	NM_010128.4	Emp1	NP_034258.1	ILMN_2642913	7160167	S	2331	TGTTCAAGGTAGGTTACTGAACTGCCGGGCTGATGTTAGAGACACTGGCC	6	+	135332801-135332850	6qG1	Mus musculus epithelial membrane protein 1 (Emp1), mRNA.	Penetrating at least one phospholipid bilayer of a membrane. May also refer to the state of being buried in the bilayer with no exposure outside the bilayer. When used to describe a protein, indicates that all or part of the peptide sequence is embedded in the membrane [goid 16021] [evidence IEA]; Double layer of lipid molecules that encloses all cells, and, in eukaryotes, many organelles; may be…	The process by which a cell irreversibly increases in size over time by accretion and biosynthetic production of matter similar to that already present [goid 16049] [evidence IEA]		TMP	TMP
2480482	0.425835	10.7942	8.77892	7.75574e-06	5.95634e-05	2.86137	Mus musculus	RefSeq	ILMN_188938	ILMN_261671	DLST	NM_030225.3	NM_030225.3	NA	78920	30841024	NM_030225.3	Dlst	NP_084501.1	ILMN_1237507	2480482	S	2449	AATGCTTAAGTGGTTTTGAGCGCTCCTAGGCCTCGTATCCTGCACTGAGC	12	+	86474786-86474835	12qD2	Mus musculus dihydrolipoamide S-succinyltransferase (E2 component of 2-oxo-glutarate complex) (Dlst), mRNA.	A complex of multiple copies of three enzymatic components: oxoglutarate dehydrogenase (lipoamide) ; EC:1.2.4.2 (E1), dihydrolipoamide S-succinyltransferase ; EC:2.3.1.61 (E2) and dihydrolipoamide dehydrogenase ; EC:1.8.1.4 (E3); catalyzes the overall conversion of 2-oxoglutarate to succinyl-CoA and carbon dioxide (CO2) [goid 45252] [evidence IEA]; A semiautonomous, self replicating organelle tha…	A nearly universal metabolic pathway in which the acetyl group of acetyl coenzyme A is effectively oxidized to two CO2 and four pairs of electrons are transferred to coenzymes. The acetyl group combines with oxaloacetate to form citrate, which undergoes successive transformations to isocitrate, 2-oxoglutarate, succinyl-CoA, succinate, fumarate, malate, and oxaloacetate again, thus completing the …	Catalysis of the generalized reaction: acyl-carrier + reactant = acyl-reactant + carrier [goid 8415] [evidence IEA]; Interacting selectively with lipoic acid, 1,2-dithiolane-3-pentanoic acid [goid 31405] [evidence IEA]; Catalysis of the reaction: succinyl-CoA + dihydrolipoamide = CoA + S-succinyldihydrolipoamide [goid 4149] [evidence IEA]; Catalysis of the transfer of a group, e.g. a methyl group…	4930529O08Rik; DLTS; 1600017E01Rik; 4632413C10Rik	4930529O08Rik; DLTS; 1600017E01Rik; 4632413C10Rik
6520739	0.636505	7.99936	8.74303	8.02982e-06	6.14114e-05	2.82346	Mus musculus	RefSeq	ILMN_212893	ILMN_212893	TWF2	NM_011876.3	NM_011876.3	NA	23999	133891654	NM_011876.3	Twf2	NP_036006.1	ILMN_1234388	6520739	S	1356	TGGACCAGCACTGTGTGACCTTGCCCTGTCACTGTCCCTGCCTCTCATCT	9	+	106117480-106117529	9qF1	Mus musculus twinfilin, actin-binding protein, homolog 2 (Drosophila) (Twf2), mRNA.	All of the contents of a cell excluding the plasma membrane and nucleus, but including other subcellular structures [goid 5737] [evidence ISA]; Any of the various filamentous elements that form the internal framework of cells, and typically remain after treatment of the cells with mild detergent to remove membrane constituents and soluble components of the cytoplasm. The term embraces intermediat…	A series of reactions within the cell that occur as a result of a single trigger reaction or compound [goid 7242] [evidence ISA]	Interacting selectively with monomeric or multimeric forms of actin, including actin filaments [goid 3779] [evidence IEA]; Interacting selectively with protein kinase C [goid 5080] [evidence ISA]; Interacting selectively with ATP, adenosine 5'-triphosphate, a universally important coenzyme and enzyme regulator [goid 5524] [evidence ISA]	Ptk9l; Ptk9r; AU014993; A6-related	Ptk9l; Ptk9r; AU014993; A6-related
2850133	-1.48692	7.65514	-8.73925	8.0593e-06	6.16185e-05	2.81945	Mus musculus	RefSeq	ILMN_190210	ILMN_244722	MSN	NM_010833.2	NM_010833.2	NA	17698	70778914	NM_010833.2	Msn	NP_034963.2	ILMN_2694960	2850133	S	2279	GTAGGTTAACAGCTAGCTCCCATCCCTTGCCAGTCCTGTGATTTGCAAAG	X	+	93362331-93362380	XqC3	Mus musculus moesin (Msn), mRNA.	All of the contents of a cell excluding the plasma membrane and nucleus, but including other subcellular structures [goid 5737] [evidence IEA]; Any of the various filamentous elements that form the internal framework of cells, and typically remain after treatment of the cells with mild detergent to remove membrane constituents and soluble components of the cytoplasm. The term embraces intermediat…		The action of a molecule that contributes to the structural integrity of a complex or assembly within or outside a cell [goid 5198] [evidence IEA]; Interacting selectively with any protein component of any cytoskeleton (actin, microtubule, or intermediate filament cytoskeleton) [goid 8092] [evidence IEA]; The selective, often stoichiometric, interaction of a molecule with one or more specific sit…	C78546	C78546
3460670	0.59028	11.4662	8.66114	8.69563e-06	6.56824e-05	2.7365	Mus musculus	RefSeq	ILMN_210014	ILMN_210014	OXCT1	NM_024188.5	NM_024188.5	NA	67041	142378044	NM_024188.5	Oxct1	NP_077150.1	ILMN_1231503	3460670	S	1202	CTCCCAGGAGCCTCTTTCTTCTCCAGCGATGAGTCATTCGCCATGATTAG	15	+	4051147-4051196	15qA1	Mus musculus 3-oxoacid CoA transferase 1 (Oxct1), mRNA.	A semiautonomous, self replicating organelle that occurs in varying numbers, shapes, and sizes in the cytoplasm of virtually all eukaryotic cells. It is notably the site of tissue respiration [goid 5739] [evidence IDA]	The chemical reactions and pathways, including anabolism and catabolism, by which living organisms transform chemical substances. Metabolic processes typically transform small molecules, but also include macromolecular processes such as DNA repair and replication, and protein synthesis and degradation [goid 8152] [evidence IEA]; The chemical reactions and pathways resulting in the breakdown of ke…	Catalysis of the transfer of a group, e.g. a methyl group, glycosyl group, acyl group, phosphorus-containing, or other groups, from one compound (generally regarded as the donor) to another compound (generally regarded as the acceptor). Transferase is the systematic name for any enzyme of EC class 2 [goid 16740] [evidence IEA]; Catalysis of the transfer of a coenzyme A (CoA) group from one compou…	Scot-s; 2610008O03Rik; Oxct; Oxct2a	Scot-s; 2610008O03Rik; Oxct; Oxct2a
3870072	0.836554	6.8649	8.64543	8.83012e-06	6.66591e-05	2.71974	Mus musculus	RefSeq	ILMN_217021	ILMN_217021	MMP2	NM_008610.2	NM_008610.2	NA	17390	47271505	NM_008610.2	Mmp2	NP_032636.1	ILMN_2678218	3870072	S	2815	TCCTGCCCAAAGGACTCGGGTTGTCTGACATCGCTGCATGATGCATCTCA	8	+	95377093-95377142	8qC5	Mus musculus matrix metallopeptidase 2 (Mmp2), mRNA.	The space external to the outermost structure of a cell. For cells without external protective or external encapsulating structures this refers to space outside of the plasma membrane. This term covers the host cell environment outside an intracellular parasite [goid 5576] [evidence IEA]; A layer consisting mainly of proteins (especially collagen) and glycosaminoglycans (mostly as proteoglycans) …	The proteolytic chemical reactions and pathways resulting in the breakdown of collagen in the extracellular matrix, usually carried out by proteases secreted by nearby cells [goid 30574] [evidence IEA]; The hydrolysis of a peptide bond or bonds within a protein [goid 6508] [evidence IEA]; A developmental process, independent of morphogenetic (shape) change, that is required for a blood vessel to …	Interacting selectively with any metal ion [goid 46872] [evidence IEA]; Catalysis of the hydrolysis of various bonds, e.g. C-O, C-N, C-C, phosphoric anhydride bonds, etc. Hydrolase is the systematic name for any enzyme of EC class 3 [goid 16787] [evidence IEA]; Interacting selectively with calcium ions (Ca2+) [goid 5509] [evidence IEA]; Catalysis of the hydrolysis of a peptide bond. A peptide bon…	Clg4a; GelA; MMP-2	Clg4a; GelA; MMP-2
4010544	0.811267	10.1255	8.60726	9.16649e-06	6.89351e-05	2.67894	Mus musculus	RefSeq	ILMN_211792	ILMN_247158	SLC35E3	NM_029875.2	NM_029875.2	NA	215436	37497123	NM_029875.2	Slc35e3	NP_084151.2	ILMN_2619574	4010544	S	3287	GCCCTGGGGACCGGAGTTGATTTGTACTGCGTACAAATCCTAGCTGTAGA	10	-	117170880-117170929	10qD2	Mus musculus solute carrier family 35, member E3 (Slc35e3), mRNA.	Penetrating at least one phospholipid bilayer of a membrane. May also refer to the state of being buried in the bilayer with no exposure outside the bilayer. When used to describe a protein, indicates that all or part of the peptide sequence is embedded in the membrane [goid 16021] [evidence IEA]; Double layer of lipid molecules that encloses all cells, and, in eukaryotes, many organelles; may be…			9330166G04Rik; AI481200	9330166G04Rik; AI481200
1940343	0.910547	8.98288	8.58319	9.38585e-06	7.03378e-05	2.65313	Mus musculus	RefSeq	ILMN_186551	ILMN_186551	VAPB	NM_019806.5	NM_019806.5	NA	56491	86476057	NM_019806.5	Vapb	NP_062780.2	ILMN_2436489	1940343	S	1680	CCCTGAGGAGGAACGCTCTTTTTAATGACAGTCAGCTCTGGATTACCCAG	2	+	173604548-173604597	2qH4	Mus musculus vesicle-associated membrane protein, associated protein B and C (Vapb), mRNA.	Penetrating at least one phospholipid bilayer of a membrane. May also refer to the state of being buried in the bilayer with no exposure outside the bilayer. When used to describe a protein, indicates that all or part of the peptide sequence is embedded in the membrane [goid 16021] [evidence IEA]; Double layer of lipid molecules that encloses all cells, and, in eukaryotes, many organelles; may be…	Any process specifically pertinent to the functioning of integrated living units: cells, tissues, organs, and organisms. A process is a collection of molecular events with a defined beginning and end [goid 8150] [evidence ND ]	Elemental activities, such as catalysis or binding, describing the actions of a gene product at the molecular level. A given gene product may exhibit one or more molecular functions [goid 3674] [evidence ND ]; The action of a molecule that contributes to the structural integrity of a complex or assembly within or outside a cell [goid 5198] [evidence IEA]	D2Abb2e; R75548; AI848259; VAP33b; AI840687; AI225786; Vamp33b	D2Abb2e; R75548; AI848259; VAP33b; AI840687; AI225786; Vamp33b
380187	-0.456535	11.3475	-8.54452	9.75035e-06	7.25405e-05	2.61154	Mus musculus	RefSeq	ILMN_211940	ILMN_211940	CXXC1	NM_028868.3	NM_028868.3	NA	74322	146141090	NM_028868.3	Cxxc1	NP_083144.1	ILMN_2620959	380187	S	2424	CACCGTCTGTCTCCTCTTTCCATAGTCAGGGCTGGGGTGAGACTCAAACT				18qE2	Mus musculus CXXC finger 1 (PHD domain) (Cxxc1), mRNA.	A membrane-bounded organelle of eukaryotic cells in which chromosomes are housed and replicated. In most cells, the nucleus contains all of the cell's chromosomes except the organellar chromosomes, and is the site of RNA synthesis and processing. In some species, or in specialized cell types, RNA metabolism or DNA replication may be absent [goid 5634] [evidence IEA]; The dense fibrillar network l…	Any process that modulates the frequency, rate or extent of DNA-dependent transcription [goid 6355] [evidence IEA]; The synthesis of either RNA on a template of DNA or DNA on a template of RNA [goid 6350] [evidence IEA]	Interacting selectively with zinc (Zn) ions [goid 8270] [evidence IEA]; Interacting selectively with DNA (deoxyribonucleic acid) [goid 3677] [evidence IEA]; Interacting selectively with any metal ion [goid 46872] [evidence IEA]; Interacting selectively with any protein or protein complex (a complex of two or more proteins that may include other nonprotein molecules) [goid 5515] [evidence IEA]	5830420C16Rik; Cgbp; 2410002I16Rik; PHF18; AI426635	5830420C16Rik; Cgbp; 2410002I16Rik; PHF18; AI426635
3130167	0.861193	3.81308	8.51027	1.00861e-05	7.47789e-05	2.57459	Mus musculus	RefSeq	ILMN_222580	ILMN_222580	TDRD12	NM_028034.2	NM_028034.2	NA	71981	130497316	NM_028034.2	Tdrd12	NP_082310.1	ILMN_2751804	3130167	S	1413	CTTAAAGCCAGACTCCTGACGACATGCCAGCCCTTTCCAACACAGAGTGT	7	-	36278787-36278818:36278819-36278836	7qB2	Mus musculus tudor domain containing 12 (Tdrd12), transcript variant 2, mRNA.				ECAT8; 2410070K17Rik	ECAT8; 2410070K17Rik
770059	1.17588	3.72882	8.48142	1.03788e-05	7.66393e-05	2.54338	Mus musculus	RefSeq	ILMN_221364	ILMN_221364	SERPINF2	NM_008878.1	NM_008878.1	NA	18816	6679382	NM_008878.1	Serpinf2	NP_032904.1	ILMN_2769089	770059	S	1916	CATGGTTGGAGGCTGACCTACCCTACAAGAGTGTCCCTTGCTGAAGACAT	11	-	75245444-75245493	11qB5	Mus musculus serine (or cysteine) peptidase inhibitor, clade F, member 2 (Serpinf2), mRNA.	The space external to the outermost structure of a cell. For cells without external protective or external encapsulating structures this refers to space outside of the plasma membrane. This term covers the host cell environment outside an intracellular parasite [goid 5576] [evidence IEA]	Process involving non-antibody proteins whose concentrations in the plasma increase in response to infection or injury of homeothermic animals [goid 6953] [evidence IEA]	Stops, prevents or reduces the activity of an endopeptidase, any enzyme that hydrolyzes nonterminal peptide bonds in polypeptides [goid 4866] [evidence IEA]; Stops, prevents or reduces the activity of serine-type endopeptidases, enzymes that catalyze the hydrolysis of nonterminal peptide bonds in a polypeptide chain; a serine residue (and a histidine residue) are at the active center of the enzym…	Pli; Serpimf2; AI747498	Pli; Serpimf2; AI747498
6550632	0.472756	12.9419	8.25035	1.30877e-05	9.37857e-05	2.29039	Mus musculus	RefSeq	ILMN_212025	ILMN_236379	0910001L09RIK	NM_001081108.1	NM_001081108.1	NA	66096	124487392	NM_001081108.1	0910001L09Rik	NP_001074577.1	ILMN_2621882	6550632	S	448	ACCTTCTGCTGTCCTTGCTGGAGTTGGGCTTGTGCTCACTACCTCCTTCC	5	+	138700443-138700492	5qG2	Mus musculus RIKEN cDNA 0910001L09 gene (0910001L09Rik), mRNA.				AV006840	AV006840
1450537	-1.50902	4.87136	-8.14942	1.45061e-05	0.000102571	2.17818	Mus musculus	RefSeq	ILMN_250418	ILMN_250418	D030074E01RIK	NM_029491.2	NM_029491.2	NA	75964	119964701	NM_029491.2	D030074E01Rik	NP_083767.2	ILMN_3160672	1450537	S	2408	TTGCAGGTATCACGACGCGCCTGACTTCCGGTGCTACCACTCAGTTCACC	18	-	21004891-21004940	18qA2	Mus musculus RIKEN cDNA D030074E01 gene (D030074E01Rik), mRNA.				5033403J15Rik; mKIAA1012; AI845423	5033403J15Rik; mKIAA1012; AI845423
870131	-0.963897	8.12115	-8.01134	1.67257e-05	0.000116162	2.02297	Mus musculus	RefSeq	ILMN_189005	ILMN_225884	MARCH7	NM_020575.2	NM_020575.2	NA	57438	118130502	NM_020575.2	March7	NP_065600.1	ILMN_2711892	870131	S	2524	CCAAGCATTTTTCCTTTTGGTGAGTGGGAAAGCATTACCCTTGTTTGAAA	2	+	60086247-60086296	2qC1.1	Mus musculus membrane-associated ring finger (C3HC4) 7 (March7), mRNA.	The part of a cell or its extracellular environment in which a gene product is located. A gene product may be located in one or more parts of a cell and its location may be as specific as a particular macromolecular complex, that is, a stable, persistent association of macromolecules that function together [goid 5575] [evidence ND ]	Any process specifically pertinent to the functioning of integrated living units: cells, tissues, organs, and organisms. A process is a collection of molecular events with a defined beginning and end [goid 8150] [evidence ND ]; The chemical reactions and pathways resulting in the breakdown of a protein or peptide by hydrolysis of its peptide bonds, initiated by the covalent attachment of a ubiqui…	Interacting selectively with any metal ion [goid 46872] [evidence IEA]; Catalysis of the ligation of two substances with concomitant breaking of a diphosphate linkage, usually in a nucleoside triphosphate. Ligase is the systematic name for any enzyme of EC class 6 [goid 16874] [evidence IEA]; Interacting selectively with zinc (Zn) ions [goid 8270] [evidence IEA]; Elemental activities, such as cat…	Axot; Axo	Axot; Axo
580019	2.79178	4.58933	7.89829	1.88202e-05	0.000129276	1.89439	Mus musculus	RefSeq	ILMN_219973	ILMN_219973	FBXO32	NM_026346.1	NM_026346.1	NA	67731	13385847	NM_026346.1	Fbxo32	NP_080622.1	ILMN_2752994	580019	S	405	AAGGAGAATCTGTTCAGCAGCCTGAACTACGACGTCGCAGCCAAGAAGAG	15	-	58039547-58039596	15qD1	Mus musculus F-box protein 32 (Fbxo32), mRNA.	A membrane-bounded organelle of eukaryotic cells in which chromosomes are housed and replicated. In most cells, the nucleus contains all of the cell's chromosomes except the organellar chromosomes, and is the site of RNA synthesis and processing. In some species, or in specialized cell types, RNA metabolism or DNA replication may be absent [goid 5634] [evidence ISS]	The chemical reactions and pathways resulting in the breakdown of a protein or peptide by hydrolysis of its peptide bonds, initiated by the covalent attachment of a ubiquitin moiety, or multiple ubiquitin moieties, to the protein [goid 6511] [evidence IEA]; Any process specifically pertinent to the functioning of integrated living units: cells, tissues, organs, and organisms. A process is a colle…	Interacting selectively with any protein or protein complex (a complex of two or more proteins that may include other nonprotein molecules) [goid 5515] [evidence IDA]	ATROGIN1; MAFbx; 4833442G10Rik; atrogin-1	ATROGIN1; MAFbx; 4833442G10Rik; atrogin-1
5360670	1.38916	3.84911	7.24352	3.82618e-05	0.000239575	1.12201	Mus musculus	RefSeq	ILMN_221103	ILMN_221103	CYP2B13	NM_007813.1	NM_007813.1	NA	13089	6681104	NM_007813.1	Cyp2b13	NP_031839.1	ILMN_1214531	5360670	S	1592	TTGCTGCTCACATCTTTCCTCCTATTGTGGTTCTCCACAGCTGGAAGGTG	7	+	26880931-26880980	7qA3	Mus musculus cytochrome P450, family 2, subfamily b, polypeptide 13 (Cyp2b13), mRNA.		The process of removal or addition of one or more electrons with or without the concomitant removal or addition of a proton or protons [goid 55114] [evidence IEA]	Interacting selectively with iron (Fe) ions [goid 5506] [evidence IEA]; Interacting selectively with any metal ion [goid 46872] [evidence IEA]; Catalysis of the incorporation of one atom from molecular oxygen into a compound and the reduction of the other atom of oxygen to water [goid 4497] [evidence IEA]; Catalysis of an oxidation-reduction (redox) reaction, a reversible chemical reaction in whi…
1070594	-1.20598	5.71856	-7.07633	4.62071e-05	0.000282144	0.916894	Mus musculus	RefSeq	ILMN_191627	ILMN_242417	WDR37	NM_001039389.1	NM_001039389.1	NA	207615	86476060	NM_001039389.1	Wdr37	NP_001034478.1	ILMN_1235689	1070594	S	361	CTGCCGTCCTCAGTTCGCAGTACACTGCTGGAATTGTTTGGCCAGATAGA	13	-	8856115-8856164	13qA1	Mus musculus WD repeat domain 37 (Wdr37), transcript variant 3, mRNA.				4933417A01Rik; mKIAA0982; AI481191; 3110035P10Rik; 6430603N07	4933417A01Rik; mKIAA0982; AI481191; 3110035P10Rik; 6430603N07
7550520	-1.36565	4.76209	-7.0402	4.81505e-05	0.000292581	0.872126	Mus musculus	RefSeq	ILMN_191820	ILMN_191820	TRIM16	NM_053169.2	NM_053169.2	NA	94092	70778827	NM_053169.2	Trim16	NP_444399.2	ILMN_2482494	7550520	S	1553	TTGGCCTGACCTGCAAAGGCATTGACCGTAAGGGGGAAGAACGGAACAGC	11	+	62654107-62654156	11qB2	Mus musculus tripartite motif-containing 16 (Trim16), mRNA.	The living contents of a cell; the matter contained within (but not including) the plasma membrane, usually taken to exclude large vacuoles and masses of secretory or ingested material. In eukaryotes it includes the nucleus and cytoplasm [goid 5622] [evidence IEA]; All of the contents of a cell excluding the plasma membrane and nucleus, but including other subcellular structures [goid 5737] [evid…	Any process specifically pertinent to the functioning of integrated living units: cells, tissues, organs, and organisms. A process is a collection of molecular events with a defined beginning and end [goid 8150] [evidence ND ]	Interacting selectively with zinc (Zn) ions [goid 8270] [evidence IEA]; Interacting selectively with any metal ion [goid 46872] [evidence IEA]	9130006M08Rik; EBBP; AI482483	EBBP; AI482483; 9130006M08Rik
1110398	1.67701	4.77581	6.9682	5.22935e-05	0.000314851	0.782453	Mus musculus	RefSeq	ILMN_184408	ILMN_184408	ZFP316	NM_017467.2	NM_017467.2	NA	54201	49227201	NM_017467.2	Zfp316	NP_059495.2	ILMN_1218057	1110398	S	4263	TGAGCTCACAGCGCCTTACTATGCAAGGCCCCTTACAGTGGACAGCTAAC	5	-	144013871-144013920	5qG2	Mus musculus zinc finger protein 316 (Zfp316), mRNA.	A membrane-bounded organelle of eukaryotic cells in which chromosomes are housed and replicated. In most cells, the nucleus contains all of the cell's chromosomes except the organellar chromosomes, and is the site of RNA synthesis and processing. In some species, or in specialized cell types, RNA metabolism or DNA replication may be absent [goid 5634] [evidence IEA]; The living contents of a cell…	Any process that modulates the frequency, rate or extent of DNA-dependent transcription [goid 6355] [evidence IEA]; The synthesis of either RNA on a template of DNA or DNA on a template of RNA [goid 6350] [evidence IEA]	Interacting selectively with zinc (Zn) ions [goid 8270] [evidence IEA]; Interacting selectively with DNA (deoxyribonucleic acid) [goid 3677] [evidence IEA]; Interacting selectively with any metal ion [goid 46872] [evidence IEA]; Interacting selectively with any nucleic acid [goid 3676] [evidence IEA]	MZF-3; Emzf1	MZF-3; Emzf1
4290333	1.67748	4.24878	6.85381	5.96955e-05	0.000353293	0.638682	Mus musculus	RefSeq	ILMN_196135	ILMN_230833	LENG8	NM_172736.3	NM_172736.3	NA	232798	118129982	NM_172736.3	Leng8	NP_766324.1	ILMN_2655888	4290333	S	3407	GAGAGGGTCCTCAAAATTAGCGGTACATGTACACTATTAGGGCATCTGAG	7	+	4098088-4098137	7qA1	Mus musculus leukocyte receptor cluster (LRC) member 8 (Leng8), mRNA.				AW049671	AW049671
6200397	0.657269	7.4791	6.82747	6.15567e-05	0.000362887	0.605351	Mus musculus	RefSeq	ILMN_220383	ILMN_220383	LHFPL2	NM_172589.2	NM_172589.2	NA	218454	141803108	NM_172589.2	Lhfpl2	NP_766177.1	ILMN_2721357	6200397	S	4094	GCAGAAGGGTCTTTAGGTGCTGGGAAGGAACTTGGGCACCACTTGATGTC	13	+	94965110-94965159	13qD1	Mus musculus lipoma HMGIC fusion partner-like 2 (Lhfpl2), mRNA.	Penetrating at least one phospholipid bilayer of a membrane. May also refer to the state of being buried in the bilayer with no exposure outside the bilayer. When used to describe a protein, indicates that all or part of the peptide sequence is embedded in the membrane [goid 16021] [evidence IEA]; Double layer of lipid molecules that encloses all cells, and, in eukaryotes, many organelles; may be…			6030465B15; mKIAA0206; AI447312; AW050335	6030465B15; mKIAA0206; AI447312; AW050335
2510201	0.474851	9.04931	6.80601	6.31197e-05	0.000371164	0.578132	Mus musculus	RefSeq	ILMN_216881	ILMN_216881	SMARCD2	NM_031878.1	NM_031878.1	NA	83796	13994210	NM_031878.1	Smarcd2	NP_114084.1	ILMN_1216116	2510201	S	2270	GCTGGAGGACTGCTGTTACCTTTTGCAGTCGGTCTTAAAGAGGATGGGCC	11	-	106124544-106124593	11qE1	Mus musculus SWI/SNF related, matrix associated, actin dependent regulator of chromatin, subfamily d, member 2 (Smarcd2), mRNA.	A membrane-bounded organelle of eukaryotic cells in which chromosomes are housed and replicated. In most cells, the nucleus contains all of the cell's chromosomes except the organellar chromosomes, and is the site of RNA synthesis and processing. In some species, or in specialized cell types, RNA metabolism or DNA replication may be absent [goid 5634] [evidence IEA]	Any process that modulates the frequency, rate or extent of DNA-dependent transcription [goid 6355] [evidence IEA]; The alteration of DNA or protein in chromatin, which may result in changing the chromatin structure [goid 16568] [evidence IEA]; The synthesis of either RNA on a template of DNA or DNA on a template of RNA [goid 6350] [evidence IEA]		Baf60b; AW322457	Baf60b; AW322457
4900142	0.306175	10.4672	6.74279	6.79807e-05	0.000396033	0.497608	Mus musculus	RefSeq	ILMN_211278	ILMN_211278	MAPKAPK2	NM_008551.1	NM_008551.1	NA	17164	45544579	NM_008551.1	Mapkapk2	NP_032577.1	ILMN_2614212	4900142	S	2198	CTTCCTGGATTTCCACCATGTGGTCTGGTGGATGGGACAGTCTTCGCACC	1	-	132950600-132950649	1qE4	Mus musculus MAP kinase-activated protein kinase 2 (Mapkapk2), mRNA.	All of the contents of a cell excluding the plasma membrane and nucleus, but including other subcellular structures [goid 5737] [evidence IDA]; A membrane-bounded organelle of eukaryotic cells in which chromosomes are housed and replicated. In most cells, the nucleus contains all of the cell's chromosomes except the organellar chromosomes, and is the site of RNA synthesis and processing. In some …	Prevention of degradation of mRNA molecules. In the absence of compensating changes in other processes, the slowing of mRNA degradation can result in an overall increase in the population of active mRNA molecules [goid 48255] [evidence IMP]; The process of introducing a phosphate group on to a protein [goid 6468] [evidence IEA]	Catalysis of the reaction: ATP + a protein serine/threonine = ADP + protein serine/threonine phosphate [goid 4674] [evidence IEA]; Catalysis of the transfer of a group, e.g. a methyl group, glycosyl group, acyl group, phosphorus-containing, or other groups, from one compound (generally regarded as the donor) to another compound (generally regarded as the acceptor). Transferase is the systematic n…	MK2; Rps6kc1; AA960234	MK2; Rps6kc1; AA960234
2030315	0.229135	11.389	6.61329	7.9258e-05	0.000454214	0.331098	Mus musculus	RefSeq	ILMN_215119	ILMN_215119	MRPS34	NM_023260.1	NM_023260.1	NA	79044	13385669	NM_023260.1	Mrps34	NP_075749.1	ILMN_2655774	2030315	S	846	GCTTGGTGTCATTTTCAGGCGGGCCCCTCTCTGATTCCTCGGTCTGGAAA	17	+	25032625-25032674	17qA3.3	Mus musculus mitochondrial ribosomal protein S34 (Mrps34), nuclear gene encoding mitochondrial protein, mRNA.	An intracellular organelle, about 200 A in diameter, consisting of RNA and protein. It is the site of protein biosynthesis resulting from translation of messenger RNA (mRNA). It consists of two subunits, one large and one small, each containing only protein and RNA. Both the ribosome and its subunits are characterized by their sedimentation coefficients, expressed in Svedberg units (symbol: S). H…	Any process specifically pertinent to the functioning of integrated living units: cells, tissues, organs, and organisms. A process is a collection of molecular events with a defined beginning and end [goid 8150] [evidence ND ]	Elemental activities, such as catalysis or binding, describing the actions of a gene product at the molecular level. A given gene product may exhibit one or more molecular functions [goid 3674] [evidence ND ]	AV001970; 5330430D13Rik; Tce2; 0610007F04Rik	AV001970; 5330430D13Rik; Tce2; 0610007F04Rik
2480152	0.489819	8.79731	6.50412	9.03506e-05	0.000511509	0.189076	Mus musculus	RefSeq	ILMN_212466	ILMN_212466	RBAK	NM_021326.2	NM_021326.2	NA	57782	113865969	NM_021326.2	Rbak	NP_067301.1	ILMN_2626773	2480152	S	3333	CTGATAGGGAAGTACATAGCTTTCTATGTCGGTGCTTACCCGTAGAGTGG	5	-	143933930-143933979	5qG2	Mus musculus RB-associated KRAB repressor (Rbak), transcript variant 1, mRNA.	A membrane-bounded organelle of eukaryotic cells in which chromosomes are housed and replicated. In most cells, the nucleus contains all of the cell's chromosomes except the organellar chromosomes, and is the site of RNA synthesis and processing. In some species, or in specialized cell types, RNA metabolism or DNA replication may be absent [goid 5634] [evidence IEA]; The living contents of a cell…	Any process that modulates the frequency, rate or extent of DNA-dependent transcription [goid 6355] [evidence IEA]; The synthesis of either RNA on a template of DNA or DNA on a template of RNA [goid 6350] [evidence IEA]	Interacting selectively with any metal ion [goid 46872] [evidence IEA]; Interacting selectively with zinc (Zn) ions [goid 8270] [evidence IEA]; Interacting selectively with any nucleic acid [goid 3676] [evidence IEA]
5050113	-0.828687	6.90022	-6.49548	9.12977e-05	0.000516416	0.177773	Mus musculus	RefSeq	ILMN_211191	ILMN_211191	PDIK1L	NM_146156.2	NM_146156.2	NA	230809	40254185	NM_146156.2	Pdik1l	NP_666268.1	ILMN_1220174	5050113	S	4239	CCTGTTGTCACTTAGAAACATGGGGTTCTGTAGATTCTTGGTGCTAAGGG	4	-	133831251-133831300	4qD3	Mus musculus PDLIM1 interacting kinase 1 like (Pdik1l), mRNA.	A membrane-bounded organelle of eukaryotic cells in which chromosomes are housed and replicated. In most cells, the nucleus contains all of the cell's chromosomes except the organellar chromosomes, and is the site of RNA synthesis and processing. In some species, or in specialized cell types, RNA metabolism or DNA replication may be absent [goid 5634] [evidence IEA]	The process resulting in the physical partitioning and separation of a cell into daughter cells [goid 51301] [evidence IEA]; The process of introducing a phosphate group on to a protein [goid 6468] [evidence IEA]	Catalysis of the transfer of a phosphate group, usually from ATP, to a substrate molecule [goid 16301] [evidence IEA]; Interacting selectively with a nucleotide, any compound consisting of a nucleoside that is esterified with (ortho)phosphate or an oligophosphate at any hydroxyl group on the ribose or deoxyribose moiety [goid 166] [evidence IEA]; Catalysis of the reaction: ATP + a protein serine/…	BC027088; MGC36635	BC027088; MGC36635
1070376	0.380009	11.9171	6.38994	0.000103782	0.000577998	0.0388955	Mus musculus	RefSeq	ILMN_211589	ILMN_211589	NDUFA12	NM_025551.3	NM_025551.3	NA	66414	146135031	NM_025551.3	Ndufa12	NP_079827.2	ILMN_1220362	1070376	S	205	GGCCGCCACCGATGGGTCATCTACACCACCGAGATGAACGGCAAAAACAC				10qC2	Mus musculus NADH dehydrogenase (ubiquinone) 1 alpha subcomplex, 12 (Ndufa12), mRNA.	Double layer of lipid molecules that encloses all cells, and, in eukaryotes, many organelles; may be a single or double lipid bilayer; also includes associated proteins [goid 16020] [evidence IEA]; The inner, i.e. lumen-facing, lipid bilayer of the mitochondrial envelope. It is highly folded to form cristae [goid 5743] [evidence IEA]; The protein complexes that form the mitochondrial electron tra…	The directed movement of substances (such as macromolecules, small molecules, ions) into, out of, within or between cells, or within a multicellular organism [goid 6810] [evidence IEA]; A process whereby a series of electron carriers operate together to transfer electrons from donors to any of several different terminal electron acceptors to generate a transmembrane electrochemical gradient [goid…	Catalysis of the reaction: NADH + H+ + ubiquinone = NAD+ + ubiquinol [goid 8137] [evidence IEA]; Any molecular entity that serves as an electron acceptor and electron donor in an electron transport system [goid 9055] [evidence IEA]; Catalysis of the reaction: NADH + H+ + acceptor = NAD+ + reduced acceptor [goid 3954] [evidence IEA]	MGC7999; 2410011G03Rik; MGC107642; AW112974	MGC7999; 2410011G03Rik; MGC107642; AW112974
2000128	0.308732	11.4633	6.35222	0.000108684	0.000602165	-0.011091	Mus musculus	RefSeq	ILMN_210692	ILMN_210692	DNAJA3	NM_023646.3	NM_023646.3	NA	83945	142350102	NM_023646.3	Dnaja3	NP_076135.2	ILMN_2608238	2000128	S	2397	GGTAGCATGCTGCAGCTTCTGTGTTAAAGGTCCTCTGGAGCTCGTGTAAG	16	+	4707497-4707546	16qA1	Mus musculus DnaJ (Hsp40) homolog, subfamily A, member 3 (Dnaja3), mRNA.	A membrane-bounded organelle of eukaryotic cells in which chromosomes are housed and replicated. In most cells, the nucleus contains all of the cell's chromosomes except the organellar chromosomes, and is the site of RNA synthesis and processing. In some species, or in specialized cell types, RNA metabolism or DNA replication may be absent [goid 5634] [evidence IDA]; That part of the cytoplasm th…	Any series of molecular signals in which a small monomeric GTPase relays one or more of the signals [goid 7264] [evidence IPI]; Progression of the cell from its inception to the end of its lifespan [goid 7569] [evidence IDA]; The specific activation or halting of processes within a cell so that its vital functions markedly cease, rather than simply deteriorating gradually over time, which culmina…	Interacting selectively with zinc (Zn) ions [goid 8270] [evidence IEA]; Modulates the rate of GTP hydrolysis by a small monomeric GTPase [goid 5083] [evidence IPI]; Interacting selectively with any protein or protein complex (a complex of two or more proteins that may include other nonprotein molecules) [goid 5515] [evidence IPI]; Interacting selectively with any metal ion [goid 46872] [evidence …	1810053A11Rik; C81173; Tid1l; Tid-1; 1200003J13Rik	1810053A11Rik; C81173; Tid1l; Tid-1; 1200003J13Rik
6840682	-0.319629	9.23889	-6.23381	0.000125773	0.000686053	-0.169206	Mus musculus	RefSeq	ILMN_186616	ILMN_257719	CRKL	NM_007764.4	NM_007764.4	NA	12929	145966723	NM_007764.4	Crkl	NP_031790.2	ILMN_2621338	6840682	S	3693	GGGTTTCCCTTTTCCCAAGACTGTTGACCAGCAAGACTCTAAGGAATACT				16qA3	Mus musculus v-crk sarcoma virus CT10 oncogene homolog (avian)-like (Crkl), mRNA.		The process whose specific outcome is the progression of the heart over time, from its formation to the mature structure. The heart is a hollow, muscular organ, which, by contracting rhythmically, keeps up the circulation of the blood [goid 7507] [evidence IGI]; The process whose specific outcome is the progression of the thymus over time, from its formation to the mature structure. The thymus is…	Interacting selectively with any protein or protein complex (a complex of two or more proteins that may include other nonprotein molecules) [goid 5515] [evidence IPI]	Crkol; 1110025F07Rik; AA589403; AI325100	Crkol; 1110025F07Rik; AA589403; AI325100
1510433	-1.0085	5.95108	-6.21163	0.000129286	0.000702829	-0.199022	Mus musculus	RefSeq	ILMN_211164	ILMN_211164	INO80C	NM_172625.2	NM_172625.2	NA	225280	142364013	NM_172625.2	Ino80c	NP_766213.1	ILMN_2754015	1510433	S	189	CATGAATGAGAGTAAAATGGCGTCCTCGGAGTTAAGCTCGGGGCCTGTGG	18	-	24272621-24272670	18qA2	Mus musculus INO80 complex subunit C (Ino80c), mRNA.	The part of a cell or its extracellular environment in which a gene product is located. A gene product may be located in one or more parts of a cell and its location may be as specific as a particular macromolecular complex, that is, a stable, persistent association of macromolecules that function together [goid 5575] [evidence ND ]	Any process specifically pertinent to the functioning of integrated living units: cells, tissues, organs, and organisms. A process is a collection of molecular events with a defined beginning and end [goid 8150] [evidence ND ]	Elemental activities, such as catalysis or binding, describing the actions of a gene product at the molecular level. A given gene product may exhibit one or more molecular functions [goid 3674] [evidence ND ]
4730520	0.459558	13.3229	6.15697	0.000138408	0.000748143	-0.272788	Mus musculus	RefSeq	ILMN_217404	ILMN_247252	COX5A	NM_007747.2	NM_007747.2	NA	12858	112181181	NM_007747.2	Cox5a	NP_031773.2	ILMN_2682800	4730520	S	330	GGTTCCTGAGCCCAAAATCATTGATGCTGCATTGCGAGCATGTAGACGGT	9	+	57378076-57378125	9qB	Mus musculus cytochrome c oxidase, subunit Va (Cox5a), nuclear gene encoding mitochondrial protein, mRNA.	Double layer of lipid molecules that encloses all cells, and, in eukaryotes, many organelles; may be a single or double lipid bilayer; also includes associated proteins [goid 16020] [evidence IEA]; A semiautonomous, self replicating organelle that occurs in varying numbers, shapes, and sizes in the cytoplasm of virtually all eukaryotic cells. It is notably the site of tissue respiration [goid 573…		Interacting selectively with iron (Fe) ions [goid 5506] [evidence IEA]; Interacting selectively with any metal ion [goid 46872] [evidence IEA]; Catalysis of the transfer of a solute or solutes from one side of a membrane to the other according to the reaction: 4 ferrocytochrome c + O2 = 4 ferricytochrome c + 2 H2O [goid 4129] [evidence IEA]	CcOX; AA959768	CcOX; AA959768
7210672	0.671515	6.13269	6.14882	0.000139827	0.000755021	-0.283825	Mus musculus	RefSeq	ILMN_211206	ILMN_211206	2010001M09RIK	NM_027222.2	NM_027222.2	NA	69816	141803335	NM_027222.2	2010001M09Rik	NP_081498.1	ILMN_2613601	7210672	S	577	CCTGGCCCAGAGAGAAGAGCTTTAGTCCAACCTGCTGCACTTCTGGATCT	18	-	35807198-35807223:35807224-35807247	18qB2	Mus musculus RIKEN cDNA 2010001M09 gene (2010001M09Rik), mRNA.	All of the contents of a cell excluding the plasma membrane and nucleus, but including other subcellular structures [goid 5737] [evidence IEA]; The space external to the outermost structure of a cell. For cells without external protective or external encapsulating structures this refers to space outside of the plasma membrane. This term covers the host cell environment outside an intracellular pa…	A form of programmed cell death induced by external or internal signals that trigger the activity of proteolytic caspases, whose actions dismantle the cell and result in cell death. Apoptosis begins internally with condensation and subsequent fragmentation of the cell nucleus (blebbing) while the plasma membrane remains intact. Other characteristics of apoptosis include DNA fragmentation and the …		MGC73549; AV064572	MGC73549; AV064572
4920736	0.772731	8.44591	6.1461	0.000140304	0.000757118	-0.287507	Mus musculus	RefSeq	ILMN_212502	ILMN_212502	ANP32A	NM_009672.2	NM_009672.2	NA	11737	40254599	NM_009672.2	Anp32a	NP_033802.2	ILMN_2685507	4920736	S	504	ACCTCGATGGCTATGACAGGGACAACAAGGAGGCCCCCGACTCCGATGTT	9	+	62221395-62221444	9qB	Mus musculus acidic (leucine-rich) nuclear phosphoprotein 32 family, member A (Anp32a), mRNA.	All of the contents of a cell excluding the plasma membrane and nucleus, but including other subcellular structures [goid 5737] [evidence IEA]; A membrane-bounded organelle of eukaryotic cells in which chromosomes are housed and replicated. In most cells, the nucleus contains all of the cell's chromosomes except the organellar chromosomes, and is the site of RNA synthesis and processing. In some …	Any process that modulates the frequency, rate or extent of DNA-dependent transcription [goid 6355] [evidence IEA]; The synthesis of either RNA on a template of DNA or DNA on a template of RNA [goid 6350] [evidence IEA]	Interacting selectively with any protein or protein complex (a complex of two or more proteins that may include other nonprotein molecules) [goid 5515] [evidence IEA]	pp32; W91701; PHAP1; I1PP2A; LANP; Anp32	pp32; W91701; PHAP1; I1PP2A; LANP; Anp32
5290438	0.953761	6.03489	6.14486	0.000140523	0.000757983	-0.289196	Mus musculus	RefSeq	ILMN_218240	ILMN_218240	ELA1	NM_033612.1	NM_033612.1	NA	109901	33239380	NM_033612.1	Ela1	NP_291090.1	ILMN_2693403	5290438	S	844	GTGGCCTCCCCAAGATGGCTCTTAGCTTTGCAATGAGACCTGAAGTAAGC	15	-	100505063-100505112	15qF1	Mus musculus elastase 1, pancreatic (Ela1), mRNA.			Catalysis of the hydrolysis of various bonds, e.g. C-O, C-N, C-C, phosphoric anhydride bonds, etc. Hydrolase is the systematic name for any enzyme of EC class 3 [goid 16787] [evidence IEA]; Catalysis of the hydrolysis of a peptide bond. A peptide bond is a covalent bond formed when the carbon atom from the carboxyl group of one amino acid shares electrons with the nitrogen atom from the amino gro…	1810009A17Rik; 1810062B19Rik; PC-TsF; Ela-1	1810009A17Rik; 1810062B19Rik; PC-TsF; Ela-1
2260398	-0.657501	7.46663	-6.09857	0.000148931	0.000798472	-0.352045	Mus musculus	RefSeq	ILMN_212080	ILMN_212080	ZBTB7C	NM_145356.3	NM_145356.3	NA	207259	47271528	NM_145356.3	Zbtb7c	NP_663331.1	ILMN_2622500	2260398	S	4466	GGACAATCTTCCGTAACTTTGGTCGCACGCTGCATCCTGCCCAGAAATGC	18	+	76308112-76308161	18qE3	Mus musculus zinc finger and BTB domain containing 7C (Zbtb7c), mRNA.	The living contents of a cell; the matter contained within (but not including) the plasma membrane, usually taken to exclude large vacuoles and masses of secretory or ingested material. In eukaryotes it includes the nucleus and cytoplasm [goid 5622] [evidence IEA]	Any process that stops, prevents or reduces the rate or extent of progression through the cell cycle [goid 45786] [evidence IEA]; The progression of biochemical and morphological phases and events that occur in a cell during successive cell replication or nuclear replication events. Canonically, the cell cycle comprises the replication and segregation of genetic material followed by the division …	Interacting selectively with any metal ion [goid 46872] [evidence IEA]; Interacting selectively with zinc (Zn) ions [goid 8270] [evidence IEA]; Interacting selectively with any nucleic acid [goid 3676] [evidence IEA]; Interacting selectively with any protein or protein complex (a complex of two or more proteins that may include other nonprotein molecules) [goid 5515] [evidence IEA]	Zbtb36; B230208J24Rik	Zbtb36; B230208J24Rik
4810341	-0.940852	5.85426	-6.06649	0.000155079	0.000827637	-0.395787	Mus musculus	RefSeq	ILMN_213834	ILMN_241463	FAM149B	NM_001024512.1	NM_001024512.1	NA	105428	67972426	NM_001024512.1	Fam149b	NP_001019683.1	ILMN_2641270	4810341	S	891	AGGGTACCCTCCCATTGCGCCATTTCACTGCATGAAAGAGGATGTTCTTG	14	+	21182539-21182588	14qA3	Mus musculus family with sequence similarity 149, member B (Fam149b), transcript variant 1, mRNA.				mKIAA0974; MGC32264	mKIAA0974; MGC32264
4590180	-0.799826	8.90708	-6.06033	0.000156289	0.000833229	-0.404191	Mus musculus	RefSeq	ILMN_187639	ILMN_187639	ZFP238	NM_013915.3	NM_013915.3	NA	30928	59889573	NM_013915.3	Zfp238	NP_038943.3	ILMN_2445848	4590180	S	3383	GTGTGGCAACTTCTGGTTTTCTGATGGTCCCCAGTGAGAGAAATCTGACA	1	+	179379334-179379383	1qH4	Mus musculus zinc finger protein 238 (Zfp238), transcript variant 2, mRNA.	A membrane-bounded organelle of eukaryotic cells in which chromosomes are housed and replicated. In most cells, the nucleus contains all of the cell's chromosomes except the organellar chromosomes, and is the site of RNA synthesis and processing. In some species, or in specialized cell types, RNA metabolism or DNA replication may be absent [goid 5634] [evidence IEA]; The living contents of a cell…	Any process that modulates the frequency, rate or extent of DNA-dependent transcription [goid 6355] [evidence IEA]; The synthesis of either RNA on a template of DNA or DNA on a template of RNA [goid 6350] [evidence IEA]	Interacting selectively with zinc (Zn) ions [goid 8270] [evidence IEA]; Interacting selectively with DNA (deoxyribonucleic acid) [goid 3677] [evidence IEA]; Interacting selectively with any metal ion [goid 46872] [evidence IEA]; Interacting selectively with any nucleic acid [goid 3676] [evidence IEA]; Interacting selectively with any protein or protein complex (a complex of two or more proteins t…	RP58	RP58
1260075	1.63118	6.66129	6.05846	0.000156659	0.000834854	-0.406746	Mus musculus	RefSeq	ILMN_219304	ILMN_219304	SEC14L2	NM_144520.2	NM_144520.2	NA	67815	118130014	NM_144520.2	Sec14l2	NP_653103.1	ILMN_2707017	1260075	S	2458	CAGCCTGGCCTTGGTTTACAATGCTGTTAGGTACATTAACCAATGAATAA	11	-	3997063-3997112	11qA1	Mus musculus SEC14-like 2 (S. cerevisiae) (Sec14l2), mRNA.	All of the contents of a cell excluding the plasma membrane and nucleus, but including other subcellular structures [goid 5737] [evidence IEA]; A membrane-bounded organelle of eukaryotic cells in which chromosomes are housed and replicated. In most cells, the nucleus contains all of the cell's chromosomes except the organellar chromosomes, and is the site of RNA synthesis and processing. In some …	The directed movement of substances (such as macromolecules, small molecules, ions) into, out of, within or between cells, or within a multicellular organism [goid 6810] [evidence IEA]; Any process that modulates the frequency, rate or extent of DNA-dependent transcription [goid 6355] [evidence IEA]; The synthesis of either RNA on a template of DNA or DNA on a template of RNA [goid 6350] [evidenc…	Interacting selectively with a lipid [goid 8289] [evidence IEA]; Enables the directed movement of substances (such as macromolecules, small molecules, ions) into, out of, within or between cells [goid 5215] [evidence IEA]; Catalysis of the transfer of a protein from one side of a membrane to the other [goid 8320] [evidence ISS]	1300013M05Rik; TAP	1300013M05Rik; TAP
1500411	0.908921	8.91662	6.04088	0.000160183	0.000851692	-0.430796	Mus musculus	RefSeq	ILMN_214326	ILMN_214326	BLMH	NM_178645.3	NM_178645.3	NA	104184	146198820	NM_178645.3	Blmh	NP_848760.1	ILMN_2646878	1500411	S	1875	TTAGGGGAGGGTTAGCTAGGATTTGAACTCTCAACGCTGCATGCTGCCTC				11qB5	Mus musculus bleomycin hydrolase (Blmh), mRNA.	All of the contents of a cell excluding the plasma membrane and nucleus, but including other subcellular structures [goid 5737] [evidence IEA]; That fraction of cells, prepared by disruptive biochemical methods, that is soluble in water [goid 5625] [evidence IDA]	The hydrolysis of a peptide bond or bonds within a protein [goid 6508] [evidence IEA]; A change in state or activity of a cell or an organism (in terms of movement, secretion, enzyme production, gene expression, etc.) as a result of a toxin stimulus [goid 9636] [evidence IMP]; A change in state or activity of a cell or an organism (in terms of movement, secretion, enzyme production, gene expressi…	Catalysis of the hydrolysis of various bonds, e.g. C-O, C-N, C-C, phosphoric anhydride bonds, etc. Hydrolase is the systematic name for any enzyme of EC class 3 [goid 16787] [evidence IEA]; Catalysis of the hydrolysis of peptide bonds in a polypeptide chain by a mechanism in which the sulfhydryl group of a cysteine residue at the active center acts as a nucleophile [goid 8234] [evidence IEA]; Cat…	AI035728; MGC37104; MGC39026; MGC36899; BMH; BH	AI035728; MGC37104; MGC39026; MGC36899; BMH; BH
6420750	0.674935	10.4455	6.03216	0.000161963	0.000860263	-0.442738	Mus musculus	RefSeq	ILMN_221893	ILMN_221893	SALL2	NM_015772.2	NM_015772.2	NA	50524	49087133	NM_015772.2	Sall2	NP_056587.2	ILMN_1240935	6420750	S	4819	GCTTCAAGTGGTTTCCCCCCGTCTCTGTCTTGTAGTGAGATGTAGTATTT	14	-	52931038-52931087	14qC2	Mus musculus sal-like 2 (Drosophila) (Sall2), mRNA.	A membrane-bounded organelle of eukaryotic cells in which chromosomes are housed and replicated. In most cells, the nucleus contains all of the cell's chromosomes except the organellar chromosomes, and is the site of RNA synthesis and processing. In some species, or in specialized cell types, RNA metabolism or DNA replication may be absent [goid 5634] [evidence IEA]; The living contents of a cell…	Any process that modulates the frequency, rate or extent of DNA-dependent transcription [goid 6355] [evidence IEA]; The synthesis of either RNA on a template of DNA or DNA on a template of RNA [goid 6350] [evidence IEA]	Interacting selectively with zinc (Zn) ions [goid 8270] [evidence IEA]; Interacting selectively with DNA (deoxyribonucleic acid) [goid 3677] [evidence IEA]; Interacting selectively with any metal ion [goid 46872] [evidence IEA]	mKIAA0360; AW559097; AI225809; Msal-2; p150(Sal2)	mKIAA0360; AW559097; AI225809; Msal-2; p150(Sal2)
2100358	-0.564779	10.8131	-6.01572	0.000165374	0.000875233	-0.465266	Mus musculus	RefSeq	ILMN_215446	ILMN_215446	MAP2K3	NM_008928.3	NM_008928.3	NA	26397	145966887	NM_008928.3	Map2k3	NP_032954.1	ILMN_2659644	2100358	S	1776	CTCAGACAGCCTCTGGTTACCACCTTTAGTGGTATCTGCCTTTCCCTTTG				11qB2	Mus musculus mitogen activated protein kinase kinase 3 (Map2k3), mRNA.		The immediate defensive reaction (by vertebrate tissue) to infection or injury caused by chemical or physical agents. The process is characterized by local vasodilation, extravasation of plasma into intercellular spaces and accumulation of white blood cells and macrophages [goid 6954] [evidence IMP]; Cascade of at least three protein kinase activities culminating in the phosphorylation and activa…	Catalysis of the transfer of a phosphate group, usually from ATP, to a substrate molecule [goid 16301] [evidence IEA]; Interacting selectively with a nucleotide, any compound consisting of a nucleoside that is esterified with (ortho)phosphate or an oligophosphate at any hydroxyl group on the ribose or deoxyribose moiety [goid 166] [evidence IEA]; Catalysis of the reaction: ATP + a protein serine/…	MEK3; AW212142; mMKK3b; MKK3; Prkmk3	AW212142; MEK3; mMKK3b; MKK3; Prkmk3
6290041	0.445331	12.2122	5.9659	0.0001762	0.000927262	-0.533796	Mus musculus	RefSeq	ILMN_217880	ILMN_217880	NDUFS7	NM_029272.3	NM_029272.3	NA	75406	146141113	NM_029272.3	Ndufs7	NP_083548.1	ILMN_2688763	6290041	S	616	GCCGAAGCACTCCTTTATGGCATCTTGCAGCTGCAACGGAAGATCAAGCG				10qC1	Mus musculus NADH dehydrogenase (ubiquinone) Fe-S protein 7 (Ndufs7), nuclear gene encoding mitochondrial protein, mRNA.	A semiautonomous, self replicating organelle that occurs in varying numbers, shapes, and sizes in the cytoplasm of virtually all eukaryotic cells. It is notably the site of tissue respiration [goid 5739] [evidence IDA]; The inner, i.e. lumen-facing, lipid bilayer of the mitochondrial envelope. It is highly folded to form cristae [goid 5743] [evidence IDA]; The protein complexes that form the mito…	The directed movement of substances (such as macromolecules, small molecules, ions) into, out of, within or between cells, or within a multicellular organism [goid 6810] [evidence IEA]; A process whereby a series of electron carriers operate together to transfer electrons from donors to any of several different terminal electron acceptors to generate a transmembrane electrochemical gradient [goid…	Interacting selectively with a 4 iron, 4 sulfur (4Fe-4S) cluster; this cluster consists of four iron atoms, with the inorganic sulfur atoms found between the irons and acting as bridging ligands [goid 51539] [evidence IEA]; Interacting selectively with an iron-sulfur cluster, a combination of iron and sulfur atoms [goid 51536] [evidence IEA]; Interacting selectively with iron (Fe) ions [goid 5506…	1010001M04Rik	1010001M04Rik
1470681	-0.342063	8.56679	-5.93755	0.000182701	0.000957161	-0.572939	Mus musculus	RefSeq	ILMN_209343	ILMN_209343	MED26	NM_027485.2	NM_027485.2	NA	70625	142350326	NM_027485.2	Med26	NP_081761.1	ILMN_2594899	1470681	S	2782	CTAGGGAAGAGCCGTCTGTTGGCTGGAAACACTCATAACCATTCCTTTAG	8	-	75018625-75018674	8qB3.3	Mus musculus mediator complex subunit 26 (Med26), mRNA.	A membrane-bounded organelle of eukaryotic cells in which chromosomes are housed and replicated. In most cells, the nucleus contains all of the cell's chromosomes except the organellar chromosomes, and is the site of RNA synthesis and processing. In some species, or in specialized cell types, RNA metabolism or DNA replication may be absent [goid 5634] [evidence IEA]; The part of a cell or its ext…	Any process that modulates the frequency, rate or extent of DNA-dependent transcription [goid 6355] [evidence IEA]; The synthesis of either RNA on a template of DNA or DNA on a template of RNA [goid 6350] [evidence IEA]; Any process specifically pertinent to the functioning of integrated living units: cells, tissues, organs, and organisms. A process is a collection of molecular events with a defi…	Interacting selectively with any protein or protein complex (a complex of two or more proteins that may include other nonprotein molecules) [goid 5515] [evidence IPI]; Plays a role in regulating transcription; may bind a promoter or enhancer DNA sequence or interact with a DNA-binding transcription factor [goid 30528] [evidence IEA]; Interacting selectively with DNA (deoxyribonucleic acid) [goid …	AI414941; AW495270; Crsp7; 5730493L18Rik	AI414941; AW495270; Crsp7; 5730493L18Rik
3450370	0.443902	8.27219	5.92823	0.000184895	0.00096747	-0.585832	Mus musculus	RefSeq	ILMN_184505	ILMN_184505	TUFT1	NM_011656.2	NM_011656.2	NA	22156	118130085	NM_011656.2	Tuft1	NP_035786.1	ILMN_2419185	3450370	S	2450	CCTGAGACTTCAGGCAGAACGAGTGGGTTGTACATAATCTCCGTGCCCCT	3	-	94416745-94416794	3qF2.1	Mus musculus tuftelin 1 (Tuft1), mRNA.	The space external to the outermost structure of a cell. For cells without external protective or external encapsulating structures this refers to space outside of the plasma membrane. This term covers the host cell environment outside an intracellular parasite [goid 5576] [evidence IEA]	The formation of bone or of a bony substance, or the conversion of fibrous tissue or of cartilage into bone or a bony substance [goid 1503] [evidence IEA]	Interacting selectively with any protein or protein complex (a complex of two or more proteins that may include other nonprotein molecules) [goid 5515] [evidence IPI]
1580435	-0.607726	7.77126	-5.92775	0.000185009	0.000967872	-0.5865	Mus musculus	RefSeq	ILMN_212994	ILMN_212994	PSMD10	NM_016883.3	NM_016883.3	NA	53380	40254368	NM_016883.3	Psmd10	NP_058579.2	ILMN_1239384	1580435	S	161	GCACTGGGCATGCTCAGCTGGCCATACAGAAATTGTTGAATTCTTGCTGC	X	-	137488355-137488404	XqF1	Mus musculus proteasome (prosome, macropain) 26S subunit, non-ATPase, 10 (Psmd10), mRNA.	Any macromolecular complex composed of two or more polypeptide subunits, which may or may not be identical. Protein complexes may have other associated non-protein prosthetic groups, such as nucleotides, metal ions or carbohydrate groups [goid 43234] [evidence IEA]; That part of the cytoplasm that does not contain membranous or particulate subcellular components [goid 5829] [evidence IEA]			AW554874	AW554874
4200176	0.871645	7.08858	5.87453	0.000198103	0.00102966	-0.660352	Mus musculus	RefSeq	ILMN_220772	ILMN_220772	ZFP3	NM_177565.3	NM_177565.3	NA	193043	83423531	NM_177565.3	Zfp3	NP_808233.1	ILMN_1221886	4200176	S	1709	CGTCCACTGAGTGTGTGCCAGTCGTCGGCCGAAAGTGATGAGGCAGTTTT	11	+	70584924-70584931:70584932-70584973	11qB3	Mus musculus zinc finger protein 3 (Zfp3), mRNA.	The living contents of a cell; the matter contained within (but not including) the plasma membrane, usually taken to exclude large vacuoles and masses of secretory or ingested material. In eukaryotes it includes the nucleus and cytoplasm [goid 5622] [evidence IEA]; A membrane-bounded organelle of eukaryotic cells in which chromosomes are housed and replicated. In most cells, the nucleus contains …	Any process that modulates the frequency, rate or extent of DNA-dependent transcription [goid 6355] [evidence IEA]; The synthesis of either RNA on a template of DNA or DNA on a template of RNA [goid 6350] [evidence IEA]	Interacting selectively with zinc (Zn) ions [goid 8270] [evidence IEA]; Interacting selectively with DNA (deoxyribonucleic acid) [goid 3677] [evidence IEA]; Interacting selectively with any metal ion [goid 46872] [evidence IEA]; Interacting selectively with any nucleic acid [goid 3676] [evidence IEA]	Fnp-1; AI854635; B230309J24; Zfp-3; RP23-326P7.13	Fnp-1; AI854635; B230309J24; Zfp-3; RP23-326P7.13
6580519	1.3776	3.94143	5.8064	0.000216346	0.00111389	-0.75545	Mus musculus	RefSeq	ILMN_218953	ILMN_218953	2310005G13RIK	NM_183281.1	NM_183281.1	NA	69457	34304080	NM_183281.1	2310005G13Rik	NP_899104.1	ILMN_1257831	6580519	S	1197	CTACCGCAGCATTGAAAGCCACGATTGCCCCTACACTGTTAAAGCAGGTG	16	-	57038900-57038949	16qC1.1	Mus musculus RIKEN cDNA 2310005G13 gene (2310005G13Rik), mRNA.
6510445	-0.36077	10.7526	-5.8036	0.000217132	0.00111727	-0.759364	Mus musculus	RefSeq	ILMN_190641	ILMN_224828	PPP1R11	NM_029632.1	NM_029632.1	NA	76497	18390326	NM_029632.1	Ppp1r11	NP_083908.1	ILMN_2757489	6510445	S	334	GACACTGTGGACAATGAGCATATGGGGCGACGCTCGTCGAAATGCTGCTG	17	-	37135179-37135186:37135509-37135550	17qB1	Mus musculus protein phosphatase 1, regulatory (inhibitor) subunit 11 (Ppp1r11), mRNA.			Stops, prevents or reduces the activity of a protein phosphatase, an enzyme that hydrolyzes phosphate groups from proteins [goid 4864] [evidence IDA]	AV117883; 1500041B02Rik; Tctex-5; HCGV; HCG-V; Tctex5; Tcte5	AV117883; 1500041B02Rik; Tctex-5; HCGV; HCG-V; Tctex5; Tcte5
360053	-0.572254	10.2176	-5.70242	0.000247781	0.00125314	-0.901814	Mus musculus	RefSeq	ILMN_210073	ILMN_232024	5033414K04RIK	NM_001003948.1	NM_001003948.1	NA	98496	51556212	NM_001003948.1	5033414K04Rik	NP_001003948.1	ILMN_2601946	360053	S	2256	CAGACAGCAATGGTGTTAGTATTTTTGGTCTGTGTACCCACGTGCCCATG	1	-	84033175-84033224	1qC5	Mus musculus RIKEN cDNA 5033414K04 gene (5033414K04Rik), mRNA.				MGC90850	MGC90850
2900228	0.426571	8.66018	5.67177	0.000257962	0.00129825	-0.945234	Mus musculus	RefSeq	ILMN_220613	ILMN_220613	0610009O20RIK	NM_024179.4	NM_024179.4	NA	66839	142383028	NM_024179.4	0610009O20Rik	NP_077141.2	ILMN_1213681	2900228	S	1911	CTCCTTGCTTAGGTTCCTGAAGACAGACTGGTGCCCACAGTTCCATGGCC	18	+	38421800-38421849	18qB3	Mus musculus RIKEN cDNA 0610009O20 gene (0610009O20Rik), mRNA.			The selective, often stoichiometric, interaction of a molecule with one or more specific sites on another molecule [goid 5488] [evidence IEA]	2700004E22Rik	2700004E22Rik
7570537	0.687578	6.76488	5.5729	0.000294007	0.00145851	-1.08619	Mus musculus	RefSeq	ILMN_223680	ILMN_223680	LMO2	NM_008505.3	NM_008505.3	NA	16909	40254347	NM_008505.3	Lmo2	NP_032531.1	ILMN_2767605	7570537	S	1518	CTGTTTTTAGACACCTTCATTTTGAGGTGAGGCGCCCCACAGATTGTTTC	2	+	103821843-103821892	2qE2	Mus musculus LIM domain only 2 (Lmo2), mRNA.	A membrane-bounded organelle of eukaryotic cells in which chromosomes are housed and replicated. In most cells, the nucleus contains all of the cell's chromosomes except the organellar chromosomes, and is the site of RNA synthesis and processing. In some species, or in specialized cell types, RNA metabolism or DNA replication may be absent [goid 5634] [evidence IDA]; Any macromolecular complex co…	Any process that stops, prevents or reduces the frequency, rate or extent of erythrocyte differentiation [goid 45647] [evidence IMP]	Interacting selectively with any metal ion [goid 46872] [evidence IEA]; Interacting selectively with zinc (Zn) ions [goid 8270] [evidence IEA]; Interacting selectively with any protein or protein complex (a complex of two or more proteins that may include other nonprotein molecules) [goid 5515] [evidence IPI]; Interacting selectively with DNA (deoxyribonucleic acid) [goid 3677] [evidence IDA]	Rbtn2; Rhom-2; Rbtn-2; Ttg2	Rbtn2; Rhom-2; Rbtn-2; Ttg2
3610463	-0.748699	5.66972	-5.56848	0.00029574	0.00146683	-1.09253	Mus musculus	RefSeq	ILMN_218730	ILMN_218730	CCDC66	NM_177111.3	NM_177111.3	NA	320234	118200349	NM_177111.3	Ccdc66	NP_796085.3	ILMN_2699509	3610463	S	2206	GGAGCTGCTTCACTTAGTGGAGAGAAACAATCCCGAGAATCTCTCCCAAA	14	-	28299722-28299771	14qA3	Mus musculus coiled-coil domain containing 66 (Ccdc66), mRNA.				E230015L20Rik	E230015L20Rik
7040653	0.53412	10.1594	5.55175	0.000302401	0.00149611	-1.11652	Mus musculus	RefSeq	ILMN_221594	ILMN_311768	LOC100045882	XM_001475083.1	XM_001475083.1	NA	100045882	149258614	XM_001475083.1	LOC100045882	XP_001475133.1	ILMN_1246390	7040653	S	451	CTCTTCTGACGGTGGGAGAGAGTCAGGATGACTAAAATGTTAAGGGCCCG					PREDICTED: Mus musculus hypothetical protein LOC100045882 (LOC100045882), mRNA.
7040181	0.598238	3.52134	5.53465	0.000309379	0.00152652	-1.14109	Mus musculus	RefSeq	ILMN_223117	ILMN_255541	2410008K03RIK	NM_028022.1	NM_028022.1	NA	71962	58037268	NM_028022.1	2410008K03Rik	NP_082298.1	ILMN_2759563	7040181	S	1427	TTCCTAGCCAGATGAGTTCAGCAGTGCACTCCCTTCGCGGGACTCCGAAG	11	+	4122291-4122340	11qA1	Mus musculus RIKEN cDNA 2410008K03 gene (2410008K03Rik), mRNA.				RP23-453B22.6	RP23-453B22.6
1170491	0.604225	9.33537	5.52997	0.000311319	0.00153432	-1.14782	Mus musculus	RefSeq	ILMN_221890	ILMN_221890	MED16	NM_198107.1	NM_198107.1	NA	216154	37674219	NM_198107.1	Med16	NP_932775.1	ILMN_1213200	1170491	S	2710	TGCGGCATCTCTAGGGCCTGAAGTCCCATGGTCATATCCAAGCCAGTGTG	10	-	79357864-79357913	10qC1	Mus musculus mediator complex subunit 16 (Med16), mRNA.	A protein complex that enables the RNA polymerase II-general RNA polymerase II transcription factor complex to react to transcriptional activator proteins; also enhances the level of basal transcription [goid 119] [evidence IDA]; A membrane-bounded organelle of eukaryotic cells in which chromosomes are housed and replicated. In most cells, the nucleus contains all of the cell's chromosomes except…	Any process that modulates the frequency, rate or extent of DNA-dependent transcription [goid 6355] [evidence IEA]; The synthesis of RNA from a DNA template by RNA polymerase II (Pol II), originating at a Pol II-specific promoter. Includes transcription of messenger RNA (mRNA) and certain small nuclear RNAs (snRNAs) [goid 6366] [evidence IC ]; The synthesis of either RNA on a template of DNA or D…	Combining with an extracellular or intracellular messenger to initiate a change in cell activity [goid 4872] [evidence IEA]	Thrap5; 95kDa; A630083L04; Trap95	Thrap5; 95kDa; A630083L04; Trap95
4730577	0.806081	6.68872	5.48161	0.000332144	0.00162605	-1.21754	Mus musculus	RefSeq	ILMN_219181	ILMN_219181	HIPK2	NM_010433.1	NM_010433.1	NA	15258	6754197	NM_010433.1	Hipk2	NP_034563.1	ILMN_2705324	4730577	S	3617	TATCCAGCCCAGTTTGCCCACCAGACCTATATCAGCGCCTCGCCAGCCTC	6	-	38648194-38648243	6qB1	Mus musculus homeodomain interacting protein kinase 2 (Hipk2), mRNA.	All of the contents of a cell excluding the plasma membrane and nucleus, but including other subcellular structures [goid 5737] [evidence IDA]; A class of nuclear body; they react against SP100 auto-antibodies (PML, promyelocytic leukemia); cells typically contain 10-30 PML bodies per nucleus; alterations in the localization of PML bodies occurs after viral infection [goid 16605] [evidence TAS]; …	Any process that activates or increases the frequency, rate or extent of DNA binding, selective interaction with deoxyribonucleic acid [goid 43388] [evidence IDA]; Any process that activates or increases the frequency, rate or extent of cell death by apoptosis [goid 43065] [evidence NAS]; Any process that stops, prevents or reduces the frequency, rate or extent of cell death by apoptosis in neuro…	Catalysis of the transfer of a phosphate group, usually from ATP, to a substrate molecule [goid 16301] [evidence IEA]; Interacting selectively with any protein or protein complex (a complex of two or more proteins that may include other nonprotein molecules) [goid 5515] [evidence IPI]; Interacting selectively with a nucleotide, any compound consisting of a nucleoside that is esterified with (orth…	Stank; 1110014O20Rik; B230339E18Rik	Stank; 1110014O20Rik; B230339E18Rik
1990730	0.616567	7.98985	5.46509	0.0003396	0.00165875	-1.24143	Mus musculus	RefSeq	ILMN_221725	ILMN_221725	MECR	NM_025297.1	NM_025297.1	NA	26922	13384651	NM_025297.1	Mecr	NP_079573.1	ILMN_2739517	1990730	S	1248	CCATATTGTCTCTTCCTACCAGGAGGGTGGGGGACCAACTCTAGGCTCCC	4	+	131423613-131423662	4qD2.3	Mus musculus mitochondrial trans-2-enoyl-CoA reductase (Mecr), nuclear gene encoding mitochondrial protein, mRNA.	A semiautonomous, self replicating organelle that occurs in varying numbers, shapes, and sizes in the cytoplasm of virtually all eukaryotic cells. It is notably the site of tissue respiration [goid 5739] [evidence IEA]; A membrane-bounded organelle of eukaryotic cells in which chromosomes are housed and replicated. In most cells, the nucleus contains all of the cell's chromosomes except the organ…	The chemical reactions and pathways resulting in the formation of a fatty acid, any of the aliphatic monocarboxylic acids that can be liberated by hydrolysis from naturally occurring fats and oils. Fatty acids are predominantly straight-chain acids of 4 to 24 carbon atoms, which may be saturated or unsaturated; branched fatty acids and hydroxy fatty acids also occur, and very long chain acids of …	Catalysis of an oxidation-reduction (redox) reaction, a reversible chemical reaction in which the oxidation state of an atom or atoms within a molecule is altered. One substrate acts as a hydrogen or electron donor and becomes oxidized, while the other acts as hydrogen or electron acceptor and becomes reduced [goid 16491] [evidence IEA]; Catalysis of a biochemical reaction at physiological temper…	Nrbf1; AI195831	Nrbf1; AI195831
1940300	1.17478	3.81106	5.44878	0.000347136	0.00169106	-1.26506	Mus musculus	RefSeq	ILMN_212276	ILMN_212276	LASS1	NM_138647.2	NM_138647.2	NA	93898	148747122	NM_138647.2	Lass1	NP_619588.1	ILMN_2751386	1940300	S	535	ATGGACAGCTGGCGTAAGGACTCGGTGGTCATGCTGGTGCATCACGTGGT				8qB3.3	Mus musculus LAG1 homolog, ceramide synthase 1 (Lass1), mRNA.	Penetrating at least one phospholipid bilayer of a membrane. May also refer to the state of being buried in the bilayer with no exposure outside the bilayer. When used to describe a protein, indicates that all or part of the peptide sequence is embedded in the membrane [goid 16021] [evidence IEA]; Double layer of lipid molecules that encloses all cells, and, in eukaryotes, many organelles; may be…	The chemical reactions and pathways resulting in the formation of lipids, compounds soluble in an organic solvent but not, or sparingly, in an aqueous solvent [goid 8610] [evidence IEA]; The chemical reactions and pathways resulting in the formation of ceramides, any N-acylated sphingoid [goid 46513] [evidence IDA]	Catalysis of the reaction: acyl-CoA + sphingosine = CoA + N-acylsphingosine. In S. cerevisiae, either dihydrosphingosine (DHS) or phytosphingosine (PHS) can react with C26-fattyacyl-CoA to produce ceramide-I or ceramide-II (also called phytoceramide) respectively. In mammals, DHS is usually acylated with a C18 fatty acid group [goid 50291] [evidence IDA]	Uog-1	Uog-1
1850504	0.209704	10.6449	5.44512	0.000348854	0.00169814	-1.27037	Mus musculus	RefSeq	ILMN_184268	ILMN_234129	AUP1	NM_007517.3	NM_007517.3	NA	11993	90403600	NM_007517.3	Aup1	NP_031543.2	ILMN_2682623	1850504	S	1359	AATGAGCCCAAAGGAACAGGATGGTACCCAGAGCCGCAGGACGGAGACTG	6	+	83007524-83007528:83007529-83007573	6qC3	Mus musculus ancient ubiquitous protein 1 (Aup1), mRNA.		The chemical reactions and pathways, including anabolism and catabolism, by which living organisms transform chemical substances. Metabolic processes typically transform small molecules, but also include macromolecular processes such as DNA repair and replication, and protein synthesis and degradation [goid 8152] [evidence IEA]	Catalysis of the generalized reaction: acyl-carrier + reactant = acyl-reactant + carrier [goid 8415] [evidence IEA]	AA589454	AA589454
4290411	-0.413692	9.06907	-5.4405	0.000351034	0.00170811	-1.27707	Mus musculus	RefSeq	ILMN_210509	ILMN_210509	RIOK3	NM_024182.4	NM_024182.4	NA	66878	142388970	NM_024182.4	Riok3	NP_077144.2	ILMN_1215768	4290411	S	1717	CTTGTGACCCACGTGCCAGATGTGTGCAATTTTTAACTCGGCATTGAAAG	18	+	12313932-12313981	18qA1	Mus musculus RIO kinase 3 (yeast) (Riok3), mRNA.		The process of introducing a phosphate group on to a protein [goid 6468] [evidence IEA]	Catalysis of the reaction: ATP + a protein serine/threonine = ADP + protein serine/threonine phosphate [goid 4674] [evidence IEA]; Catalysis of the transfer of a group, e.g. a methyl group, glycosyl group, acyl group, phosphorus-containing, or other groups, from one compound (generally regarded as the donor) to another compound (generally regarded as the acceptor). Transferase is the systematic n…	Sudd; D18Ertd331e; 1200013N13Rik; E130306C24Rik	Sudd; D18Ertd331e; 1200013N13Rik; E130306C24Rik
5810372	0.995151	6.14321	5.43328	0.000354468	0.00172351	-1.28755	Mus musculus	RefSeq	ILMN_210961	ILMN_210961	ACADS	NM_007383.2	NM_007383.2	NA	11409	31982521	NM_007383.2	Acads	NP_031409.2	ILMN_1256725	5810372	S	1014	CCCGCCTGCTGACCTGGCGTGCTGCCATGTTGAAAGACAACAAGAAACCT	5	-	115561336-115561385	5qF	Mus musculus acyl-Coenzyme A dehydrogenase, short chain (Acads), nuclear gene encoding mitochondrial protein, mRNA.	A semiautonomous, self replicating organelle that occurs in varying numbers, shapes, and sizes in the cytoplasm of virtually all eukaryotic cells. It is notably the site of tissue respiration [goid 5739] [evidence IDA]; A semiautonomous, self replicating organelle that occurs in varying numbers, shapes, and sizes in the cytoplasm of virtually all eukaryotic cells. It is notably the site of tissue…	The chemical reactions and pathways involving fatty acids, aliphatic monocarboxylic acids liberated from naturally occurring fats and oils by hydrolysis [goid 6631] [evidence IEA]; The chemical reactions and pathways involving lipids, compounds soluble in an organic solvent but not, or sparingly, in an aqueous solvent. Includes fatty acids; neutral fats, other fatty-acid esters, and soaps; long-c…	Catalysis of an oxidation-reduction (redox) reaction, a reversible chemical reaction in which the oxidation state of an atom or atoms within a molecule is altered. One substrate acts as a hydrogen or electron donor and becomes oxidized, while the other acts as hydrogen or electron acceptor and becomes reduced [goid 16491] [evidence IEA]; Interacting selectively with FAD, flavin-adenine dinucleoti…	SCAD; Bcd-1; AI196007; Bcd1	SCAD; Bcd-1; AI196007; Bcd1
6980630	1.70085	4.12983	5.38191	0.00037998	0.0018323	-1.36231	Mus musculus	RefSeq	ILMN_222375	ILMN_222375	FHIT	NM_010210.2	NM_010210.2	NA	14198	118197794	NM_010210.2	Fhit	NP_034340.1	ILMN_2748680	6980630	S	832	GCCACTAGTATTATGCTTCCATCACGATGACAAATAGGCTAGCTTCCCAA	14	-	10382713-10382762	14qA1	Mus musculus fragile histidine triad gene (Fhit), mRNA.	All of the contents of a cell excluding the plasma membrane and nucleus, but including other subcellular structures [goid 5737] [evidence IDA]	The chemical reactions and pathways involving a nucleotide, a nucleoside that is esterified with (ortho)phosphate or an oligophosphate at any hydroxyl group on the glycose moiety; may be mono-, di- or triphosphate; this definition includes cyclic nucleotides (nucleoside cyclic phosphates) [goid 9117] [evidence TAS]; The process whereby new strands of DNA are synthesized. The template for replicat…	Catalysis of the reaction: P1-P3-bis(5'-adenosyl) triphosphate + H2O = ADP + AMP [goid 47710] [evidence IDA]; Catalysis of the hydrolysis of various bonds, e.g. C-O, C-N, C-C, phosphoric anhydride bonds, etc. Hydrolase is the systematic name for any enzyme of EC class 3 [goid 16787] [evidence IDA]; Interacting selectively with magnesium (Mg) ions [goid 287] [evidence IEA]; Interacting selectively…	AW045638; Fra14A2	AW045638; Fra14A2
6660093	-0.680682	6.88065	-5.35641	0.000393373	0.00188768	-1.39956	Mus musculus	RefSeq	ILMN_223421	ILMN_223421	SON	NM_019973.2	NM_019973.2	NA	20658	124378036	NM_019973.2	Son	NP_064357.2	ILMN_2763871	6660093	S	6519	GTGAGCAACACGCAGAAGCTCGCCTACAGTTTCGTTTCCATTCACGACGT	16	+	91662796-91662845	16qC3.3	Mus musculus Son DNA binding protein (Son), transcript variant 2, mRNA.	A membrane-bounded organelle of eukaryotic cells in which chromosomes are housed and replicated. In most cells, the nucleus contains all of the cell's chromosomes except the organellar chromosomes, and is the site of RNA synthesis and processing. In some species, or in specialized cell types, RNA metabolism or DNA replication may be absent [goid 5634] [evidence IEA]; The living contents of a cell…		Interacting selectively with an RNA molecule or a portion thereof [goid 3723] [evidence IEA]; Interacting selectively with DNA (deoxyribonucleic acid) [goid 3677] [evidence IEA]; Interacting selectively with double-stranded RNA [goid 3725] [evidence IEA]; Interacting selectively with any nucleic acid [goid 3676] [evidence IEA]; Interacting selectively with an RS domain of a protein; RS domains ar…	AA409051; 2900011L12Rik; C81487; mKIAA1019	AA409051; 2900011L12Rik; C81487; mKIAA1019
2940196	0.437858	8.70991	5.35059	0.000396497	0.00190054	-1.40807	Mus musculus	RefSeq	ILMN_219034	ILMN_219034	NDFIP2	NM_029561.3	NM_029561.3	NA	76273	146141185	NM_029561.3	Ndfip2	NP_083837.1	ILMN_1247636	2940196	S	2218	GCAACACTATGACTAAAAAGTGCATCTAACTCTTCAGGGCTGTTTGTCCC				14qE2.3	Mus musculus Nedd4 family interacting protein 2 (Ndfip2), mRNA.	A compound membranous cytoplasmic organelle of eukaryotic cells, consisting of flattened, ribosome-free vesicles arranged in a more or less regular stack. The Golgi apparatus differs from the endoplasmic reticulum in often having slightly thicker membranes, appearing in sections as a characteristic shallow semicircle so that the convex side (cis or entry face) abuts the endoplasmic reticulum, sec…			9130207N19Rik; mKIAA1165; N4wbp5a; 0710001O20Rik; KIAA1165	9130207N19Rik; mKIAA1165; N4wbp5a; 0710001O20Rik; KIAA1165
1940288	1.16199	3.85618	5.34789	0.000397958	0.00190647	-1.41203	Mus musculus	RefSeq	ILMN_218463	ILMN_218463	D830014E11RIK	NM_177251.3	NM_177251.3	NA	320751	142371498	NM_177251.3	D830014E11Rik	NP_796225.1	ILMN_2696171	1940288	S	2824	GGAGATGTTGACTGTGCTATCGTCCCAGCCGGCTTTTCCTCTCAGTGTTG	5	+	106261299-106261348	5qE5	Mus musculus RIKEN cDNA D830014E11 gene (D830014E11Rik), mRNA.
3940349	1.78411	4.39724	5.3477	0.000398059	0.0019066	-1.4123	Mus musculus	RefSeq	ILMN_215646	ILMN_215646	ABCA1	NM_013454.3	NM_013454.3	NA	11303	90568037	NM_013454.3	Abca1	NP_038482.3	ILMN_1226851	3940349	S	10206	AAGCTTGTTTCTATGTTATGAGTCACAAAATAAAGCTGTGACAGTCCTGC	4	-	53043665-53043714	4qB2	Mus musculus ATP-binding cassette, sub-family A (ABC1), member 1 (Abca1), mRNA.	Penetrating at least one phospholipid bilayer of a membrane. May also refer to the state of being buried in the bilayer with no exposure outside the bilayer. When used to describe a protein, indicates that all or part of the peptide sequence is embedded in the membrane [goid 16021] [evidence IEA]; Double layer of lipid molecules that encloses all cells, and, in eukaryotes, many organelles; may be…	The directed movement of substances (such as macromolecules, small molecules, ions) into, out of, within or between cells, or within a multicellular organism [goid 6810] [evidence IEA]; The directed movement of cholesterol, cholest-5-en-3-beta-ol, out of a cell or organelle [goid 33344] [evidence IMP]; The directed movement of cholesterol, cholest-5-en-3-beta-ol, out of a cell or organelle [goid …	Interacting selectively with ATP, adenosine 5'-triphosphate, a universally important coenzyme and enzyme regulator [goid 5524] [evidence IEA]; Interacting selectively with a nucleotide, any compound consisting of a nucleoside that is esterified with (ortho)phosphate or an oligophosphate at any hydroxyl group on the ribose or deoxyribose moiety [goid 166] [evidence IEA]; Catalysis of the reaction:…	Abc1	Abc1
780133	0.758612	7.29262	5.28844	0.000431609	0.00205314	-1.49928	Mus musculus	RefSeq	ILMN_213671	ILMN_213671	PTGES2	NM_133783.1	NM_133783.1	NA	96979	19526841	NM_133783.1	Ptges2	NP_598544.1	ILMN_2639527	780133	S	1326	TGTTCTGTGGGTAAAGGGTCTGGGGTCTCAAAGGCCTACCCTTCAACCCC	2	+	32258002-32258051	2qB	Mus musculus prostaglandin E synthase 2 (Ptges2), mRNA.	All of the contents of a cell excluding the plasma membrane and nucleus, but including other subcellular structures [goid 5737] [evidence IEA]; A compound membranous cytoplasmic organelle of eukaryotic cells, consisting of flattened, ribosome-free vesicles arranged in a more or less regular stack. The Golgi apparatus differs from the endoplasmic reticulum in often having slightly thicker membrane…	The chemical reactions and pathways resulting in the formation of a fatty acid, any of the aliphatic monocarboxylic acids that can be liberated by hydrolysis from naturally occurring fats and oils. Fatty acids are predominantly straight-chain acids of 4 to 24 carbon atoms, which may be saturated or unsaturated; branched fatty acids and hydroxy fatty acids also occur, and very long chain acids of …	Any transcription regulator activity required for initiation or upregulation of transcription [goid 16563] [evidence IDA]; Catalysis of the reaction: a protein with reduced sulfide groups = a protein with oxidized disulfide bonds [goid 15035] [evidence IEA]; Catalysis of the reaction: (5Z,13E)-(15S)-9-alpha,11-alpha-epidioxy-15-hydroxyprosta-5,13-dienoate = (5Z,13E)-(15S)-11-alpha,15-dihydroxy-9-…	C79137; GBF-1; PGE2; GBF1; MGC6845; 0610038H10Rik	C79137; GBF-1; PGE2; GBF1; MGC6845; 0610038H10Rik
4260722	-0.746978	8.10384	-5.23346	0.000465472	0.00219916	-1.58042	Mus musculus	RefSeq	ILMN_212247	ILMN_212247	USE1	NM_025917.3	NM_025917.3	NA	67023	146134882	NM_025917.3	Use1	NP_080193.1	ILMN_2624385	4260722	S	3	TTCTAAGATGGCGCAGGCGGAAGGAGCCTATCATCGCCCGCTGGCGACGT				8qB3.3	Mus musculus unconventional SNARE in the ER 1 homolog (S. cerevisiae) (Use1), transcript variant 1, mRNA.	Penetrating at least one phospholipid bilayer of a membrane. May also refer to the state of being buried in the bilayer with no exposure outside the bilayer. When used to describe a protein, indicates that all or part of the peptide sequence is embedded in the membrane [goid 16021] [evidence IEA]; Double layer of lipid molecules that encloses all cells, and, in eukaryotes, many organelles; may be…	The chemical reactions and pathways resulting in the breakdown of a protein by the destruction of the native, active configuration, with or without the hydrolysis of peptide bonds [goid 30163] [evidence IMP]; The directed movement of substances (such as macromolecules, small molecules, ions) into, out of, within or between cells, or within a multicellular organism [goid 6810] [evidence IEA]; The …	Interacting selectively with any protein or protein complex (a complex of two or more proteins that may include other nonprotein molecules) [goid 5515] [evidence IPI]	mED2; Q-SNARE; Ed2; AV002165; 5730403H22Rik; D12	mED2; Q-SNARE; Ed2; AV002165; 5730403H22Rik; D12
70730	1.88307	4.25834	5.22082	0.00047365	0.00223451	-1.59912	Mus musculus	RefSeq	ILMN_208628	ILMN_208628	TMEM116	NM_029912.1	NM_029912.1	NA	77462	22296590	NM_029912.1	Tmem116	NP_084188.1	ILMN_2624031	70730	S	667	TGAGCAGTGGGCAGTGATTCACACTGTGGGCCAGCGAGTGCGTTTCTTCC	5	+	121943720-121943769	5qF	Mus musculus transmembrane protein 116 (Tmem116), mRNA.	Penetrating at least one phospholipid bilayer of a membrane. May also refer to the state of being buried in the bilayer with no exposure outside the bilayer. When used to describe a protein, indicates that all or part of the peptide sequence is embedded in the membrane [goid 16021] [evidence IEA]			4930513P12Rik; C030022K24Rik; 4930406A18Rik	4930513P12Rik; C030022K24Rik; 4930406A18Rik
4780673	0.485909	8.24004	5.19933	0.000487922	0.002293	-1.631	Mus musculus	RefSeq	ILMN_191013	ILMN_261717	SLC30A1	NM_009579.3	NM_009579.3	NA	22782	84490410	NM_009579.3	Slc30a1	NP_033605.1	ILMN_1224883	4780673	S	1805	ATACTAAGTTTGCCAAGTAGTGTAATTGAAGTCCTTGTCTGGTCGCACAG	1	+	193733701-193733750	1qH6	Mus musculus solute carrier family 30 (zinc transporter), member 1 (Slc30a1), mRNA.	Double layer of lipid molecules that encloses all cells, and, in eukaryotes, many organelles; may be a single or double lipid bilayer; also includes associated proteins [goid 16020] [evidence IEA]; Penetrating at least one phospholipid bilayer of a membrane. May also refer to the state of being buried in the bilayer with no exposure outside the bilayer. When used to describe a protein, indicates …	The directed movement of charged atoms or small charged molecules into, out of, within or between cells [goid 6811] [evidence IEA]; The directed movement of cations, atoms or small molecules with a net positive charge, into, out of, within or between cells [goid 6812] [evidence IEA]; The regulation of the levels, transport, and metabolism of zinc ions within a cell or between a cell and its exter…	Interacting selectively with zinc (Zn) ions [goid 8270] [evidence IEA]; Catalysis of the transfer of cation from one side of the membrane to the other [goid 8324] [evidence IEA]; Catalysis of the transfer of zinc (Zn) ions from one side of a membrane to the other [goid 5385] [evidence ISO]	C130040I11Rik; Znt1; AI839647	C130040I11Rik; Znt1; AI839647
4180379	0.406593	11.3333	5.15097	0.000521744	0.0024337	-1.70294	Mus musculus	RefSeq	ILMN_209531	ILMN_209531	NDUFS2	NM_153064.4	NM_153064.4	NA	226646	142376353	NM_153064.4	Ndufs2	NP_694704.1	ILMN_2704165	4180379	S	728	ACCTACCTCTTGGGCTTCTGGATGACATTTATGAGTTTTCCAAGAACTTC	1	-	173168672-173168721	1qH3	Mus musculus NADH dehydrogenase (ubiquinone) Fe-S protein 2 (Ndufs2), mRNA.	Double layer of lipid molecules that encloses all cells, and, in eukaryotes, many organelles; may be a single or double lipid bilayer; also includes associated proteins [goid 16020] [evidence IEA]; The inner, i.e. lumen-facing, lipid bilayer of the mitochondrial envelope. It is highly folded to form cristae [goid 5743] [evidence IEA]; The protein complexes that form the mitochondrial electron tra…	The directed movement of substances (such as macromolecules, small molecules, ions) into, out of, within or between cells, or within a multicellular organism [goid 6810] [evidence IEA]; Any process specifically pertinent to the functioning of integrated living units: cells, tissues, organs, and organisms. A process is a collection of molecular events with a defined beginning and end [goid 8150] […	Interacting selectively with a 4 iron, 4 sulfur (4Fe-4S) cluster; this cluster consists of four iron atoms, with the inorganic sulfur atoms found between the irons and acting as bridging ligands [goid 51539] [evidence IEA]; Interacting selectively with an iron-sulfur cluster, a combination of iron and sulfur atoms [goid 51536] [evidence IEA]; Interacting selectively with iron (Fe) ions [goid 5506…	MGC27667; AL033311	MGC27667; AL033311
4900133	0.691859	6.66686	5.13285	0.000535059	0.00248903	-1.72998	Mus musculus	RefSeq	ILMN_208930	ILMN_208930	ABCB8	NM_029020.2	NM_029020.2	NA	74610	27753994	NM_029020.2	Abcb8	NP_083296.2	ILMN_2663015	4900133	S	2287	CCACCGGCTTAGTACTGTCCGTGCAGCCCACTCCATCATTGTCATGGCCA	5	+	23914570-23914619	5qA3	Mus musculus ATP-binding cassette, sub-family B (MDR/TAP), member 8 (Abcb8), nuclear gene encoding mitochondrial protein, mRNA.			Interacting selectively with ATP, adenosine 5'-triphosphate, a universally important coenzyme and enzyme regulator [goid 5524] [evidence IEA]; Interacting selectively with a nucleotide, any compound consisting of a nucleoside that is esterified with (ortho)phosphate or an oligophosphate at any hydroxyl group on the ribose or deoxyribose moiety [goid 166] [evidence IEA]	AA409895; 4833412N02Rik	AA409895; 4833412N02Rik
6420450	1.10938	5.38003	5.12544	0.000540604	0.00251119	-1.74104	Mus musculus	RefSeq	ILMN_216404	ILMN_216404	NFKBIE	NM_008690.3	NM_008690.3	NA	18037	118130686	NM_008690.3	Nfkbie	NP_032716.2	ILMN_2690551	6420450	S	2082	CAAGCACAGGGCCTTGCTGGGTATGGTAGGAGACCTAAGTGGTTCCTGCC	17	+	45699778-45699827	17qB3	Mus musculus nuclear factor of kappa light polypeptide gene enhancer in B-cells inhibitor, epsilon (Nfkbie), mRNA.	All of the contents of a cell excluding the plasma membrane and nucleus, but including other subcellular structures [goid 5737] [evidence IEA]		Interacting selectively with any protein or protein complex (a complex of two or more proteins that may include other nonprotein molecules) [goid 5515] [evidence ISO]; Any transcription regulator activity that prevents or downregulates transcription [goid 16564] [evidence RCA]	IKBE	IKBE
4040674	-1.63145	4.12317	-5.11075	0.000551793	0.00255854	-1.76301	Mus musculus	RefSeq	ILMN_217105	ILMN_217105	VSTM2B	NM_021387.3	NM_021387.3	NA	58188	146135042	NM_021387.3	Vstm2b	NP_067362.1	ILMN_1251276	4040674	S	1187	CCCTCTGAATCTTCATTTTGCACGAACTCTTGAGCAAGTCCCTTGAGGAT				7qB3	Mus musculus V-set and transmembrane domain containing 2B (Vstm2b), mRNA.	Penetrating at least one phospholipid bilayer of a membrane. May also refer to the state of being buried in the bilayer with no exposure outside the bilayer. When used to describe a protein, indicates that all or part of the peptide sequence is embedded in the membrane [goid 16021] [evidence IEA]; Double layer of lipid molecules that encloses all cells, and, in eukaryotes, many organelles; may be…			AB030198	AB030198
2760403	0.918738	4.03527	5.09081	0.000567376	0.00262369	-1.79288	Mus musculus	RefSeq	ILMN_210046	ILMN_210046	ACR	NM_013455.2	NM_013455.2	NA	11434	114205397	NM_013455.2	Acr	NP_038483.1	ILMN_1224629	2760403	S	1168	AGGCACCGCACAACGCTGTCTTTTGCTCGGCGTCTCCAGCGCCTCATAGA	15	+	89404680-89404729	15qE3	Mus musculus acrosin prepropeptide (Acr), mRNA.	A structural framework, or 'dense core' at the interior of an acrosome. May regulate the distribution of hydrolases within the acrosome and their release during the acrosome reaction [goid 43159] [evidence TAS]; A structure in the head of a spermatozoon that contains acid hydrolases, and is concerned with the breakdown of the outer membrane of the ovum during fertilization. It lies just beneath t…	The hydrolysis of a peptide bond or bonds within a protein [goid 6508] [evidence IEA]; The infiltration by sperm of the zona pellucida to reach the oocyte. The process involves digestive enzymes from a modified lysosome called the acrosome, situated at the head of the sperm [goid 7341] [evidence IMP]; The infiltration by sperm of the zona pellucida to reach the oocyte. The process involves digest…	Catalysis of the hydrolysis of various bonds, e.g. C-O, C-N, C-C, phosphoric anhydride bonds, etc. Hydrolase is the systematic name for any enzyme of EC class 3 [goid 16787] [evidence IEA]; Catalysis of the hydrolysis of internal, alpha-peptide bonds in a polypeptide chain by a catalytic mechanism that involves a catalytic triad consisting of a serine nucleophile that is activated by a proton rel…	AI323726; MGC124043	AI323726; MGC124043
6350687	-0.777994	9.28253	-5.0658	0.000587588	0.00270353	-1.83042	Mus musculus	RefSeq	ILMN_216237	ILMN_216237	SCHIP1	NM_013928.4	NM_013928.4	NA	30953	148277019	NM_013928.4	Schip1	NP_038956.2	ILMN_1244514	6350687	S	881	GCTCCTTATTCGAGATGAGCTGCACACAGAACAAGATGCCATGCTGGTGG				3qE1	Mus musculus schwannomin interacting protein 1 (Schip1), mRNA.	All of the contents of a cell excluding the plasma membrane and nucleus, but including other subcellular structures [goid 5737] [evidence ISA]		Interacting selectively with any protein or protein complex (a complex of two or more proteins that may include other nonprotein molecules) [goid 5515] [evidence IPI]; Interacting selectively with an identical protein to form a homodimer [goid 42803] [evidence ISA]	SCHIP-1; Nf2ip	SCHIP-1; Nf2ip
4010056	-0.658987	6.55978	-5.05598	0.000595737	0.00273662	-1.84518	Mus musculus	RefSeq	ILMN_184848	ILMN_241754	PDGFC	NM_019971.2	NM_019971.2	NA	54635	31560372	NM_019971.2	Pdgfc	NP_064355.1	ILMN_2753912	4010056	S	3166	GGGAAATAGGAGTATAGCTCAGAGAAGCACGTCCCCAGAAACCTCGACCA	3	+	81017607-81017656	3qE3	Mus musculus platelet-derived growth factor, C polypeptide (Pdgfc), mRNA.	The space external to the outermost structure of a cell. For cells without external protective or external encapsulating structures this refers to space outside of the plasma membrane. This term covers the host cell environment outside an intracellular parasite [goid 5576] [evidence IDA]; All of the contents of a cell excluding the plasma membrane and nucleus, but including other subcellular stru…	Any process that activates or increases the rate or extent of cell proliferation [goid 8284] [evidence IDA]; Any process that initiates the activity of the inactive transmembrane receptor protein tyrosine kinase activity [goid 7171] [evidence IDA]; The series of molecular signals generated as a consequence of a platelet-derived growth factor receptor binding to one of its physiological ligands [g…	Interacting selectively with the platelet-derived growth factor receptor [goid 5161] [evidence IDA]; The function that stimulates a cell to grow or proliferate. Most growth factors have other actions besides the induction of cell growth or proliferation [goid 8083] [evidence IEA]	PDGF-C; AI647969; 1110064L01Rik	PDGF-C; AI647969; 1110064L01Rik
4250056	-0.915156	6.87657	-5.05358	0.000597748	0.00274537	-1.84879	Mus musculus	RefSeq	ILMN_196165	ILMN_253387	NUP155	NM_133227.2	NM_133227.2	NA	170762	31559997	NM_133227.2	Nup155	NP_573490.2	ILMN_2695281	4250056	S	5179	ACCACAGCTCTACAGGGACTACTGTTTCCTTAGAACCCTCACTGTCTAAC	15	+	8108681-8108730	15qA1	Mus musculus nucleoporin 155 (Nup155), mRNA.	Any of the numerous similar discrete openings in the nuclear envelope of a eukaryotic cell, where the inner and outer nuclear membranes are joined [goid 5643] [evidence IEA]; A membrane-bounded organelle of eukaryotic cells in which chromosomes are housed and replicated. In most cells, the nucleus contains all of the cell's chromosomes except the organellar chromosomes, and is the site of RNA syn…	The directed movement of substances (such as macromolecules, small molecules, ions) into, out of, within or between cells, or within a multicellular organism [goid 6810] [evidence IEA]; The directed movement of proteins in a cell, from one side of a membrane to another [goid 65002] [evidence IEA]; The directed movement of proteins into, out of, within or between cells [goid 15031] [evidence IEA];…	The action of a molecule that contributes to the structural integrity of the nuclear pore complex [goid 17056] [evidence IEA]	D930027M19Rik; mKIAA0791	D930027M19Rik; mKIAA0791
1980072	-1.05465	6.35143	-5.05011	0.000600663	0.00275728	-1.85401	Mus musculus	RefSeq	ILMN_184862	ILMN_228494	SEC23A	NM_009147.2	NM_009147.2	NA	20334	67906176	NM_009147.2	Sec23a	NP_033173.2	ILMN_1213958	1980072	S	1806	GAGGAAGGGCCAGACGTGCTAAGATGGTTGGACAGACAACTCATTCGACT	12	-	60079449-60079498	12qC1	Mus musculus SEC23A (S. cerevisiae) (Sec23a), mRNA.	A compound membranous cytoplasmic organelle of eukaryotic cells, consisting of flattened, ribosome-free vesicles arranged in a more or less regular stack. The Golgi apparatus differs from the endoplasmic reticulum in often having slightly thicker membranes, appearing in sections as a characteristic shallow semicircle so that the convex side (cis or entry face) abuts the endoplasmic reticulum, sec…	The directed movement of substances (such as macromolecules, small molecules, ions) into, out of, within or between cells, or within a multicellular organism [goid 6810] [evidence IEA]; The directed movement of proteins into, out of, within or between cells [goid 15031] [evidence IEA]; The directed movement of substances, either within a vesicle or in the vesicle membrane, into, out of or within …	Interacting selectively with any protein or protein complex (a complex of two or more proteins that may include other nonprotein molecules) [goid 5515] [evidence IEA]; Interacting selectively with zinc (Zn) ions [goid 8270] [evidence IEA]	Msec23; Sec23r	Msec23; Sec23r
2320136	0.28308	12.6994	5.0464	0.000603802	0.00276921	-1.8596	Mus musculus	RefSeq	ILMN_212836	ILMN_212836	PRKAR1A	NM_021880.2	NM_021880.2	NA	19084	142364451	NM_021880.2	Prkar1a	NP_068680.1	ILMN_1235481	2320136	S	3120	CTGTGTCTTTGTGGACTCTTGGCACCATTGTCTCTGGATGGGTGGGCGAA	11	+	109530759-109530808	11qE1	Mus musculus protein kinase, cAMP dependent regulatory, type I, alpha (Prkar1a), mRNA.	The junction between the axon of a motor neuron and a muscle fiber. In response to the arrival of action potentials, the presynaptic button releases molecules of neurotransmitters into the synaptic cleft. These diffuse across the cleft and transmit the signal to the postsynaptic membrane of the muscle fiber, leading to a post-synaptic potential responsible of the muscle contraction [goid 31594] […	The cascade of processes by which a signal interacts with a receptor, causing a change in the level or activity of a second messenger or other downstream target, and ultimately effecting a change in the functioning of the cell [goid 7165] [evidence IEA]; Any process that modulates the frequency, rate or extent of addition of phosphate groups into an amino acid in a protein [goid 1932] [evidence I…	Interacting selectively with cAMP, the nucleotide cyclic AMP (adenosine 3',5'-cyclophosphate) [goid 30552] [evidence IEA]; Catalysis of the transfer of a phosphate group, usually from ATP, to a substrate molecule [goid 16301] [evidence IEA]; Interacting selectively with a nucleotide, any compound consisting of a nucleoside that is esterified with (ortho)phosphate or an oligophosphate at any hydro…	1300018C22Rik; RIalpha; Tse-1; Tse1	1300018C22Rik; RIalpha; Tse-1; Tse1
5690609	0.394125	8.32507	4.99238	0.000651529	0.00296325	-1.94112	Mus musculus	RefSeq	ILMN_217013	ILMN_217013	RNF144A	NM_080563.3	NM_080563.3	NA	108089	126517495	NM_080563.3	Rnf144a	NP_542130.1	ILMN_2678127	5690609	S	4734	TGTATAAAACAAAAATGCATGTGTCGGTCATGCGCACGTGCACACGTAGA	12	-	26991967-26992016	12qA2	Mus musculus ring finger protein 144A (Rnf144a), transcript variant 2, mRNA.	Penetrating at least one phospholipid bilayer of a membrane. May also refer to the state of being buried in the bilayer with no exposure outside the bilayer. When used to describe a protein, indicates that all or part of the peptide sequence is embedded in the membrane [goid 16021] [evidence IEA]; Double layer of lipid molecules that encloses all cells, and, in eukaryotes, many organelles; may be…	The chemical reactions and pathways resulting in the breakdown of a protein or peptide by hydrolysis of its peptide bonds, initiated by the covalent attachment of a ubiquitin moiety, or multiple ubiquitin moieties, to the protein [goid 6511] [evidence IEA]	Interacting selectively with zinc (Zn) ions [goid 8270] [evidence IEA]; Interacting selectively with any metal ion [goid 46872] [evidence IEA]; Catalysis of the ligation of two substances with concomitant breaking of a diphosphate linkage, usually in a nucleoside triphosphate. Ligase is the systematic name for any enzyme of EC class 6 [goid 16874] [evidence IEA]; Interacting selectively with any …	AI316797; Ubce7ip4; UIP4	AI316797; Ubce7ip4; UIP4
3520689	0.568818	7.74808	4.99186	0.000652008	0.00296438	-1.9419	Mus musculus	RefSeq	ILMN_188631	ILMN_230099	9030612M13RIK	NM_172458.3	NM_172458.3	NA	208292	140969611	NM_172458.3	9030612M13Rik	NP_766046.3	ILMN_2729447	3520689	S	2919	GAGCATCTTCTGCTCCTTCCAAAGGACATTGAGTTGGCCTTTAAGAGCAT	17	-	32910323-32910372	17qB1	Mus musculus RIKEN cDNA 9030612M13 gene (9030612M13Rik), mRNA.			Interacting selectively with any metal ion [goid 46872] [evidence IEA]; Interacting selectively with zinc (Zn) ions [goid 8270] [evidence IEA]	4732483N19; AI118577; mKIAA3006	4732483N19; AI118577; mKIAA3006
6770670	2.36451	4.28932	4.98913	0.000654529	0.00297426	-1.94604	Mus musculus	RefSeq	ILMN_187712	ILMN_251259	TNR	NM_022312.2	NM_022312.2	NA	21960	141802380	NM_022312.2	Tnr	NP_071707.1	ILMN_1252176	6770670	S	4586	GGAAAGGCCATGAATTCTCCATCCCCTTTGTAGAAATGAAGATGAGGCCC	1	+	161854244-161854293	1qH1-qH2.1	Mus musculus tenascin R (Tnr), mRNA.	The space external to the outermost structure of a cell. For cells without external protective or external encapsulating structures this refers to space outside of the plasma membrane. This term covers the host cell environment outside an intracellular parasite [goid 5576] [evidence IEA]; A layer consisting mainly of proteins (especially collagen) and glycosaminoglycans (mostly as proteoglycans) …	The attachment of a cell, either to another cell or to an underlying substrate such as the extracellular matrix, via cell adhesion molecules [goid 7155] [evidence IEA]; The cascade of processes by which a signal interacts with a receptor, causing a change in the level or activity of a second messenger or other downstream target, and ultimately effecting a change in the functioning of the cell [go…	Interacting selectively with any protein or protein complex (a complex of two or more proteins that may include other nonprotein molecules) [goid 5515] [evidence IEA]; Interacting selectively with one or more specific sites on a receptor molecule, a macromolecule that undergoes combination with a hormone, neurotransmitter, drug or intracellular messenger to initiate a change in cell function [goi…	TN-R; restrictin; janusin	TN-R; restrictin; janusin
5290025	0.913442	5.84723	4.97592	0.000666859	0.0030228	-1.96603	Mus musculus	RefSeq	ILMN_217231	ILMN_257998	CRTC1	NM_001004062.2	NM_001004062.2	NA	382056	118131085	NM_001004062.2	Crtc1	NP_001004062.1	ILMN_2680618	5290025	S	5399	CTCACCCCTTAGTTGGAAAAAGGACGCCATGGGCTGGGGTGCCCCTTTGA	8	-	72906482-72906531	8qB3.3	Mus musculus CREB regulated transcription coactivator 1 (Crtc1), mRNA.	All of the contents of a cell excluding the plasma membrane and nucleus, but including other subcellular structures [goid 5737] [evidence IEA]; A membrane-bounded organelle of eukaryotic cells in which chromosomes are housed and replicated. In most cells, the nucleus contains all of the cell's chromosomes except the organellar chromosomes, and is the site of RNA synthesis and processing. In some …	The synthesis of either RNA on a template of DNA or DNA on a template of RNA [goid 6350] [evidence IEA]; Any process that modulates the frequency, rate or extent of DNA-dependent transcription [goid 6355] [evidence IEA]		mKIAA0616; AI413414; TORC1; Mect1; R74955; MGC90786	mKIAA0616; AI413414; TORC1; Mect1; R74955; MGC90786
6040601	-0.903085	4.16573	-4.97194	0.000670627	0.00303881	-1.97206	Mus musculus	RefSeq	ILMN_223915	ILMN_260318	ELA2	NM_015779.2	NM_015779.2	NA	50701	114052443	NM_015779.2	Ela2	NP_056594.2	ILMN_1221700	6040601	S	542	GACAGTGGTGACTAACATGTGCCGCCGTCGTGTGAACGTATGCACTCTGG	10	+	79350466-79350515	10qC1	Mus musculus elastase 2, neutrophil (Ela2), mRNA.		The hydrolysis of a peptide bond or bonds within a protein [goid 6508] [evidence IEA]; The hydrolysis of a peptide bond or bonds within a protein during the chemical reactions and pathways resulting in the breakdown of a protein by individual cells [goid 51603] [evidence ISO]; The movement of leukocytes within or between different tissues and organs of the body [goid 50900] [evidence IMP]; The pr…	Catalysis of the hydrolysis of various bonds, e.g. C-O, C-N, C-C, phosphoric anhydride bonds, etc. Hydrolase is the systematic name for any enzyme of EC class 3 [goid 16787] [evidence IEA]; Catalysis of the hydrolysis of a peptide bond. A peptide bond is a covalent bond formed when the carbon atom from the carboxyl group of one amino acid shares electrons with the nitrogen atom from the amino gro…	NE; F430011M15Rik	NE; F430011M15Rik
6280243	0.288275	8.5918	4.97067	0.000671833	0.00304374	-1.97399	Mus musculus	RefSeq	ILMN_222994	ILMN_222994	IPPK	NM_199056.2	NM_199056.2	NA	75678	133892241	NM_199056.2	Ippk	NP_951011.1	ILMN_2757838	6280243	S	2481	CTCCTAGCTGGCACTGAGAATTCTACGGGGTCACCAGAAGTGTGCCTGGC	13	+	49558064-49558113	13qA5	Mus musculus inositol 1,3,4,5,6-pentakisphosphate 2-kinase (Ippk), mRNA.	All of the contents of a cell excluding the plasma membrane and nucleus, but including other subcellular structures [goid 5737] [evidence IEA]; A membrane-bounded organelle of eukaryotic cells in which chromosomes are housed and replicated. In most cells, the nucleus contains all of the cell's chromosomes except the organellar chromosomes, and is the site of RNA synthesis and processing. In some …		Catalysis of the transfer of a phosphate group, usually from ATP, to a substrate molecule [goid 16301] [evidence IEA]; Interacting selectively with a nucleotide, any compound consisting of a nucleoside that is esterified with (ortho)phosphate or an oligophosphate at any hydroxyl group on the ribose or deoxyribose moiety [goid 166] [evidence IEA]; Catalysis of the transfer of a group, e.g. a methy…	InsP6; 1810043M15Rik	InsP6; 1810043M15Rik
630524	0.3997	8.78704	4.96843	0.000673969	0.00305127	-1.97739	Mus musculus	RefSeq	ILMN_185910	ILMN_185910	UBAC1	NM_133835.1	NM_133835.1	NA	98766	19527049	NM_133835.1	Ubac1	NP_598596.1	ILMN_2431046	630524	S	1216	AATAGCCCTCTCTTTCAGGCCATCCTGGACAACCCAGTGGTGCAGCTGGG	2	-	25860871-25860920	2qA3	Mus musculus ubiquitin associated domain containing 1 (Ubac1), mRNA.	All of the contents of a cell excluding the plasma membrane and nucleus, but including other subcellular structures [goid 5737] [evidence IEA]	The chemical reactions and pathways resulting in the breakdown of a protein or peptide by hydrolysis of its peptide bonds, initiated by the covalent attachment of a ubiquitin moiety, or multiple ubiquitin moieties, to the protein [goid 6511] [evidence IEA]; The covalent alteration of one or more amino acids occurring in proteins, peptides and nascent polypeptides (co-translational, post-translati…		Ubadc1; GBDR1; AA407978; Gdbr1; 1110033G07Rik	Ubadc1; GBDR1; AA407978; Gdbr1; 1110033G07Rik
670161	-0.714537	11.611	-4.93463	0.000707059	0.00318648	-2.02871	Mus musculus	RefSeq	ILMN_209357	ILMN_251840	SEP15	NM_053102.2	NM_053102.2	NA	93684	110825968	NM_053102.2	Sep15	NP_444332.1	ILMN_1249836	670161	S	439	GCTCTGCAGCTCTTGCGATCTTCTTGGACAGTTTAATCTGCTCCCACTGG	3	+	144240615-144240664	3qH2	Mus musculus selenoprotein (Sep15), mRNA.	The irregular network of unit membranes, visible only by electron microscopy, that occurs in the cytoplasm of many eukaryotic cells. The membranes form a complex meshwork of tubular channels, which are often expanded into slitlike cavities called cisternae. The ER takes two forms, rough (or granular), with ribosomes adhering to the outer surface, and smooth (with no ribosomes attached) [goid 5783…	The process of assisting in the correct noncovalent folding of newly formed polypeptides or folding intermediates of polypeptides that have exited the ribosome and/or have been stabilized and transferred by other chaperone proteins. This process could involve several cycles of ATP hydrolysis [goid 51084] [evidence TAS]	Interacting selectively with selenium (Se) [goid 8430] [evidence IDA]; Interacting selectively with any protein or protein complex (a complex of two or more proteins that may include other nonprotein molecules) [goid 5515] [evidence IPI]	9430015P09Rik	9430015P09Rik
940424	1.30851	3.91631	4.92849	0.000713252	0.00321157	-2.03804	Mus musculus	RefSeq	ILMN_220861	ILMN_220861	KCNA2	NM_008417.3	NM_008417.3	NA	16490	142369063	NM_008417.3	Kcna2	NP_032443.2	ILMN_2727857	940424	S	3395	GTGGGCATGACTACACAGCTTACCAGGGTCCTGAAGACAGGCAGGTCTGT	3	+	106909736-106909785	3qF2.3	Mus musculus potassium voltage-gated channel, shaker-related subfamily, member 2 (Kcna2), mRNA.	Double layer of lipid molecules that encloses all cells, and, in eukaryotes, many organelles; may be a single or double lipid bilayer; also includes associated proteins [goid 16020] [evidence IEA]; Penetrating at least one phospholipid bilayer of a membrane. May also refer to the state of being buried in the bilayer with no exposure outside the bilayer. When used to describe a protein, indicates …	The directed movement of substances (such as macromolecules, small molecules, ions) into, out of, within or between cells, or within a multicellular organism [goid 6810] [evidence IEA]; The directed movement of potassium ions (K+) into, out of, within or between cells [goid 6813] [evidence IEA]; The directed movement of charged atoms or small charged molecules into, out of, within or between cell…	Interacting selectively with potassium (K+) ions [goid 30955] [evidence IEA]; Catalysis of facilitated diffusion of an ion (by an energy-independent process) by passage through a transmembrane aqueous pore or channel without evidence for a carrier-mediated mechanism [goid 5216] [evidence IEA]; Catalysis of facilitated diffusion of a potassium ion (by an energy-independent process) involving passa…	Kca1-2; Mk-2; Akr6a4; Kv1.2	Kca1-2; Kv1.2; Mk-2; Akr6a4
3850192	-0.571366	6.86583	-4.92348	0.000718356	0.00323156	-2.04567	Mus musculus	RefSeq	ILMN_219736	ILMN_219736	LRP6	NM_008514.1	NM_008514.1	NA	16974	6678717	NM_008514.1	Lrp6	NP_032540.1	ILMN_2712949	3850192	S	5353	GCCTTTGGGTTAACTAACATTTGAGGGCCGACAAGTCGAGAACCCATGAA	6	-	134400328-134400377	6qG1	Mus musculus low density lipoprotein receptor-related protein 6 (Lrp6), mRNA.	Penetrating at least one phospholipid bilayer of a membrane. May also refer to the state of being buried in the bilayer with no exposure outside the bilayer. When used to describe a protein, indicates that all or part of the peptide sequence is embedded in the membrane [goid 16021] [evidence IEA]; Double layer of lipid molecules that encloses all cells, and, in eukaryotes, many organelles; may be…	A type of vesicle-mediated transport in which cells take up external materials or membrane constituents by the invagination of small region of the plasma membrane to form a new membrane-bounded vesicle [goid 6897] [evidence IEA]; The biological process whose specific outcome is the progression of a multicellular organism over time from an initial condition (e.g. a zygote or a young adult) to a la…	Combining with an extracellular or intracellular messenger to initiate a change in cell activity [goid 4872] [evidence IEA]; Interacting selectively with any protein or protein complex (a complex of two or more proteins that may include other nonprotein molecules) [goid 5515] [evidence IPI]; Combining with a low-density lipoprotein to initiate a change in cell activity [goid 5041] [evidence ISO]	Cd	Cd
5270671	0.384225	6.49049	4.88289	0.000761135	0.00340391	-2.10757	Mus musculus	RefSeq	ILMN_185019	ILMN_252918	SNX30	NM_172468.2	NM_172468.2	NA	209131	84781798	NM_172468.2	Snx30	NP_766056.1	ILMN_2705578	5270671	S	2345	GAGTGAGCACGCCAGCGTCCTTGTCCTTATGGGATGCCTCAGGATCTTGT	4	+	59912450-59912499	4qB3	Mus musculus sorting nexin family member 30 (Snx30), mRNA.		The directed movement of proteins into, out of, within or between cells [goid 15031] [evidence IEA]; The directed movement of substances (such as macromolecules, small molecules, ions) into, out of, within or between cells, or within a multicellular organism [goid 6810] [evidence IEA]; Any process that mediates interactions between a cell and its surroundings. Encompasses interactions such as sig…	Interacting selectively with any inositol-containing glycerophospholipid [goid 35091] [evidence IEA]; Interacting selectively with any protein or protein complex (a complex of two or more proteins that may include other nonprotein molecules) [goid 5515] [evidence IEA]	4732481H14Rik; MGC106086; C030041J06Rik	4732481H14Rik; MGC106086; C030041J06Rik
5890326	0.910511	7.23259	4.85599	0.000790979	0.00352328	-2.14871	Mus musculus	RefSeq	ILMN_221728	ILMN_231663	ZFP91-CNTF	NM_001039718.1	NM_001039718.1	NA	664779	90669975	NM_001039718.1	Zfp91-cntf	NP_001034807.1	ILMN_2757889	5890326	S	2118	GAAGGACAGTGTAGTGGCACACAAAGCAAAAAGCCACCCTGAGGTGCTGA	19	-	12844869-12844918		Mus musculus zinc finger protein 91, ciliary neurotrophic factor transcription unit (Zfp91-cntf), mRNA.				Pzf; 9130014I08Rik; AW545902; A530054C17Rik; AL024263	Pzf; 9130014I08Rik; AW545902; A530054C17Rik; AL024263
3890397	1.01783	5.28693	4.8475	0.000800655	0.00356021	-2.16172	Mus musculus	RefSeq	ILMN_221221	ILMN_221221	TMEM107	NM_028336.2	NM_028336.2	NA	66910	141802127	NM_028336.2	Tmem107	NP_082612.1	ILMN_1234294	3890397	S	1166	CACATAGCGCTTCTAATTTGCCGCGTGTGAGGGGAGCATTCTGGGATGGT	11	+	68886696-68886745	11qB3	Mus musculus transmembrane protein 107 (Tmem107), transcript variant 2, mRNA.	Penetrating at least one phospholipid bilayer of a membrane. May also refer to the state of being buried in the bilayer with no exposure outside the bilayer. When used to describe a protein, indicates that all or part of the peptide sequence is embedded in the membrane [goid 16021] [evidence IEA]; Double layer of lipid molecules that encloses all cells, and, in eukaryotes, many organelles; may be…			RP23-19I2.5; 2810049P21Rik; 1110004B13Rik	RP23-19I2.5; 2810049P21Rik; 1110004B13Rik
2490370	-0.95036	6.96864	-4.82695	0.000824613	0.00365724	-2.19324	Mus musculus	RefSeq	ILMN_192974	ILMN_246247	ASB3	NM_023906.3	NM_023906.3	NA	65257	114205425	NM_023906.3	Asb3	NP_076395.2	ILMN_2663555	2490370	S	191	TTTTACAGAGGCTTACTCAGACACGTGTTCTACGGTTGGACTTGCTGCCA	11	+	30898331-30898380	11qA4	Mus musculus ankyrin repeat and SOCS box-containing 3 (Asb3), mRNA.	The part of a cell or its extracellular environment in which a gene product is located. A gene product may be located in one or more parts of a cell and its location may be as specific as a particular macromolecular complex, that is, a stable, persistent association of macromolecules that function together [goid 5575] [evidence ND ]	The chemical reactions and pathways resulting in the breakdown of a protein or peptide by hydrolysis of its peptide bonds, initiated by the covalent attachment of a ubiquitin moiety, or multiple ubiquitin moieties, to the protein [goid 6511] [evidence IEA]; A series of reactions within the cell that occur as a result of a single trigger reaction or compound [goid 7242] [evidence IEA]		2400011J03Rik	2400011J03Rik
2810128	-0.74336	11.5766	-4.81758	0.000835791	0.00370235	-2.20764	Mus musculus	RefSeq	ILMN_201514	ILMN_201514	PSMB7	NM_011187.1	NM_011187.1	NA	19177	6755205	NM_011187.1	Psmb7	NP_035317.1	ILMN_1221340	2810128	S	98	AAGGGGTTCAAGCTCCCGAAAGCTCGGAAAACTGGCACTACCATCGCGGG	2	-	38498890-38498939	2qB	Mus musculus proteasome (prosome, macropain) subunit, beta type 7 (Psmb7), mRNA.	All of the contents of a cell excluding the plasma membrane and nucleus, but including other subcellular structures [goid 5737] [evidence IEA]; A membrane-bounded organelle of eukaryotic cells in which chromosomes are housed and replicated. In most cells, the nucleus contains all of the cell's chromosomes except the organellar chromosomes, and is the site of RNA synthesis and processing. In some …	The chemical reactions and pathways resulting in the breakdown of a protein or peptide by hydrolysis of its peptide bonds, initiated by the covalent attachment of a ubiquitin moiety, or multiple ubiquitin moieties, to the protein [goid 6511] [evidence IEA]	Catalysis of the hydrolysis of various bonds, e.g. C-O, C-N, C-C, phosphoric anhydride bonds, etc. Hydrolase is the systematic name for any enzyme of EC class 3 [goid 16787] [evidence IEA]; Catalysis of the hydrolysis of internal peptide bonds in a polypeptide chain by a mechanism in which the hydroxyl group of a threonine residue at the active center acts as a nucleophile [goid 4298] [evidence I…	MC14; AU020723	MC14; AU020723
5340463	0.405109	7.87171	4.79336	0.000865431	0.00382113	-2.24488	Mus musculus	RefSeq	ILMN_211578	ILMN_211578	NUDT8	NM_025529.3	NM_025529.3	NA	66387	142381955	NM_025529.3	Nudt8	NP_079805.1	ILMN_2617305	5340463	S	588	TTGCATGGACCACACCGTGTCTGGGGCCTCACAGCTGTCATCACTGAGCT	19	+	4001904-4001953	19qA	Mus musculus nudix (nucleoside diphosphate linked moiety X)-type motif 8 (Nudt8), mRNA.	A semiautonomous, self replicating organelle that occurs in varying numbers, shapes, and sizes in the cytoplasm of virtually all eukaryotic cells. It is notably the site of tissue respiration [goid 5739] [evidence IDA]		Catalysis of the hydrolysis of various bonds, e.g. C-O, C-N, C-C, phosphoric anhydride bonds, etc. Hydrolase is the systematic name for any enzyme of EC class 3 [goid 16787] [evidence IEA]; Interacting selectively with magnesium (Mg) ions [goid 287] [evidence IEA]; Interacting selectively with manganese (Mn) ions [goid 30145] [evidence IEA]; Interacting selectively with any metal ion [goid 46872]…	2310039H17Rik	2310039H17Rik
5690092	-0.449649	9.43406	-4.77601	0.000887369	0.00390591	-2.27163	Mus musculus	RefSeq	ILMN_189166	ILMN_251058	AK1	NM_021515.2	NM_021515.2	NA	11636	118130459	NM_021515.2	Ak1	NP_067490.1	ILMN_2667805	5690092	S	1667	GAGCATGCAGATTAAGGAGTGTGAGCTGCCATAGACAAGGATGTGGGATC	2	+	32490205-32490254	2qB	Mus musculus adenylate kinase 1 (Ak1), mRNA.	All of the contents of a cell excluding the plasma membrane and nucleus, but including other subcellular structures [goid 5737] [evidence IDA]; The membrane surrounding a cell that separates the cell from its external environment. It consists of a phospholipid bilayer and associated proteins [goid 5886] [evidence IDA]; A semiautonomous, self replicating organelle that occurs in varying numbers, s…	The process by which the cell cycle is halted during one of the normal phases (G1, S, G2, M) [goid 7050] [evidence IDA]; The chemical reactions and pathways involving nucleobases, nucleosides, nucleotides and nucleic acids [goid 6139] [evidence IEA]; The chemical reactions and pathways involving ATP, adenosine triphosphate, a universally important coenzyme and enzyme regulator [goid 46034] [evide…	Catalysis of the transfer of a group, e.g. a methyl group, glycosyl group, acyl group, phosphorus-containing, or other groups, from one compound (generally regarded as the donor) to another compound (generally regarded as the acceptor). Transferase is the systematic name for any enzyme of EC class 2 [goid 16740] [evidence IEA]; Catalysis of the transfer of a phosphate group, usually from ATP, to …	B430205N08Rik; Ak-1	B430205N08Rik; Ak-1
380279	-1.46776	6.10283	-4.762	0.000905505	0.00397961	-2.29325	Mus musculus	RefSeq	ILMN_214690	ILMN_214690	GDI2	NM_008112.4	NM_008112.4	NA	14569	116089272	NM_008112.4	Gdi2	NP_032138.3	ILMN_2650812	380279	S	311	GGTTCTTCATATGGATCAGAACCCATACTATGGAGGAGAAAGTGCGTCTA	13	+	3548150-3548199	13qA1	Mus musculus guanosine diphosphate (GDP) dissociation inhibitor 2 (Gdi2), mRNA.	All of the contents of a cell excluding the plasma membrane and nucleus, but including other subcellular structures [goid 5737] [evidence IEA]; Double layer of lipid molecules that encloses all cells, and, in eukaryotes, many organelles; may be a single or double lipid bilayer; also includes associated proteins [goid 16020] [evidence IEA]; A compound membranous cytoplasmic organelle of eukaryotic…	The directed movement of proteins into, out of, within or between cells [goid 15031] [evidence IEA]; Any series of molecular signals in which a small monomeric GTPase relays one or more of the signals [goid 7264] [evidence IPI]; Any process that modulates the rate of GTP hydrolysis by a GTPase [goid 43087] [evidence IEA]	Increases the activity of a GTPase, an enzyme that catalyzes the hydrolysis of GTP [goid 5096] [evidence IEA]; Increases the rate of GTP hydrolysis by a GTPase of the Rab family [goid 5097] [evidence IPI]; Prevents the dissociation of GDP from the small GTPase Rab, thereby preventing GTP from binding [goid 5093] [evidence IEA]	GDI-B; GDIB; Gdi3	GDI-B; GDIB; Gdi3
7100519	-1.27072	7.90477	-4.68697	0.00100964	0.00438404	-2.40948	Mus musculus	RefSeq	ILMN_221587	ILMN_221587	CLK4	NM_007714.4	NM_007714.4	NA	12750	145966867	NM_007714.4	Clk4	NP_031740.1	ILMN_2737517	7100519	S	517	GGATGATGAGGAGGGTCACCTGATCTGTCAAAGTGGAGACGTTCTAAGAG				11qB1.3	Mus musculus CDC like kinase 4 (Clk4), mRNA.	A membrane-bounded organelle of eukaryotic cells in which chromosomes are housed and replicated. In most cells, the nucleus contains all of the cell's chromosomes except the organellar chromosomes, and is the site of RNA synthesis and processing. In some species, or in specialized cell types, RNA metabolism or DNA replication may be absent [goid 5634] [evidence IDA]	The process of introducing a phosphate group on to a protein [goid 6468] [evidence IEA]; The posttranslational phosphorylation of peptidyl-tyrosine to form peptidyl-O4'-phospho-L-tyrosine [goid 18108] [evidence IDA]; The phosphorylation by a protein of one or more of its own amino acid residues, or residues on an identical protein [goid 46777] [evidence IDA]	Catalysis of the transfer of a phosphate group, usually from ATP, to a substrate molecule [goid 16301] [evidence IEA]; Interacting selectively with a nucleotide, any compound consisting of a nucleoside that is esterified with (ortho)phosphate or an oligophosphate at any hydroxyl group on the ribose or deoxyribose moiety [goid 166] [evidence IEA]; Catalysis of the reaction: ATP + a protein serine/…	AI987988; C85119	AI987988; C85119
4250156	-0.243988	11.0076	-4.68154	0.00101766	0.00441664	-2.41792	Mus musculus	RefSeq	ILMN_211268	ILMN_211268	ACBD3	NM_133225.2	NM_133225.2	NA	170760	142364602	NM_133225.2	Acbd3	NP_573488.1	ILMN_1235783	4250156	S	3260	CCTTGTTCTTGGGAGCAGTGAATGTCACTTTACATGGCTGTTTCTGTCAC	1	+	182684124-182684173	1qH4	Mus musculus acyl-Coenzyme A binding domain containing 3 (Acbd3), mRNA.	A compound membranous cytoplasmic organelle of eukaryotic cells, consisting of flattened, ribosome-free vesicles arranged in a more or less regular stack. The Golgi apparatus differs from the endoplasmic reticulum in often having slightly thicker membranes, appearing in sections as a characteristic shallow semicircle so that the convex side (cis or entry face) abuts the endoplasmic reticulum, sec…	The chemical reactions and pathways resulting in the formation of steroids, compounds with a 1,2,cyclopentanoperhydrophenanthrene nucleus; includes de novo formation and steroid interconversion by modification [goid 6694] [evidence IEA]; The chemical reactions and pathways resulting in the formation of lipids, compounds soluble in an organic solvent but not, or sparingly, in an aqueous solvent [g…	The selective, often stoichiometric, interaction of a molecule with one or more specific sites on another molecule [goid 5488] [evidence IEA]; Interacting selectively with acyl-CoA, any derivative of coenzyme A in which the sulfhydryl group is in thiolester linkage with a fatty acyl group [goid 62] [evidence IEA]	GOLPH1; Gocap1; D1Ertd10e; 8430407O11Rik; 60kDa; Pap7; GCP60	GOLPH1; Gocap1; D1Ertd10e; 8430407O11Rik; 60kDa; Pap7; GCP60
450397	-0.405642	8.45027	-4.67724	0.00102406	0.00444067	-2.42461	Mus musculus	RefSeq	ILMN_211732	ILMN_211732	9130005N14RIK	NM_026667.2	NM_026667.2	NA	68303	31560127	NM_026667.2	9130005N14Rik	NP_080943.2	ILMN_1217235	450397	S	2802	TTGTGTGACTGTGTTTTGTTTTTTCAGCTGTATGTCTCCTGAAACAACCA	5	+	65433030-65433079	5qC3.1	Mus musculus RIKEN cDNA 9130005N14 gene (9130005N14Rik), mRNA.				1190001N04Rik; Noxp20; MGC117924	1190001N04Rik; Noxp20; MGC117924
870072	0.872791	7.41663	4.67382	0.00102918	0.00445982	-2.42992	Mus musculus	RefSeq	ILMN_218952	ILMN_218952	SNAI3	NM_013914.2	NM_013914.2	NA	30927	31560481	NM_013914.2	Snai3	NP_038942.1	ILMN_1239726	870072	S	1482	TGTCCTCAGCACTGTTGTCCTGCTTGGGGCTGGCCTCGGTGGCTGGTTAA	8	-	124978163-124978212	8qE1	Mus musculus snail homolog 3 (Drosophila) (Snai3), mRNA.	A membrane-bounded organelle of eukaryotic cells in which chromosomes are housed and replicated. In most cells, the nucleus contains all of the cell's chromosomes except the organellar chromosomes, and is the site of RNA synthesis and processing. In some species, or in specialized cell types, RNA metabolism or DNA replication may be absent [goid 5634] [evidence IEA]; The living contents of a cell…	The synthesis of either RNA on a template of DNA or DNA on a template of RNA [goid 6350] [evidence IEA]; Any process that modulates the frequency, rate or extent of DNA-dependent transcription [goid 6355] [evidence IDA]	Interacting selectively with any nucleic acid [goid 3676] [evidence IEA]; The function of binding to a specific DNA sequence in order to modulate transcription. The transcription factor may or may not also interact selectively with a protein or macromolecular complex [goid 3700] [evidence IDA]; Interacting selectively with zinc (Zn) ions [goid 8270] [evidence IEA]; Interacting selectively with DN…	Smuc; Zfp293; AI643946	Smuc; Zfp293; AI643946
4640717	-0.870539	8.05876	-4.67243	0.00103126	0.00446812	-2.43209	Mus musculus	RefSeq	ILMN_223899	ILMN_260938	LOC669660	XM_976375.1	XM_976375.1	NA	669660	94371335	XM_976375.1	LOC669660	XP_981469.1	ILMN_2771219	4640717	S	72	GGACGTGGTTCTCAGCATCGATGGGATCAGTGCACAGGGAATGACGCATC					PREDICTED: Mus musculus similar to PDZ and LIM domain protein 5 (Enigma homolog) (Enigma-like PDZ and LIM domains protein) (LOC669660), mRNA.
6840059	1.18327	4.30924	4.66174	0.00104749	0.00452695	-2.44874	Mus musculus	RefSeq	ILMN_184661	ILMN_260185	TNFSF13B	NM_033622.1	NM_033622.1	NA	24099	15826857	NM_033622.1	Tnfsf13b	NP_296371.1	ILMN_2507286	6840059	S	1383	CCAGTCCTTTGCCAACACGCACCGCAACCTTGCTTTTTGCCTTGGGTGAC	8	+	10035684-10035733	8qA1.1	Mus musculus tumor necrosis factor (ligand) superfamily, member 13b (Tnfsf13b), mRNA.	That part of a multicellular organism outside the cells proper, usually taken to be outside the plasma membranes, and occupied by fluid [goid 5615] [evidence IEA]; Penetrating at least one phospholipid bilayer of a membrane. May also refer to the state of being buried in the bilayer with no exposure outside the bilayer. When used to describe a protein, indicates that all or part of the peptide se…	Any process that activates or increases the frequency, rate, or extent of germinal center formation [goid 2636] [evidence IMP]; The process of providing, via surface-bound receptor-ligand pairs, a second, antigen-independent, signal in addition to that provided by the T cell receptor to augment T cell activation [goid 31295] [evidence IDA]; Any process that activates or increases the rate or exte…	Functions to control the survival, growth, differentiation and effector function of tissues and cells [goid 5125] [evidence IEA]; Interacting selectively with the tumor necrosis factor receptor [goid 5164] [evidence IEA]	TALL-1; MGC124060; BLyS; THANK; zTNF4; TNFSF20; D8Ertd387e; TALL1; BAFF; MGC124061	BLyS; zTNF4; TNFSF20; TALL1; BAFF; MGC124061; TALL-1; MGC124060; THANK; D8Ertd387e
6560630	1.80284	5.32815	4.65713	0.00105456	0.00455217	-2.45592	Mus musculus	RefSeq	ILMN_209395	ILMN_209395	KCNN2	NM_080465.2	NM_080465.2	NA	140492	118131090	NM_080465.2	Kcnn2	NP_536713.1	ILMN_2595430	6560630	S	1581	CAGACAGCAGCAAAGGGACTTCATTGAGACACAGATGGAGAACTACGACA	18	+	45845072-45845121	18qC	Mus musculus potassium intermediate/small conductance calcium-activated channel, subfamily N, member 2 (Kcnn2), mRNA.	Penetrating at least one phospholipid bilayer of a membrane. May also refer to the state of being buried in the bilayer with no exposure outside the bilayer. When used to describe a protein, indicates that all or part of the peptide sequence is embedded in the membrane [goid 16021] [evidence IEA]; Double layer of lipid molecules that encloses all cells, and, in eukaryotes, many organelles; may be…	The directed movement of substances (such as macromolecules, small molecules, ions) into, out of, within or between cells, or within a multicellular organism [goid 6810] [evidence IEA]; The directed movement of charged atoms or small charged molecules into, out of, within or between cells [goid 6811] [evidence IEA]; The directed movement of potassium ions (K+) into, out of, within or between cell…	Interacting selectively with calmodulin, a calcium-binding protein with many roles, both in the calcium-bound and calcium-free states [goid 5516] [evidence IEA]; Catalysis of facilitated diffusion of an ion (by an energy-independent process) by passage through a transmembrane aqueous pore or channel without evidence for a carrier-mediated mechanism [goid 5216] [evidence IEA]; Catalysis of the cal…	SK2; SKCA2	SK2; SKCA2
4860735	-0.450672	8.11233	-4.64694	0.00107037	0.00461732	-2.47179	Mus musculus	RefSeq	ILMN_219362	ILMN_219362	D10WSU102E	NM_026579.2	NM_026579.2	NA	28109	46195802	NM_026579.2	D10Wsu102e	NP_080855.1	ILMN_2707694	4860735	S	3361	GCGTCATATTGAAGGAAGTTGTAGGAGTTGAAGGGGGTGTCGGGGTGCCA	10	+	82831464-82831513	10qC1	Mus musculus DNA segment, Chr 10, Wayne State University 102, expressed (D10Wsu102e), mRNA.				C430041I18Rik; AI747614	C430041I18Rik; AI747614
130386	1.70436	5.13948	4.61607	0.00111988	0.00481152	-2.52001	Mus musculus	RefSeq	ILMN_212428	ILMN_212428	ELF2	NM_023502.1	NM_023502.1	NA	69257	12963704	NM_023502.1	Elf2	NP_075991.1	ILMN_2748336	130386	S	456	CAGTAATGCTCACTGTACGGATAAGACCATTGAAGCTGCTGAAGCCCTGC	3	-	51070719-51070768	3qC	Mus musculus E74-like factor 2 (Elf2), mRNA.	A membrane-bounded organelle of eukaryotic cells in which chromosomes are housed and replicated. In most cells, the nucleus contains all of the cell's chromosomes except the organellar chromosomes, and is the site of RNA synthesis and processing. In some species, or in specialized cell types, RNA metabolism or DNA replication may be absent [goid 5634] [evidence IEA]	Any process that modulates the frequency, rate or extent of DNA-dependent transcription [goid 6355] [evidence IEA]; The synthesis of either RNA on a template of DNA or DNA on a template of RNA [goid 6350] [evidence IEA]	Interacting selectively with DNA (deoxyribonucleic acid) [goid 3677] [evidence IEA]; The function of binding to a specific DNA sequence in order to modulate transcription. The transcription factor may or may not also interact selectively with a protein or macromolecular complex [goid 3700] [evidence IEA]; Interacting selectively with DNA of a specific nucleotide composition, e.g. GC-rich DNA bind…	2610036A20Rik; NERF; NERF-1A; NERF-2; EU32; NERF-1B; BB183398; AW111824; MGC102660; A230104O07Rik	2610036A20Rik; NERF; NERF-1A; NERF-2; EU32; NERF-1B; BB183398; AW111824; MGC102660; A230104O07Rik
50047	-0.509016	7.90847	-4.59842	0.00114927	0.00492683	-2.54762	Mus musculus	RefSeq	ILMN_216977	ILMN_216977	MTERFD2	NM_178051.3	NM_178051.3	NA	69821	46852399	NM_178051.3	Mterfd2	NP_835152.1	ILMN_2679695	50047	S	313	CCGTTCCCTCCAGGACATGGGTTTTGCTGAAGCCCACATTCACAGCTTGT	1	-	95201367-95201416	1qD	Mus musculus MTERF domain containing 2 (Mterfd2), mRNA.				1810059A23Rik; 4933412H03Rik	1810059A23Rik; 4933412H03Rik
3850129	0.538022	9.67162	4.58782	0.00116732	0.00499778	-2.56423	Mus musculus	RefSeq	ILMN_212441	ILMN_212441	GSTM1	NM_010358.4	NM_010358.4	NA	14862	141803498	NM_010358.4	Gstm1	NP_034488.1	ILMN_1228233	3850129	S	1135	CACGCTTCCTAGAATTACCCCGATGGTCAACACTATCTTAGTGCTAGCCC	3	-	107815277-107815326	3qF2.3	Mus musculus glutathione S-transferase, mu 1 (Gstm1), mRNA.	All of the contents of a cell excluding the plasma membrane and nucleus, but including other subcellular structures [goid 5737] [evidence IEA]	The chemical reactions and pathways, including anabolism and catabolism, by which living organisms transform chemical substances. Metabolic processes typically transform small molecules, but also include macromolecular processes such as DNA repair and replication, and protein synthesis and degradation [goid 8152] [evidence IEA]	Catalysis of the transfer of a group, e.g. a methyl group, glycosyl group, acyl group, phosphorus-containing, or other groups, from one compound (generally regarded as the donor) to another compound (generally regarded as the acceptor). Transferase is the systematic name for any enzyme of EC class 2 [goid 16740] [evidence IEA]; Catalysis of the reaction: R-X + glutathione = H-X + R-S-glutathione.…	Gstb1; Gstb-1	Gstb1; Gstb-1
4150019	-0.184486	9.77527	-4.58722	0.00116835	0.00500133	-2.56516	Mus musculus	RefSeq	ILMN_215940	ILMN_230854	ZFP644	NM_026856.2	NM_026856.2	NA	52397	51988895	NM_026856.2	Zfp644	NP_081132.2	ILMN_2740222	4150019	S	5334	GAAATAAATGTGCTGTGAGGAATGGACAGTACGGTGCAGGTGTCTTGGTC	5	-	107046066-107046115	5qE5	Mus musculus zinc finger protein 644 (Zfp644), mRNA.				BM-005; AA408882; D5Ertd689e; Zep-2; 1110068L01Rik	BM-005; AA408882; D5Ertd689e; Zep-2; 1110068L01Rik
4920553	-0.775336	7.3862	-4.57984	0.00118111	0.00505091	-2.57674	Mus musculus	RefSeq	ILMN_213787	ILMN_213787	SGK3	NM_177547.3	NM_177547.3	NA	170755	83649752	NM_177547.3	Sgk3	NP_808215.2	ILMN_2665359	4920553	S	1237	TCAGAAAACAGCCCTATGACAACACTGTGGACTGGTGGTGCCTGGGCGCT	1	+	9876147-9876196	1qA2	Mus musculus serum/glucocorticoid regulated kinase 3 (Sgk3), transcript variant 2, mRNA.	A vesicle formed of membrane or protein, found in the cytoplasm of a cell [goid 31410] [evidence IEA]; A membrane-bounded organelle that carries materials newly ingested by endocytosis. It passes many of the materials to lysosomes for degradation [goid 5768] [evidence IEA]; A membrane-bounded vesicle found in the cytoplasm of the cell [goid 16023] [evidence IDA]	A process which directly inhibits any of the steps required for cell death by apoptosis [goid 6916] [evidence IDA]; The process of introducing a phosphate group on to a protein [goid 6468] [evidence IEA]; Any process that mediates interactions between a cell and its surroundings. Encompasses interactions such as signaling or attachment between one cell and another cell, between a cell and an extr…	Interacting selectively with ATP, adenosine 5'-triphosphate, a universally important coenzyme and enzyme regulator [goid 5524] [evidence IEA]; Catalysis of the reaction: ATP + a protein serine/threonine = ADP + protein serine/threonine phosphate [goid 4674] [evidence IDA]; Interacting selectively with any inositol-containing glycerophospholipid [goid 35091] [evidence IEA]; Interacting selectively…	A330005P07Rik; 2510015P22Rik; Cisk	A330005P07Rik; 2510015P22Rik; Cisk
4890041	0.290383	9.37597	4.57136	0.00119594	0.00510923	-2.59004	Mus musculus	RefSeq	ILMN_217015	ILMN_217015	ILVBL	NM_173751.3	NM_173751.3	NA	216136	42476077	NM_173751.3	Ilvbl	NP_776112.1	ILMN_1256292	4890041	S	2176	GAGGCACCTTGGCAACCCTGGGTAGCTCTTTCCAAAAGGTTCAGCTGTAC	10	+	78042248-78042297	10qC1	Mus musculus ilvB (bacterial acetolactate synthase)-like (Ilvbl), mRNA.	Double layer of lipid molecules that encloses all cells, and, in eukaryotes, many organelles; may be a single or double lipid bilayer; also includes associated proteins [goid 16020] [evidence IEA]; Penetrating at least one phospholipid bilayer of a membrane. May also refer to the state of being buried in the bilayer with no exposure outside the bilayer. When used to describe a protein, indicates …		Interacting selectively with magnesium (Mg) ions [goid 287] [evidence IEA]; Catalysis of the transfer of a group, e.g. a methyl group, glycosyl group, acyl group, phosphorus-containing, or other groups, from one compound (generally regarded as the donor) to another compound (generally regarded as the acceptor). Transferase is the systematic name for any enzyme of EC class 2 [goid 16740] [evidence…	5830463I21; AI415009	5830463I21; AI415009
2690446	-0.518954	8.06296	-4.56323	0.00121037	0.00516743	-2.60281	Mus musculus	RefSeq	ILMN_214243	ILMN_214243	2810022L02RIK	NM_144882.3	NM_144882.3	NA	67198	141801973	NM_144882.3	2810022L02Rik	NP_659131.1	ILMN_2645865	2690446	S	3739	GACCTGATCACATTGTTTCCTAGACTTTAGCCTTAGACTCTGGCATGTGA	1	+	58005115-58005164	1qC1.3	Mus musculus RIKEN cDNA 2810022L02 gene (2810022L02Rik), mRNA.				AA987173; AI842453; AI480531; AW413586; A230104H11Rik	AA987173; AI842453; AI480531; AW413586; A230104H11Rik
510092	-0.760661	9.80741	-4.5323	0.00126691	0.00537756	-2.65144	Mus musculus	RefSeq	ILMN_221666	ILMN_221666	TXNDC12	NM_025334.3	NM_025334.3	NA	66073	118130370	NM_025334.3	Txndc12	NP_079610.1	ILMN_1255473	510092	S	1143	GAAACTCTCAAGTCTGCAAACCCTACATGAAGCCATTTTGTCAATTCACC	4	+	108534593-108534642	4qC7	Mus musculus thioredoxin domain containing 12 (endoplasmic reticulum) (Txndc12), mRNA.	The irregular network of unit membranes, visible only by electron microscopy, that occurs in the cytoplasm of many eukaryotic cells. The membranes form a complex meshwork of tubular channels, which are often expanded into slitlike cavities called cisternae. The ER takes two forms, rough (or granular), with ribosomes adhering to the outer surface, and smooth (with no ribosomes attached) [goid 5783…	The process of removal or addition of one or more electrons with or without the concomitant removal or addition of a proton or protons [goid 55114] [evidence IEA]; Any process that maintains the redox environment of a cell or compartment within a cell [goid 45454] [evidence IEA]	Catalysis of an oxidation-reduction (redox) reaction, a reversible chemical reaction in which the oxidation state of an atom or atoms within a molecule is altered. One substrate acts as a hydrogen or electron donor and becomes oxidized, while the other acts as hydrogen or electron acceptor and becomes reduced [goid 16491] [evidence IEA]; Catalysis of the reaction: 2 glutathione + protein-disulfid…	0610040B21Rik; ERp19	0610040B21Rik; ERp19
2030091	-0.441393	7.55869	-4.5042	0.00132074	0.00558393	-2.69574	Mus musculus	RefSeq	ILMN_216388	ILMN_246554	RBM9	NM_175387.2	NM_175387.2	NA	93686	118129875	NM_175387.2	Rbm9	NP_780596.1	ILMN_2670527	2030091	S	1388	CAGCCCCCAGTTCATGAGGCCTGGCTATTGCAATATTTACTAGTAGAGGA	15	-	76914514-76914563	15qD3-qE1	Mus musculus RNA binding motif protein 9 (Rbm9), transcript variant 2, mRNA.	All of the contents of a cell excluding the plasma membrane and nucleus, but including other subcellular structures [goid 5737] [evidence IEA]; A membrane-bounded organelle of eukaryotic cells in which chromosomes are housed and replicated. In most cells, the nucleus contains all of the cell's chromosomes except the organellar chromosomes, and is the site of RNA synthesis and processing. In some …	Any process specifically pertinent to the functioning of integrated living units: cells, tissues, organs, and organisms. A process is a collection of molecular events with a defined beginning and end [goid 8150] [evidence ND ]; Any process involved in the conversion of a primary mRNA transcript into one or more mature mRNA(s) prior to translation into polypeptide [goid 6397] [evidence IEA]; The p…	Interacting selectively with any protein or protein complex (a complex of two or more proteins that may include other nonprotein molecules) [goid 5515] [evidence IPI]; Interacting selectively with an RNA molecule or a portion thereof [goid 3723] [evidence ISS]; Interacting selectively with any nucleic acid [goid 3676] [evidence IEA]; Interacting selectively with a nucleotide, any compound consist…	Fbm2; AI118529; AA407676; 2810460A15Rik; Hrnbp2; Fxh	Fbm2; AI118529; AA407676; 2810460A15Rik; Hrnbp2; Fxh
1980619	0.43967	11.2372	4.49801	0.00133291	0.00563075	-2.7055	Mus musculus	RefSeq	ILMN_196288	ILMN_256871	PPM1B	NM_011151.1	NM_011151.1	NA	19043	33859599	NM_011151.1	Ppm1b	NP_035281.1	ILMN_2591381	1980619	S	3164	GTCCGGGATGGTCTTCTGATGTCTCCTACAATGCGGTGAGCAGAACCGAC	17	+	85416384-85416433	17qE4	Mus musculus protein phosphatase 1B, magnesium dependent, beta isoform (Ppm1b), mRNA. XM_925494 XM_925495 XM_925496	A complex, normally consisting of a catalytic and a regulatory subunit, which catalyzes the removal of a phosphate group from a serine or threonine residue of a protein [goid 8287] [evidence IEA]	The process of removing one or more phosphoric residues from a protein [goid 6470] [evidence IEA]	Catalysis of the hydrolysis of various bonds, e.g. C-O, C-N, C-C, phosphoric anhydride bonds, etc. Hydrolase is the systematic name for any enzyme of EC class 3 [goid 16787] [evidence IEA]; Interacting selectively with magnesium (Mg) ions [goid 287] [evidence IEA]; Interacting selectively with manganese (Mn) ions [goid 30145] [evidence IEA]; Catalysis of the reaction: a phosphoprotein + H2O = a p…	PP2CB; MGC106489	MGC106489; PP2CB
7650196	-0.487529	7.17817	-4.49346	0.00134195	0.00566148	-2.71269	Mus musculus	RefSeq	ILMN_222720	ILMN_222720	SYN1	NM_013680.3	NM_013680.3	NA	20964	62177179	NM_013680.3	Syn1	NP_038708.2	ILMN_2762083	7650196	S	3036	CACCCCTCAGCGGCTCTGAACCCCCAAGAGAAGAGTCGGGAAGCAAAATA	X	-	20437658-20437707	XqA1.3	Mus musculus synapsin I (Syn1), mRNA.	A compound membranous cytoplasmic organelle of eukaryotic cells, consisting of flattened, ribosome-free vesicles arranged in a more or less regular stack. The Golgi apparatus differs from the endoplasmic reticulum in often having slightly thicker membranes, appearing in sections as a characteristic shallow semicircle so that the convex side (cis or entry face) abuts the endoplasmic reticulum, sec…	The regulated release of neurotransmitter into the synaptic cleft. A neurotransmitter is any of a group of substances that are released on excitation from the axon terminal of a presynaptic neuron of the central or peripheral nervous system and travel across the synaptic cleft to either excite or inhibit the target cell. Among the many substances that have the properties of a neurotransmitter are…	Interacting selectively with monomeric or multimeric forms of actin, including actin filaments [goid 3779] [evidence IEA]; The formation of a protein dimer, a macromolecular structure consists of two noncovalently associated identical or nonidentical subunits [goid 46983] [evidence TAS]; Catalysis of a biochemical reaction at physiological temperatures. In biologically catalyzed reactions, the re…	Synapsin Ia; Syn-1; Synapsin Ib	Synapsin Ia; Syn-1; Synapsin Ib
4830386	-0.774831	7.41257	-4.45661	0.00141753	0.00594811	-2.77098	Mus musculus	RefSeq	ILMN_186017	ILMN_238102	DIAP3	NM_019670.1	NM_019670.1	NA	56419	9789930	NM_019670.1	Diap3	NP_062644.1	ILMN_2606436	4830386	S	3364	CATGCGTCTACAGGGAGGATCAAGGCAGTTGAGAAGGAAGCCTGTAATGC	14	-	87056232-87056281	14qE1	Mus musculus diaphanous homolog 3 (Drosophila) (Diap3), mRNA.		A process that is carried out at the cellular level which results in the formation, arrangement of constituent parts, or disassembly of cytoskeletal structures comprising actin filaments and their associated proteins [goid 30036] [evidence IEA]; A process that is carried out at the cellular level which results in the formation, arrangement of constituent parts, or disassembly of a cellular compon…	Interacting selectively with monomeric or multimeric forms of actin, including actin filaments [goid 3779] [evidence IEA]; Interacting selectively with Rho protein, any member of the Rho subfamily of the Ras superfamily of monomeric GTPases. Proteins in the Rho subfamily are involved in relaying signals from cell-surface receptors to the actin cytoskeleton [goid 17048] [evidence IEA]	mKIAA4117; mDia2; 4930417P13Rik; p134MDia2; Dia2; KIAA4117	mKIAA4117; mDia2; 4930417P13Rik; p134MDia2; Dia2; KIAA4117
5550091	0.428197	7.09225	4.44907	0.00143354	0.00600744	-2.78293	Mus musculus	RefSeq	ILMN_219921	ILMN_219921	RNMTL1	NM_183263.3	NM_183263.3	NA	67390	146198745	NM_183263.3	Rnmtl1	NP_899086.1	ILMN_2715234	5550091	S	1099	AACTGGCCGAGAGTACCGGTGGCAAGAGACTGCTGATCCCCGTTGTACCT				11qB5	Mus musculus RNA methyltransferase like 1 (Rnmtl1), mRNA.		Any process involved in the conversion of one or more primary RNA transcripts into one or more mature RNA molecules [goid 6396] [evidence IEA]	Catalysis of the transfer of a methyl group to an acceptor molecule [goid 8168] [evidence IEA]; Catalysis of the transfer of a group, e.g. a methyl group, glycosyl group, acyl group, phosphorus-containing, or other groups, from one compound (generally regarded as the donor) to another compound (generally regarded as the acceptor). Transferase is the systematic name for any enzyme of EC class 2 [g…	RP23-147P4.7; 4833420N02Rik; AI255153; HC90	4833420N02Rik; AI255153; RP23-147P4.7; HC90
6660576	0.467885	8.32744	4.44886	0.00143398	0.00600832	-2.78325	Mus musculus	RefSeq	ILMN_219918	ILMN_219918	GOLGA2	NM_133852.2	NM_133852.2	NA	99412	124378041	NM_133852.2	Golga2	NP_598613.2	ILMN_2715198	6660576	S	4307	GGCTGGGAACCTTATTTATTGGTAGTGTTAGGTCAGAGGGCAGGAGGCGG	2	+	32163306-32163355	2qB	Mus musculus golgi autoantigen, golgin subfamily a, 2 (Golga2), transcript variant 1, mRNA. XM_917195 XM_924742 XM_924744 XM_924745 XM_924752 XM_924758 XM_990733 XM_990778 XM_990810 XM_990841 XM_990863	The network of interconnected tubular and cisternal structures located at the convex side of the Golgi apparatus, which abuts the endoplasmic reticulum [goid 5801] [evidence IDA]; Double layer of lipid molecules that encloses all cells, and, in eukaryotes, many organelles; may be a single or double lipid bilayer; also includes associated proteins [goid 16020] [evidence IEA]; A compound membranous…			GM 130; golgin-95; KIAA4150; AW555139; GM-130; mKIAA4150; GM130	GM 130; golgin-95; KIAA4150; AW555139; GM-130; mKIAA4150; GM130
4590441	-0.38663	7.2752	-4.44715	0.00143766	0.00602078	-2.78598	Mus musculus	RefSeq	ILMN_210624	ILMN_230242	SDCCAG1	NM_025441.2	NM_025441.2	NA	66244	32130520	NM_025441.2	Sdccag1	NP_079717.2	ILMN_1247242	4590441	S	1809	TCCACGGACTTTGACTGAAGCAGGCACAATGGCACTTTGCTACAGTGCTG	12	-	70428670-70428719	12qC2	Mus musculus serologically defined colon cancer antigen 1 (Sdccag1), mRNA.	A membrane-bounded organelle of eukaryotic cells in which chromosomes are housed and replicated. In most cells, the nucleus contains all of the cell's chromosomes except the organellar chromosomes, and is the site of RNA synthesis and processing. In some species, or in specialized cell types, RNA metabolism or DNA replication may be absent [goid 5634] [evidence IEA]			1500011I12Rik; 4933405E14Rik	1500011I12Rik; 4933405E14Rik
6590201	0.659362	7.36076	4.44036	0.00145228	0.00607609	-2.79674	Mus musculus	RefSeq	ILMN_212114	ILMN_212114	2210016L21RIK	NM_028211.1	NM_028211.1	NA	72357	39930440	NM_028211.1	2210016L21Rik	NP_082487.1	ILMN_1247760	6590201	S	386	TCACATCCATCCCCGGAGGCCATAAGAAGGAAGCCTCTCCAAGACCCTGC	5	+	115397187-115397236	5qF	Mus musculus RIKEN cDNA 2210016L21 gene (2210016L21Rik), mRNA.
5690327	-0.86801	8.09097	-4.42465	0.00148675	0.00620008	-2.82167	Mus musculus	RefSeq	ILMN_209017	ILMN_209017	TMEM49	NM_029478.3	NM_029478.3	NA	75909	142367994	NM_029478.3	Tmem49	NP_083754.2	ILMN_2616768	5690327	S	354	TTTTACTGCTGCTTGCTGCGCTTGTAGCTACGTATTATGTGGAAGGAGCG	11	-	86476993-86477042	11qC	Mus musculus transmembrane protein 49 (Tmem49), mRNA.	Penetrating at least one phospholipid bilayer of a membrane. May also refer to the state of being buried in the bilayer with no exposure outside the bilayer. When used to describe a protein, indicates that all or part of the peptide sequence is embedded in the membrane [goid 16021] [evidence IEA]; Double layer of lipid molecules that encloses all cells, and, in eukaryotes, many organelles; may be…			ni-2; 4930579A11Rik; 3110098I04Rik; AI787464	3110098I04Rik; ni-2; 4930579A11Rik; AI787464
10767	-1.27413	7.24121	-4.40984	0.00152004	0.00632457	-2.84521	Mus musculus	RefSeq	ILMN_219982	ILMN_219982	KLHL13	NM_026167.3	NM_026167.3	NA	67455	146134897	NM_026167.3	Klhl13	NP_080443.1	ILMN_1215124	10767	S	3093	CTCTTGGTTCATGAGGTTATTTAGCACAAAGTGTAACAGCTTCACCTGGG				XqA2	Mus musculus kelch-like 13 (Drosophila) (Klhl13), mRNA.		The chemical reactions and pathways resulting in the breakdown of a protein or peptide by hydrolysis of its peptide bonds, initiated by the covalent attachment of a ubiquitin moiety, or multiple ubiquitin moieties, to the protein [goid 6511] [evidence IEA]	Interacting selectively with any protein or protein complex (a complex of two or more proteins that may include other nonprotein molecules) [goid 5515] [evidence IEA]	AI451128; Bklhd2; mKIAA1309; 1200009K10Rik; D130072F20Rik	AI451128; Bklhd2; mKIAA1309; 1200009K10Rik; D130072F20Rik
2750273	-0.605967	7.45756	-4.3943	0.00155582	0.0064546	-2.86993	Mus musculus	RefSeq	ILMN_186272	ILMN_186272	UHRF2	NM_144873.2	NM_144873.2	NA	109113	124430765	NM_144873.2	Uhrf2	NP_659122.2	ILMN_1221103	2750273	S	666	GTGGATGCCAGAGATGTCGGCCTTGGTGCTTGGTTTGAAGCACATATACA	19	+	30130737-30130786	19qC1	Mus musculus ubiquitin-like, containing PHD and RING finger domains 2 (Uhrf2), mRNA.	A membrane-bounded organelle of eukaryotic cells in which chromosomes are housed and replicated. In most cells, the nucleus contains all of the cell's chromosomes except the organellar chromosomes, and is the site of RNA synthesis and processing. In some species, or in specialized cell types, RNA metabolism or DNA replication may be absent [goid 5634] [evidence ISS]	The process whereby relatively unspecialized cells, e.g. embryonic or regenerative cells, acquire specialized structural and/or functional features that characterize the cells, tissues, or organs of the mature organism or some other relatively stable phase of the organism's life history. Differentiation includes the processes involved in commitment of a cell to a specific fate [goid 30154] [evide…	Interacting selectively with any protein or protein complex (a complex of two or more proteins that may include other nonprotein molecules) [goid 5515] [evidence ISS]; Catalysis of the reaction: ATP + ubiquitin + protein lysine = AMP + diphosphate + protein N-ubiquityllysine [goid 4842] [evidence ISS]; Interacting selectively with zinc (Zn) ions [goid 8270] [evidence IEA]; Interacting selectively…	AI426270; Nirf; AW214556; 2310065A22Rik; D130071B19Rik	AI426270; Nirf; AW214556; 2310065A22Rik; D130071B19Rik
2600343	0.633253	9.97645	4.38413	0.00157973	0.00654131	-2.88614	Mus musculus	RefSeq	ILMN_212502	ILMN_212502	ANP32A	NM_009672.2	NM_009672.2	NA	11737	40254599	NM_009672.2	Anp32a	NP_033802.2	ILMN_1230271	2600343	S	826	CCTGTTTGGGGAAATTCCTATTGTGATTTGACTGTTTTTACCCATATCCC	9	+	62225431-62225480	9qB	Mus musculus acidic (leucine-rich) nuclear phosphoprotein 32 family, member A (Anp32a), mRNA.	All of the contents of a cell excluding the plasma membrane and nucleus, but including other subcellular structures [goid 5737] [evidence IEA]; A membrane-bounded organelle of eukaryotic cells in which chromosomes are housed and replicated. In most cells, the nucleus contains all of the cell's chromosomes except the organellar chromosomes, and is the site of RNA synthesis and processing. In some …	Any process that modulates the frequency, rate or extent of DNA-dependent transcription [goid 6355] [evidence IEA]; The synthesis of either RNA on a template of DNA or DNA on a template of RNA [goid 6350] [evidence IEA]	Interacting selectively with any protein or protein complex (a complex of two or more proteins that may include other nonprotein molecules) [goid 5515] [evidence IEA]	pp32; W91701; PHAP1; I1PP2A; LANP; Anp32	pp32; W91701; PHAP1; I1PP2A; LANP; Anp32
2370022	-0.97935	4.18375	-4.38408	0.00157985	0.00654131	-2.88622	Mus musculus	RefSeq	ILMN_254946	ILMN_254946	DEFB18	NM_001039123.1	NM_001039123.1	NA	654460	84993771	NM_001039123.1	Defb18	NP_001034212.1	ILMN_3162156	2370022	S	174	CTACTGTCACACTGAGCCCTGCTGTGTGGTGCGAGAATACAAAAGAATGG	1	-	18226588-18226637	1qA3	Mus musculus defensin beta 18 (Defb18), mRNA.	The space external to the outermost structure of a cell. For cells without external protective or external encapsulating structures this refers to space outside of the plasma membrane. This term covers the host cell environment outside an intracellular parasite [goid 5576] [evidence IEA]	Reactions triggered in response to the presence of a bacterium that act to protect the cell or organism [goid 42742] [evidence IEA]		Defb18	Defb18
610139	1.74176	4.32534	4.37418	0.00160348	0.00662901	-2.90199	Mus musculus	RefSeq	ILMN_214707	ILMN_214707	ACBD5	NM_028793.2	NM_028793.2	NA	74159	133892632	NM_028793.2	Acbd5	NP_083069.1	ILMN_2682307	610139	S	220	ACAAACAGGCAACTGAAGGACCCTGTAAACTTTCACGGCCTGGATTCTGG	2	+	22931058-22931107	2qA3	Mus musculus acyl-Coenzyme A binding domain containing 5 (Acbd5), mRNA.	Penetrating at least one phospholipid bilayer of a membrane. May also refer to the state of being buried in the bilayer with no exposure outside the bilayer. When used to describe a protein, indicates that all or part of the peptide sequence is embedded in the membrane [goid 16021] [evidence IEA]; The part of a cell or its extracellular environment in which a gene product is located. A gene produ…	Any process specifically pertinent to the functioning of integrated living units: cells, tissues, organs, and organisms. A process is a collection of molecular events with a defined beginning and end [goid 8150] [evidence ND ]; The directed movement of substances (such as macromolecules, small molecules, ions) into, out of, within or between cells, or within a multicellular organism [goid 6810] […	Elemental activities, such as catalysis or binding, describing the actions of a gene product at the molecular level. A given gene product may exhibit one or more molecular functions [goid 3674] [evidence ND ]; Interacting selectively with a lipid [goid 8289] [evidence IEA]; The selective, often stoichiometric, interaction of a molecule with one or more specific sites on another molecule [goid 548…	1300014E15Rik; MGC90942	1300014E15Rik; MGC90942
4590082	-0.647803	8.58229	-4.37085	0.00161153	0.00666099	-2.90731	Mus musculus	RefSeq	ILMN_187383	ILMN_187383	UBE2G1	NM_025985.4	NM_025985.4	NA	67128	115292440	NM_025985.4	Ube2g1	NP_080261.2	ILMN_2482026	4590082	S	696	AGTGTCATTTCTATGCTGGCAGATCCTAATGGAGACTCACCTGCAAATGT	11	+	72491326-72491375	11qB4	Mus musculus ubiquitin-conjugating enzyme E2G 1 (UBC7 homolog, C. elegans) (Ube2g1), mRNA.		The chemical reactions and pathways resulting in the breakdown of a protein or peptide by hydrolysis of its peptide bonds, initiated by the covalent attachment of a ubiquitin moiety, or multiple ubiquitin moieties, to the protein [goid 6511] [evidence IEA]; The covalent alteration of one or more amino acids occurring in a protein after the protein has been completely translated and released from …	Catalysis of the ligation of two substances with concomitant breaking of a diphosphate linkage, usually in a nucleoside triphosphate. Ligase is the systematic name for any enzyme of EC class 6 [goid 16874] [evidence IEA]; Catalysis of ATP-dependent isopeptide bond formation between the carboxy-terminal residues of a small conjugating protein such as ubiquitin or a ubiquitin-like protein, and a su…	D130023C12Rik; AU014992; AI256795; AW552068; 2700059C12Rik	D130023C12Rik; AU014992; AI256795; AW552068; 2700059C12Rik
7200471	-0.538494	8.16211	-4.36407	0.00162803	0.00671948	-2.91813	Mus musculus	RefSeq	ILMN_218947	ILMN_218947	DMTF1	NM_011806.2	NM_011806.2	NA	23857	31560525	NM_011806.2	Dmtf1	NP_035936.2	ILMN_1231803	7200471	S	2331	CGTTCCTTCACCTCATGGCTTTATCCAGGCATCTGATGTTATAGATACTG	5	-	9120379-9120428	5qA1	Mus musculus cyclin D binding myb-like transcription factor 1 (Dmtf1), mRNA.	A membrane-bounded organelle of eukaryotic cells in which chromosomes are housed and replicated. In most cells, the nucleus contains all of the cell's chromosomes except the organellar chromosomes, and is the site of RNA synthesis and processing. In some species, or in specialized cell types, RNA metabolism or DNA replication may be absent [goid 5634] [evidence IEA]	Any process that stops, prevents or reduces the rate or extent of progression through the cell cycle [goid 45786] [evidence IEA]; Any process that modulates the frequency, rate or extent of DNA-dependent transcription [goid 6355] [evidence IEA]; The synthesis of either RNA on a template of DNA or DNA on a template of RNA [goid 6350] [evidence IEA]; The progression of biochemical and morphological…	Interacting selectively with DNA (deoxyribonucleic acid) [goid 3677] [evidence IEA]	Dmp1; Dimp	Dmp1; Dimp
6060593	-0.42438	5.54836	-4.36372	0.00162887	0.00672131	-2.91867	Mus musculus	RefSeq	ILMN_221578	ILMN_221578	LRRC46	NM_027026.2	NM_027026.2	NA	69297	31982633	NM_027026.2	Lrrc46	NP_081302.2	ILMN_2737412	6060593	S	1077	CCTCAACTCAGACTGCCTCTACTACCAAGAAACAGGTTTCCAAGAACCAG	11	-	96896087-96896136	11qD	Mus musculus leucine rich repeat containing 46 (Lrrc46), mRNA.			Interacting selectively with any protein or protein complex (a complex of two or more proteins that may include other nonprotein molecules) [goid 5515] [evidence IEA]	1700006D24Rik	1700006D24Rik
2650201	1.43302	4.07871	4.33801	0.00169313	0.00695242	-2.95975	Mus musculus	RefSeq	ILMN_209816	ILMN_209816	TEX11	NM_031384.1	NM_031384.1	NA	83558	13878210	NM_031384.1	Tex11	NP_113561.1	ILMN_2599470	2650201	S	3107	AAGCAGACTAGCTCACAGCAACTTGAAGGTGTATATTCATGAGCCGCTGA	X	-	98034078-98034127	XqC3	Mus musculus testis expressed gene 11 (Tex11), mRNA.				4930565P14Rik; BB024231	4930565P14Rik; BB024231
2970196	-0.509344	8.07744	-4.31931	0.00174154	0.00712731	-2.98968	Mus musculus	RefSeq	ILMN_214904	ILMN_214904	TMED4	NM_134020.1	NM_134020.1	NA	103694	19527235	NM_134020.1	Tmed4	NP_598781.1	ILMN_2698606	2970196	S	482	GCTCGCCAGTTGCTTGACCAGGTGGAACAGATCCAGAAGGAGCAGGATTA	11	-	6173750-6173799	11qA1	Mus musculus transmembrane emp24 protein transport domain containing 4 (Tmed4), mRNA.	Double layer of lipid molecules that encloses all cells, and, in eukaryotes, many organelles; may be a single or double lipid bilayer; also includes associated proteins [goid 16020] [evidence IEA]; Penetrating at least one phospholipid bilayer of a membrane. May also refer to the state of being buried in the bilayer with no exposure outside the bilayer. When used to describe a protein, indicates …	The directed movement of substances (such as macromolecules, small molecules, ions) into, out of, within or between cells, or within a multicellular organism [goid 6810] [evidence IEA]		1110014L17Rik; RP23-198N14.6; AI326346	1110014L17Rik; RP23-198N14.6; AI326346
6770519	-0.831637	6.67423	-4.30105	0.00179023	0.00730448	-3.01893	Mus musculus	RefSeq	ILMN_222859	ILMN_222859	HOXA4	NM_008265.3	NM_008265.3	NA	15401	142381148	NM_008265.3	Hoxa4	NP_032291.1	ILMN_2755860	6770519	S	1122	TAAGAAAGCACTGGCCATCGACTACCTTTGAGTCAGCCAGACAGCACGTG	6	-	52140042-52140091	6qB3	Mus musculus homeo box A4 (Hoxa4), mRNA.	A membrane-bounded organelle of eukaryotic cells in which chromosomes are housed and replicated. In most cells, the nucleus contains all of the cell's chromosomes except the organellar chromosomes, and is the site of RNA synthesis and processing. In some species, or in specialized cell types, RNA metabolism or DNA replication may be absent [goid 5634] [evidence IEA]	Any process that modulates the frequency, rate or extent of DNA-dependent transcription [goid 6355] [evidence IEA]; The biological process whose specific outcome is the progression of a multicellular organism over time from an initial condition (e.g. a zygote or a young adult) to a later condition (e.g. a multicellular animal or an aged adult) [goid 7275] [evidence IDA]; The regionalization proce…	Interacting selectively with DNA (deoxyribonucleic acid) [goid 3677] [evidence TAS]; Interacting selectively with DNA of a specific nucleotide composition, e.g. GC-rich DNA binding, or with a specific sequence motif or type of DNA e.g. promotor binding or rDNA binding [goid 43565] [evidence IEA]; The function of binding to a specific DNA sequence in order to modulate transcription. The transcript…	MGC130055; Hox-1.4; AV206827	MGC130055; Hox-1.4; AV206827
510736	-0.1768	10.7929	-4.29937	0.00179479	0.00731966	-3.02163	Mus musculus	RefSeq	ILMN_214892	ILMN_214892	FBXO28	NM_175127.2	NM_175127.2	NA	67948	65301478	NM_175127.2	Fbxo28	NP_780336.1	ILMN_2653143	510736	S	2277	CTTGTAACTGGAAAAGCCTGTCTTGCGCTGTCAGCCTCCTGAATGGTCAC	1	-	184245819-184245868	1qH5	Mus musculus F-box protein 28 (Fbxo28), mRNA.	The part of a cell or its extracellular environment in which a gene product is located. A gene product may be located in one or more parts of a cell and its location may be as specific as a particular macromolecular complex, that is, a stable, persistent association of macromolecules that function together [goid 5575] [evidence ND ]	Any process specifically pertinent to the functioning of integrated living units: cells, tissues, organs, and organisms. A process is a collection of molecular events with a defined beginning and end [goid 8150] [evidence ND ]; The chemical reactions and pathways resulting in the breakdown of a protein or peptide by hydrolysis of its peptide bonds, initiated by the covalent attachment of a ubiqui…	Elemental activities, such as catalysis or binding, describing the actions of a gene product at the molecular level. A given gene product may exhibit one or more molecular functions [goid 3674] [evidence ND ]	mKIAA0483; MGC90899; KIAA0483; Fbx28; D1Ertd578e; 5730505P19Rik; 4833428J17Rik	mKIAA0483; MGC90899; KIAA0483; Fbx28; D1Ertd578e; 5730505P19Rik; 4833428J17Rik
6370343	0.735301	6.44189	4.29936	0.00179481	0.00731966	-3.02164	Mus musculus	RefSeq	ILMN_215445	ILMN_215445	LENG1	NM_027203.3	NM_027203.3	NA	69757	118130331	NM_027203.3	Leng1	NP_081479.1	ILMN_1234337	6370343	S	1813	GGCCTAAGGTTATTAAGTGACACTGAGGAGTAGGGACCAACAGGTGGCCT	7	-	3612059-3612108	7qA1	Mus musculus leukocyte receptor cluster (LRC) member 1 (Leng1), mRNA.				1500001K17Rik	1500001K17Rik
3440224	-1.38054	4.56347	-4.29096	0.00181776	0.00740505	-3.03512	Mus musculus	RefSeq	ILMN_218516	ILMN_246864	LYPD6	NM_177139.3	NM_177139.3	NA	320343	47271527	NM_177139.3	Lypd6	NP_796113.1	ILMN_2729745	3440224	S	2390	CCCGCTCAGGCACCAAATCTGAACCGACGGCAGAAACTCTGATGCAAGTC	2	+	50047975-50048024	2qC1.1	Mus musculus LY6/PLAUR domain containing 6 (Lypd6), mRNA.	The space external to the outermost structure of a cell. For cells without external protective or external encapsulating structures this refers to space outside of the plasma membrane. This term covers the host cell environment outside an intracellular parasite [goid 5576] [evidence IEA]			E130115E03Rik	E130115E03Rik
5360386	1.33221	3.85119	4.27006	0.00187621	0.00762639	-3.06868	Mus musculus	RefSeq	ILMN_211127	ILMN_211127	ANAPC10	NM_026904.2	NM_026904.2	NA	68999	118130278	NM_026904.2	Anapc10	NP_081180.1	ILMN_2740930	5360386	S	2644	TGAACATTGTGTCCTTAGATAGCCAGTTTCTGCTCAGTGGCCACCTGGCC	8	+	82301062-82301111	8qC2	Mus musculus anaphase promoting complex subunit 10 (Anapc10), mRNA.	A ubiquitin ligase complex that degrades mitotic cyclins and anaphase inhibitory protein, thereby triggering sister chromatid separation and exit from mitosis. Substrate recognition by APC occurs through degradation signals, the most common of which is termed the Dbox degradation motif, originally discovered in cyclin B [goid 5680] [evidence IEA]	Progression through mitosis, the division of the eukaryotic cell nucleus to produce two daughter nuclei that, usually, contain the identical chromosome complement to their mother [goid 7067] [evidence IEA]; The chemical reactions and pathways resulting in the breakdown of a protein or peptide by hydrolysis of its peptide bonds, initiated by the covalent attachment of a ubiquitin moiety, or multip…	Interacting selectively with any protein or protein complex (a complex of two or more proteins that may include other nonprotein molecules) [goid 5515] [evidence IEA]	1500026N15Rik; A830003M23Rik; APC10	1500026N15Rik; A830003M23Rik; APC10
3890538	0.348503	10.6629	4.26359	0.00189472	0.00769172	-3.07909	Mus musculus	RefSeq	ILMN_221665	ILMN_221665	ARL2BP	NM_024191.1	NM_024191.1	NA	107566	18859590	NM_024191.1	Arl2bp	NP_077153.1	ILMN_2745037	3890538	S	1088	CTGCGATTACAGCTTGATTGGCTGTGGGGATCCACCGAGAGAGCTGCCCT	8	+	97197505-97197554	8qC5	Mus musculus ADP-ribosylation factor-like 2 binding protein (Arl2bp), transcript variant 1, mRNA.	All of the contents of a cell excluding the plasma membrane and nucleus, but including other subcellular structures [goid 5737] [evidence IEA]; A semiautonomous, self replicating organelle that occurs in varying numbers, shapes, and sizes in the cytoplasm of virtually all eukaryotic cells. It is notably the site of tissue respiration [goid 5739] [evidence IEA]; That fraction of cells, prepared by…	Any process specifically pertinent to the functioning of integrated living units: cells, tissues, organs, and organisms. A process is a collection of molecular events with a defined beginning and end [goid 8150] [evidence ND ]	Interacting selectively with any protein or protein complex (a complex of two or more proteins that may include other nonprotein molecules) [goid 5515] [evidence ISO]; Increases the activity of a GTPase, an enzyme that catalyzes the hydrolysis of GTP [goid 5096] [evidence ISO]; Modulates the rate of GTP hydrolysis by a small monomeric GTPase [goid 5083] [evidence ISO]	6330544B05Rik; Bart1; 1700027H16Rik; 1700010P10Rik; AI482273; AI849834	6330544B05Rik; Bart1; 1700027H16Rik; 1700010P10Rik; AI482273; AI849834
150435	-0.537019	8.52692	-4.25889	0.00190827	0.00773938	-3.08664	Mus musculus	RefSeq	ILMN_215687	ILMN_314460	LOC621824	XR_031998.1	XR_031998.1	NA	621824	149264509	XR_031998.1	LOC621824		ILMN_2736999	150435	S	913	CCCCCCACCCAACCCTCATCACACACTGGATGCCATATGGATCTCTCTAC				13qC1	PREDICTED: Mus musculus similar to integrin-linked kinase ILK (LOC621824), misc RNA.
1740477	-1.18569	4.24985	-4.24989	0.00193454	0.00782618	-3.10114	Mus musculus	RefSeq	ILMN_196772	ILMN_196772	H2-Q1	NM_010390.2	NM_010390.2	NA	15006	47551350	NM_010390.2	H2-Q1	NP_034520.1	ILMN_1216688	1740477	S	996	TGTGATGAAGAGGAGGAGAAACAAAGGTGGACAAGGAGAGGACTGTGCTC	17	+	35459135-35459184	17qB1	Mus musculus histocompatibility 2, Q region locus 1 (H2-Q1), mRNA.	A transmembrane protein complex composed of a MHC class I alpha chain and an invariant beta2-microglobin chain, and with or without a bound peptide antigen. Class I here refers to classical class I molecules [goid 42612] [evidence IEA]; Double layer of lipid molecules that encloses all cells, and, in eukaryotes, many organelles; may be a single or double lipid bilayer; also includes associated pr…	Any immune system process that functions in the calibrated response of an organism to a potential internal or invasive threat [goid 6955] [evidence IEA]; The process by which an antigen-presenting cell expresses a peptide antigen of endogenous origin on its cell surface in association with an MHC class I protein complex. The peptide antigen is typically, but not always, processed from a whole pro…	Interacting selectively with an antigen peptide, a fragment of a foreign protein derived by proteolysis within the cell [goid 42605] [evidence IDA]; Interacting selectively with an antigen peptide, a fragment of a foreign protein derived by proteolysis within the cell [goid 42605] [evidence IC ]	Qed-1; H-2Q1; Qa1; Q1k; Q1d; MGC91064; Qa-1; Q1b	Qed-1; H-2Q1; Qa1; Q1k; Q1d; MGC91064; Qa-1; Q1b
730338	-0.232515	10.8356	-4.24687	0.00194342	0.00785716	-3.10599	Mus musculus	RefSeq	ILMN_186385	ILMN_186385	ZMPSTE24	NM_172700.2	NM_172700.2	NA	230709	118129981	NM_172700.2	Zmpste24	NP_766288.1	ILMN_1248079	730338	S	3040	CCAGTGGGAAAAGGTATGTGCTTGACTGCTTCAAATGTCTGTCCACGTCC	4	-	120732183-120732232	4qD2.2	Mus musculus zinc metallopeptidase, STE24 homolog (S. cerevisiae) (Zmpste24), mRNA.	That fraction of cells, prepared by disruptive biochemical methods, that includes the plasma and other membranes [goid 5624] [evidence IDA]; A compound membranous cytoplasmic organelle of eukaryotic cells, consisting of flattened, ribosome-free vesicles arranged in a more or less regular stack. The Golgi apparatus differs from the endoplasmic reticulum in often having slightly thicker membranes, …	A process that is carried out at the cellular level which results in the formation, arrangement of constituent parts, or disassembly of the nuclear membrane [goid 6998] [evidence IMP]; A process that is carried out at the cellular level which results in the formation, arrangement of constituent parts, or disassembly of the nuclear membrane [goid 6998] [evidence IGI]; The chemical reactions and pa…	Catalysis of the hydrolysis of internal, alpha-peptide bonds in a polypeptide chain by a mechanism in which water acts as a nucleophile, one or two metal ions hold the water molecule in place, and charged amino acid side chains are ligands for the metal ions [goid 4222] [evidence IDA]; Catalysis of the hydrolysis of internal, alpha-peptide bonds in a polypeptide chain by a mechanism in which wate…	D030046F19; STE24; MADB; Face-1; Ste24p; FACE1; A530043O15Rik	D030046F19; STE24; MADB; Face-1; Ste24p; FACE1; A530043O15Rik
3370192	0.397451	8.83038	4.24187	0.00195825	0.00791212	-3.11404	Mus musculus	RefSeq	ILMN_210983	ILMN_210983	DGCR6	NM_010047.3	NM_010047.3	NA	13353	145966785	NM_010047.3	Dgcr6	NP_034177.1	ILMN_2611284	3370192	S	740	GCAGAGCACACTGGAGAAGGCAGGGGTAGCTGGTTTCTACGTGACCACCA				16qA3	Mus musculus DiGeorge syndrome critical region gene 6 (Dgcr6), mRNA.	The part of a cell or its extracellular environment in which a gene product is located. A gene product may be located in one or more parts of a cell and its location may be as specific as a particular macromolecular complex, that is, a stable, persistent association of macromolecules that function together [goid 5575] [evidence ND ]	Any process specifically pertinent to the functioning of integrated living units: cells, tissues, organs, and organisms. A process is a collection of molecular events with a defined beginning and end [goid 8150] [evidence ND ]	Elemental activities, such as catalysis or binding, describing the actions of a gene product at the molecular level. A given gene product may exhibit one or more molecular functions [goid 3674] [evidence ND ]	AU044152	AU044152
1990438	0.772043	5.7875	4.22966	0.00199495	0.00804651	-3.13372	Mus musculus	RefSeq	ILMN_218370	ILMN_218370	DNAIC1	NM_175138.3	NM_175138.3	NA	68922	142383967	NM_175138.3	Dnaic1	NP_780347.1	ILMN_2694884	1990438	S	2107	GTGCAGTTCAATCCCATCCACCCCATCATAATCGTGGGCGACGACCGTGG	4	+	41582082-41582131	4qA5	Mus musculus dynein, axonemal, intermediate chain 1 (Dnaic1), mRNA.	Any of several large complexes that contain two or three dynein heavy chains and several light chains, and have microtubule motor activity [goid 30286] [evidence IEA]; Any of the long, generally straight, hollow tubes of internal diameter 12-15 nm and external diameter 24 nm found in a wide variety of eukaryotic cells; each consists (usually) of 13 protofilaments of polymeric tubulin, staggered i…		Catalysis of movement along a polymeric molecule such as a microfilament or microtubule, coupled to the hydrolysis of a nucleoside triphosphate [goid 3774] [evidence IEA]	BB124644; 1110066F04Rik	BB124644; 1110066F04Rik
4210719	0.306926	9.36252	4.21207	0.00204912	0.00824169	-3.1621	Mus musculus	RefSeq	ILMN_217868	ILMN_217868	PPTC7	NM_177242.4	NM_177242.4	NA	320717	118130366	NM_177242.4	Pptc7	NP_796216.2	ILMN_2688607	4210719	S	4474	CTGTTGAGACTATCATCGTGCGTCCTACCAGAGGCAATGACCCGAATCGA	5	+	122774153-122774202	5qF	Mus musculus PTC7 protein phosphatase homolog (S. cerevisiae) (Pptc7), mRNA.			Catalysis of the hydrolysis of various bonds, e.g. C-O, C-N, C-C, phosphoric anhydride bonds, etc. Hydrolase is the systematic name for any enzyme of EC class 3 [goid 16787] [evidence IEA]; Interacting selectively with magnesium (Mg) ions [goid 287] [evidence IEA]; Interacting selectively with manganese (Mn) ions [goid 30145] [evidence IEA]; Catalysis of the reaction: a phosphoprotein + H2O = a p…	AA672638; AI848390; TA-PP2C; 9130017A15Rik	AA672638; AI848390; TA-PP2C; 9130017A15Rik
5890164	-0.25772	12.2264	-4.20736	0.00206387	0.00829972	-3.16969	Mus musculus	RefSeq	ILMN_223932	ILMN_240636	NEDD8	NM_008683.3	NM_008683.3	NA	18002	141803217	NM_008683.3	Nedd8	NP_032709.1	ILMN_1256971	5890164	S	345	ACTTGGTTCCGTTTACCTCCTTGCCCTGCCAATCATAATGTGGCATCACA	14	-	56281311-56281360	14qC3	Mus musculus neural precursor cell expressed, developmentally down-regulated gene 8 (Nedd8), mRNA.	A membrane-bounded organelle of eukaryotic cells in which chromosomes are housed and replicated. In most cells, the nucleus contains all of the cell's chromosomes except the organellar chromosomes, and is the site of RNA synthesis and processing. In some species, or in specialized cell types, RNA metabolism or DNA replication may be absent [goid 5634] [evidence IDA]; A membrane-bounded organelle …	The chemical reactions and pathways resulting in the breakdown of a protein or peptide by hydrolysis of its peptide bonds, initiated by the covalent attachment of a ubiquitin moiety, or multiple ubiquitin moieties, to the protein [goid 6511] [evidence IEA]; Any process by which a protein is transported to, or maintained in, a specific location [goid 8104] [evidence IDA]; Any process that modulate…	Interacting selectively with any protein or protein complex (a complex of two or more proteins that may include other nonprotein molecules) [goid 5515] [evidence IPI]	Rub1	Rub1
5270711	-0.871071	6.66544	-4.19949	0.00208881	0.00839346	-3.18242	Mus musculus	RefSeq	ILMN_222877	ILMN_222877	DTWD1	NM_026981.1	NM_026981.1	NA	69185	21312231	NM_026981.1	Dtwd1	NP_081257.1	ILMN_2756074	5270711	S	1021	CTTGTCCTGGGCTCTTGCAGTCGAGCCTTGTTTACTCCGGGGTGGTAACC	2	+	125990725-125990774	2qF1	Mus musculus DTW domain containing 1 (Dtwd1), mRNA.				1810033A06Rik	1810033A06Rik
3180367	0.265621	9.92776	4.18624	0.00213148	0.00854622	-3.20383	Mus musculus	RefSeq	ILMN_210969	ILMN_210969	STARD7	NM_139308.1	NM_139308.1	NA	99138	21314859	NM_139308.1	Stard7	NP_647469.2	ILMN_2676066	3180367	S	2455	GTAGGGATGGGGCTTTTGTGACCTCTTGGTCTTGTAAAGCATTTCTCTCC	2	+	127124017-127124066	2qF1	Mus musculus START domain containing 7 (Stard7), mRNA.				AL022671; AW544915; MGC27663; AI852671	AL022671; AW544915; MGC27663; AI852671
2340689	-1.37665	4.34228	-4.14425	0.00227297	0.00906403	-3.27184	Mus musculus	RefSeq	ILMN_216364	ILMN_216364	NAT5	NM_026425.2	NM_026425.2	NA	67877	142348913	NM_026425.2	Nat5	NP_080701.1	ILMN_1223543	2340689	S	214	AGTACAGTACCACTAGTACTTTTTTGGTTATGGGCAAAGCAGAAGGCTCG	2	+	145734327-145734351:145737244-145737268	2qG1	Mus musculus N-acetyltransferase 5 (ARD1 homolog, S. cerevisiae) (Nat5), mRNA.		The chemical reactions and pathways, including anabolism and catabolism, by which living organisms transform chemical substances. Metabolic processes typically transform small molecules, but also include macromolecular processes such as DNA repair and replication, and protein synthesis and degradation [goid 8152] [evidence IEA]	Catalysis of the transfer of a group, e.g. a methyl group, glycosyl group, acyl group, phosphorus-containing, or other groups, from one compound (generally regarded as the donor) to another compound (generally regarded as the acceptor). Transferase is the systematic name for any enzyme of EC class 2 [goid 16740] [evidence IEA]; Catalysis of the generalized reaction: acyl-carrier + reactant = acyl…	D2Ertd186e; MGC144325; AU041458; 1500004D14Rik; 2900026I01Rik	D2Ertd186e; MGC144325; AU041458; 1500004D14Rik; 2900026I01Rik
5130424	0.566048	7.26851	4.13914	0.00229087	0.00912689	-3.28013	Mus musculus	RefSeq	ILMN_218677	ILMN_218677	SLC35F3	NM_175434.3	NM_175434.3	NA	210027	126723625	NM_175434.3	Slc35f3	NP_780643.2	ILMN_2698880	5130424	S	2190	GGAGAACTCAGTGCCTTCTACAGCATCTCTGTCCTATGTGAAGCGAGGTG	8	+	128919284-128919333	8qE2	Mus musculus solute carrier family 35, member F3 (Slc35f3), mRNA.	Penetrating at least one phospholipid bilayer of a membrane. May also refer to the state of being buried in the bilayer with no exposure outside the bilayer. When used to describe a protein, indicates that all or part of the peptide sequence is embedded in the membrane [goid 16021] [evidence IEA]; Double layer of lipid molecules that encloses all cells, and, in eukaryotes, many organelles; may be…	The directed movement of substances (such as macromolecules, small molecules, ions) into, out of, within or between cells, or within a multicellular organism [goid 6810] [evidence IEA]		MGC141263; MGC141264; B230375D17Rik	MGC141264; B230375D17Rik; MGC141263
3610523	-1.3707	4.04331	-4.12691	0.00233426	0.00928682	-3.29998	Mus musculus	RefSeq	ILMN_187319	ILMN_187319	TRPM7	NM_021450.1	NM_021450.1	NA	58800	10946829	NM_021450.1	Trpm7	NP_067425.1	ILMN_2443085	3610523	S	6514	AGCCATGATAAATAAGAATTAACTCACTGTTCAATGGGTGTTTCCTGTGA	2	-	126617825-126617874	2qF1	Mus musculus transient receptor potential cation channel, subfamily M, member 7 (Trpm7), mRNA.	The membrane surrounding a cell that separates the cell from its external environment. It consists of a phospholipid bilayer and associated proteins [goid 5886] [evidence IDA]; Projection at the leading edge of a crawling cell; the protrusions are supported by a microfilament meshwork [goid 1726] [evidence IDA]; Penetrating at least one phospholipid bilayer of a membrane. May also refer to the st…	The binding of a cell to the extracellular matrix via adhesion molecules that require the presence of calcium for the interaction [goid 16340] [evidence IDA]; The process of introducing a phosphate group on to a protein [goid 6468] [evidence IDA]; The phosphorylation by a protein of one or more of its own amino acid residues, or residues on an identical protein [goid 46777] [evidence IDA]; The di…	Interacting selectively with monomeric or multimeric forms of actin, including actin filaments [goid 3779] [evidence IDA]; Catalysis of the transfer of a phosphate group, usually from ATP, to a substrate molecule [goid 16301] [evidence IDA]; Interacting selectively with any part of a myosin complex; myosins are any of a superfamily of molecular motor proteins that bind to actin and use the energy…	CHAK; Ltrpc7; CHAK1; TRP-PLIK; 5033407O22Rik; Ltpr7; 4833414K03Rik; 2310022G15Rik	CHAK; Ltrpc7; CHAK1; TRP-PLIK; 5033407O22Rik; Ltpr7; 4833414K03Rik; 2310022G15Rik
5360703	0.240445	13.2625	4.09085	0.00246742	0.00977268	-3.35862	Mus musculus	RefSeq	ILMN_208689	ILMN_208689	NDUFA2	NM_010885.4	NM_010885.4	NA	17991	146134432	NM_010885.4	Ndufa2	NP_035015.2	ILMN_2588601	5360703	S	138	TCGTGCAACGGTACGTGGAGCTGAAGAAGGCGCACCCCAACCTGCCCATT				18qB2	Mus musculus NADH dehydrogenase (ubiquinone) 1 alpha subcomplex, 2 (Ndufa2), mRNA.	Double layer of lipid molecules that encloses all cells, and, in eukaryotes, many organelles; may be a single or double lipid bilayer; also includes associated proteins [goid 16020] [evidence IEA]; The inner, i.e. lumen-facing, lipid bilayer of the mitochondrial envelope. It is highly folded to form cristae [goid 5743] [evidence IEA]; The protein complexes that form the mitochondrial electron tra…	The directed movement of substances (such as macromolecules, small molecules, ions) into, out of, within or between cells, or within a multicellular organism [goid 6810] [evidence IEA]; A process whereby a series of electron carriers operate together to transfer electrons from donors to any of several different terminal electron acceptors to generate a transmembrane electrochemical gradient [goid…	Catalysis of the reaction: NADH + H+ + ubiquinone = NAD+ + ubiquinol [goid 8137] [evidence TAS]	AV000592; B8; C1-B8	AV000592; B8; C1-B8
6980709	1.17025	4.37574	4.08584	0.00248655	0.00984239	-3.36678	Mus musculus	RefSeq	ILMN_213777	ILMN_213777	MEPE	NM_053172.1	NM_053172.1	NA	94111	16716458	NM_053172.1	Mepe	NP_444402.1	ILMN_1222230	6980709	S	1202	CTTACACCGAATAAAGGGATGTCACAGCGGAGAGGCTCCTGGCCTTCGAG	5	+	104767197-104767246	5qE5	Mus musculus matrix extracellular phosphoglycoprotein with ASARM motif (bone) (Mepe), mRNA.	A layer consisting mainly of proteins (especially collagen) and glycosaminoglycans (mostly as proteoglycans) that forms a sheet underlying or overlying cells such as endothelial and epithelial cells. The proteins are secreted by cells in the vicinity [goid 5578] [evidence ISO]	The process whose specific outcome is the progression of the skeleton over time, from its formation to the mature structure. The skeleton is the bony framework of the body in vertebrates (endoskeleton) or the hard outer envelope of insects (exoskeleton or dermoskeleton) [goid 1501] [evidence TAS]; Any process that stops, prevents or reduces the frequency, rate or extent of bone mineralization [go…	Elemental activities, such as catalysis or binding, describing the actions of a gene product at the molecular level. A given gene product may exhibit one or more molecular functions [goid 3674] [evidence ND ]	OF45	OF45
6840241	-0.265403	10.9198	-4.08386	0.00249414	0.00986941	-3.37	Mus musculus	RefSeq	ILMN_187207	ILMN_187207	TRIP12	NM_133975.4	NM_133975.4	NA	14897	91932790	NM_133975.4	Trip12	NP_598736.4	ILMN_1237986	6840241	S	6116	ATTGCCGGACTACTCGAGCATTGACATAATGCGGGACAAACTCTTGATAG	1	-	84721230-84721279	1qC5	Mus musculus thyroid hormone receptor interactor 12 (Trip12), mRNA.		The chemical reactions and pathways resulting in the breakdown of a protein or peptide by hydrolysis of its peptide bonds, initiated by the covalent attachment of a ubiquitin moiety, or multiple ubiquitin moieties, to the protein [goid 6511] [evidence IEA]	Combining with an extracellular or intracellular messenger to initiate a change in cell activity [goid 4872] [evidence IEA]	6720416K24Rik; 1110036I07Rik; AA410158; MGC31615; Gtl6	6720416K24Rik; 1110036I07Rik; AA410158; MGC31615; Gtl6
2370575	-1.6565	5.23946	-4.08161	0.00250282	0.00989764	-3.37367	Mus musculus	RefSeq	ILMN_213667	ILMN_213667	ROCK2	NM_009072.2	NM_009072.2	NA	19878	134949012	NM_009072.2	Rock2	NP_033098.2	ILMN_1248041	2370575	S	4015	ATCACTTCCCAACCAACTGTGAGGCATGTATGAAGCCGCTGTGGCACATG	12	+	16984463-16984512	12qA1.1	Mus musculus Rho-associated coiled-coil containing protein kinase 2 (Rock2), mRNA.	All of the contents of a cell excluding the plasma membrane and nucleus, but including other subcellular structures [goid 5737] [evidence IEA]; Double layer of lipid molecules that encloses all cells, and, in eukaryotes, many organelles; may be a single or double lipid bilayer; also includes associated proteins [goid 16020] [evidence IEA]; The membrane surrounding a cell that separates the cell f…	A cellular process resulting in the division of the cytoplasm of a cell and its separation into two daughter cells. Cytokinesis usually occurs after growth, replication, and segregation of cellular components [goid 910] [evidence IEA]; The process of introducing a phosphate group on to a protein [goid 6468] [evidence IEA]; A series of reactions within the cell that occur as a result of a single t…	Catalysis of the transfer of a phosphate group, usually from ATP, to a substrate molecule [goid 16301] [evidence IEA]; Interacting selectively with diacylglycerol, a diester of glycerol and two fatty acids [goid 19992] [evidence IEA]; Interacting selectively with a nucleotide, any compound consisting of a nucleoside that is esterified with (ortho)phosphate or an oligophosphate at any hydroxyl gro…	Rho-kinase; mKIAA0619; ROKalpha; B230113H15Rik; Rock-II	Rho-kinase; mKIAA0619; ROKalpha; B230113H15Rik; Rock-II
780187	0.713902	7.30757	4.07974	0.00251007	0.0099202	-3.37672	Mus musculus	RefSeq	ILMN_213141	ILMN_213141	AK2	NM_016895.3	NM_016895.3	NA	11637	118131139	NM_016895.3	Ak2	NP_058591.2	ILMN_2660663	780187	S	732	ACAGAAGGCCAGGCGAGACCGCACCCCTGCTCATCTCCCCGCCGTGGGAT	4	+	128687814-128687863	4qD2.2	Mus musculus adenylate kinase 2 (Ak2), transcript variant 2, mRNA.	A semiautonomous, self replicating organelle that occurs in varying numbers, shapes, and sizes in the cytoplasm of virtually all eukaryotic cells. It is notably the site of tissue respiration [goid 5739] [evidence IDA]; The inner, i.e. lumen-facing, lipid bilayer of the mitochondrial envelope. It is highly folded to form cristae [goid 5743] [evidence IDA]	The chemical reactions and pathways involving nucleobases, nucleosides, nucleotides and nucleic acids [goid 6139] [evidence IEA]	Catalysis of the transfer of a group, e.g. a methyl group, glycosyl group, acyl group, phosphorus-containing, or other groups, from one compound (generally regarded as the donor) to another compound (generally regarded as the acceptor). Transferase is the systematic name for any enzyme of EC class 2 [goid 16740] [evidence IEA]; Catalysis of the transfer of a phosphate group, usually from ATP, to …	D4Ertd220e; Ak-2	D4Ertd220e; Ak-2
1710458	0.246988	9.16003	4.06184	0.00258039	0.0101731	-3.40591	Mus musculus	RefSeq	ILMN_211469	ILMN_211469	LETMD1	NM_134093.1	NM_134093.1	NA	68614	19527321	NM_134093.1	Letmd1	NP_598854.1	ILMN_2616215	1710458	S	1982	GTAGGGCTGTTTCTCCTCGTCACTATCATGGGCTAACTTCCACCCCTCCT	15	+	100309146-100309195	15qF1	Mus musculus LETM1 domain containing 1 (Letmd1), mRNA.	Penetrating at least one phospholipid bilayer of a membrane. May also refer to the state of being buried in the bilayer with no exposure outside the bilayer. When used to describe a protein, indicates that all or part of the peptide sequence is embedded in the membrane [goid 16021] [evidence IEA]; Double layer of lipid molecules that encloses all cells, and, in eukaryotes, many organelles; may be…			AI593524; MCC-32; HCCR-2; BB235638; 1110019O13Rik; BB130465; HCCR1; Mccr	AI593524; MCC-32; HCCR-2; BB235638; 1110019O13Rik; BB130465; HCCR1; Mccr
2900041	-0.790753	8.50218	-4.0538	0.00261265	0.0102845	-3.41903	Mus musculus	RefSeq	ILMN_186351	ILMN_232792	SLC25A36	NM_138756.4	NM_138756.4	NA	192287	146149334	NM_138756.4	Slc25a36	NP_620095.1	ILMN_2733277	2900041	S	2818	TTGCCTCTTCAGGTGCCACTGATACTGCCTAATACAGCGCCATTTGCTCT				9qE3.3	Mus musculus solute carrier family 25, member 36 (Slc25a36), mRNA.	The inner, i.e. lumen-facing, lipid bilayer of the mitochondrial envelope. It is highly folded to form cristae [goid 5743] [evidence IEA]; Penetrating at least one phospholipid bilayer of a membrane. May also refer to the state of being buried in the bilayer with no exposure outside the bilayer. When used to describe a protein, indicates that all or part of the peptide sequence is embedded in the…	The directed movement of substances (such as macromolecules, small molecules, ions) into, out of, within or between cells, or within a multicellular organism [goid 6810] [evidence IEA]; Transport of substances into, out of or within a mitochondrion [goid 6839] [evidence IEA]	Enables the directed movement of substances (such as macromolecules, small molecules, ions) into, out of, within or between cells [goid 5215] [evidence IEA]; The selective, often stoichiometric, interaction of a molecule with one or more specific sites on another molecule [goid 5488] [evidence IEA]	C330005L02Rik	C330005L02Rik
6380167	0.669555	7.24389	4.04304	0.00265648	0.0104427	-3.4366	Mus musculus	RefSeq	ILMN_190626	ILMN_261317	PPP1R14C	NM_133485.2	NM_133485.2	NA	76142	118130995	NM_133485.2	Ppp1r14c	NP_597844.1	ILMN_2632509	6380167	S	848	GACATTGATGATCTTCTTGATGCCAACAGCGAGGAGGAAAGAGCTTCGAA	10	-	6922970-6923019	10qA1	Mus musculus protein phosphatase 1, regulatory (inhibitor) subunit 14c (Ppp1r14c), mRNA.	Double layer of lipid molecules that encloses all cells, and, in eukaryotes, many organelles; may be a single or double lipid bilayer; also includes associated proteins [goid 16020] [evidence IEA]; That fraction of cells, prepared by disruptive biochemical methods, that includes the plasma and other membranes [goid 5624] [evidence ISO]; All of the contents of a cell excluding the plasma membrane …	The cascade of processes by which a signal interacts with a receptor, causing a change in the level or activity of a second messenger or other downstream target, and ultimately effecting a change in the functioning of the cell [goid 7165] [evidence TAS]; Any process that modulates the frequency, rate or extent of addition of phosphate groups into a molecule [goid 42325] [evidence IEA]	Stops, prevents or reduces the activity of a protein phosphatase, an enzyme that hydrolyzes phosphate groups from proteins [goid 4864] [evidence IEA]; [goid 4865] [evidence IDA]; Interacting selectively with any protein or protein complex (a complex of two or more proteins that may include other nonprotein molecules) [goid 5515] [evidence IEA]	KEPI; 6330514J04Rik	KEPI; 6330514J04Rik
5270138	-0.841586	5.14538	-4.03399	0.00269394	0.0105802	-3.45137	Mus musculus	RefSeq	ILMN_218664	ILMN_218664	HERC4	NM_026101.2	NM_026101.2	NA	67345	32451487	NM_026101.2	Herc4	NP_080377.2	ILMN_2722469	5270138	S	1643	GTACCAGATTTTCAGGGGTTGATATGAACGCTGCTAGACTCTTATTCCAC	10	+	62750669-62750718	10qB4	Mus musculus hect domain and RLD 4 (Herc4), mRNA.	All of the contents of a cell excluding the plasma membrane and nucleus, but including other subcellular structures [goid 5737] [evidence IEA]; The living contents of a cell; the matter contained within (but not including) the plasma membrane, usually taken to exclude large vacuoles and masses of secretory or ingested material. In eukaryotes it includes the nucleus and cytoplasm [goid 5622] [evid…	The chemical reactions and pathways resulting in the breakdown of a protein or peptide by hydrolysis of its peptide bonds, initiated by the covalent attachment of a ubiquitin moiety, or multiple ubiquitin moieties, to the protein [goid 6511] [evidence IEA]; The covalent alteration of one or more amino acids occurring in proteins, peptides and nascent polypeptides (co-translational, post-translati…	Catalysis of the ligation of two substances with concomitant breaking of a diphosphate linkage, usually in a nucleoside triphosphate. Ligase is the systematic name for any enzyme of EC class 6 [goid 16874] [evidence IEA]; Catalysis of the ligation of an acid to an amino acid via a carbon-nitrogen bond with concomitant breakage of a diphosphate linkage, usually in a nucleoside triphosphate [goid 1…	9530080M15Rik; 1700056O17Rik; mKIAA1593; 4921531D01Rik	9530080M15Rik; 1700056O17Rik; mKIAA1593; 4921531D01Rik
5870110	1.36776	4.46215	4.03387	0.00269447	0.0105806	-3.45158	Mus musculus	RefSeq	ILMN_211507	ILMN_211507	CROCC	NM_172122.1	NM_172122.1	NA	230872	26006472	NM_172122.1	Crocc	NP_742120.1	ILMN_2616522	5870110	S	6242	TGCTACAACCTGTACTACCCCGGGCCTCTCCTGGAAGAGCCTCTTGATGG	4	-	140572781-140572830	4qD3	Mus musculus ciliary rootlet coiled-coil, rootletin (Crocc), mRNA.	A cellular organelle, found close to the nucleus in many eukaryotic cells, consisting of a small cylinder with microtubular walls, 300-500 nm long and 150-250 nm in diameter. It contains nine short, parallel, peripheral microtubular fibrils, each fibril consisting of one complete microtubule fused to two incomplete microtubules. Cells usually have two centrioles, lying at right angles to each oth…	A process that is carried out at the cellular level which results in the formation, arrangement of constituent parts, or disassembly of a prolongation or process extending from a cell, e.g. a flagellum or axon [goid 30030] [evidence IEA]; The progression of biochemical and morphological phases and events that occur in a cell during successive cell replication or nuclear replication events. Canoni…	The action of a molecule that contributes to the structural integrity of a complex or assembly within or outside a cell [goid 5198] [evidence IDA]; Interacting selectively and stoichiometrically with kinesin, a cytoplasmic protein responsible for moving vesicles and organelles towards the distal end of microtubules [goid 19894] [evidence IPI]	KIAA0445	KIAA0445
1500382	0.827652	6.7835	4.0322	0.00270143	0.0106048	-3.45431	Mus musculus	RefSeq	ILMN_209773	ILMN_258169	SPAG9	NM_001025429.1	NM_001025429.1	NA	70834	70887775	NM_001025429.1	Spag9	NP_001020600.1	ILMN_1229777	1500382	S	1225	GGCCCGAGTTCTCATGGAGAGAAACCAGTACAAAGAGAGGCTGATGGAGC	11	+	93947608-93947657	11qD	Mus musculus sperm associated antigen 9 (Spag9), transcript variant 3, mRNA.	All of the contents of a cell excluding the plasma membrane and nucleus, but including other subcellular structures [goid 5737] [evidence IDA]	The initiation of the activity of the inactive enzyme MAP kinase by phosphorylation by a MAPKK [goid 187] [evidence IDA]; The process of creating protein oligomers, compounds composed of a small number, usually between three and ten, of identical component monomers. Oligomers may be formed by the polymerization of a number of monomers or the depolymerization of a large protein polymer [goid 51260…	Interacting selectively and stoichiometrically with kinesin, a cytoplasmic protein responsible for moving vesicles and organelles towards the distal end of microtubules [goid 19894] [evidence IDA]; Interacting selectively with JUN kinase, an enzyme that catalyzes the phosphorylation and activation of members of the JUN family [goid 8432] [evidence IDA]	Jip4; syd1; JSAP2; 3110018C07Rik; 4831406C20Rik; JLP; 4733401I23Rik; AW552012; Mapk8ip4; JSAP2a	Jip4; syd1; JSAP2; 3110018C07Rik; 4831406C20Rik; JLP; 4733401I23Rik; AW552012; Mapk8ip4; JSAP2a
2510605	0.196259	13.6731	4.03118	0.00270572	0.01062	-3.45598	Mus musculus	RefSeq	ILMN_208984	ILMN_208984	NDUFC1	NM_025523.1	NM_025523.1	NA	66377	13384945	NM_025523.1	Ndufc1	NP_079799.1	ILMN_1229975	2510605	S	55	TTCGCGGCTGCTGGCCCCCGCCCGGCTGCCGAGCTGCTCTTCAACACGGT	3	-	51212158-51212170:51212786-51212822	3qC	Mus musculus NADH dehydrogenase (ubiquinone) 1, subcomplex unknown, 1 (Ndufc1), mRNA.	A semiautonomous, self replicating organelle that occurs in varying numbers, shapes, and sizes in the cytoplasm of virtually all eukaryotic cells. It is notably the site of tissue respiration [goid 5739] [evidence IDA]; Penetrating at least one phospholipid bilayer of a membrane. May also refer to the state of being buried in the bilayer with no exposure outside the bilayer. When used to describe…	The directed movement of substances (such as macromolecules, small molecules, ions) into, out of, within or between cells, or within a multicellular organism [goid 6810] [evidence IEA]; A process whereby a series of electron carriers operate together to transfer electrons from donors to any of several different terminal electron acceptors to generate a transmembrane electrochemical gradient [goid…		2310016K22Rik; KFYI; MGC106656	2310016K22Rik; KFYI; MGC106656
610315	-0.707325	5.41266	-4.02495	0.00273195	0.0107131	-3.46616	Mus musculus	RefSeq	ILMN_209512	ILMN_209512	LDOC1L	NM_177630.3	NM_177630.3	NA	223732	110681692	NM_177630.3	Ldoc1l	NP_808298.2	ILMN_2596499	610315	S	4290	CGATCCTAGCTCACCGTGAGTCGTTTCACACCAAGTGACTGCATTTCCTC	15	-	84383914-84383963	15qE2	Mus musculus leucine zipper, down-regulated in cancer 1-like (Ldoc1l), mRNA.				Mart6; Mar6; BC058638; MGC73499	Mart6; Mar6; BC058638; MGC73499
6110193	0.665759	5.9369	4.01815	0.00276091	0.0108118	-3.47729	Mus musculus	RefSeq	ILMN_215039	ILMN_215039	CHD4	NM_145979.2	NM_145979.2	NA	107932	118130239	NM_145979.2	Chd4	NP_666091.1	ILMN_2654822	6110193	S	654	GTTCTCAGAGGAGGATTATCGGACCCTCACCAACTACAAGGCCTTCAGCC	6	+	125051295-125051344	6qF2	Mus musculus chromodomain helicase DNA binding protein 4 (Chd4), mRNA.	A membrane-bounded organelle of eukaryotic cells in which chromosomes are housed and replicated. In most cells, the nucleus contains all of the cell's chromosomes except the organellar chromosomes, and is the site of RNA synthesis and processing. In some species, or in specialized cell types, RNA metabolism or DNA replication may be absent [goid 5634] [evidence IEA]; The ordered and organized com…	Any process that modulates the frequency, rate or extent of DNA-dependent transcription [goid 6355] [evidence IEA]; The synthesis of either RNA on a template of DNA or DNA on a template of RNA [goid 6350] [evidence IEA]; The alteration of DNA or protein in chromatin, which may result in changing the chromatin structure [goid 16568] [evidence IEA]; The formation or destruction of chromatin structu…	Catalysis of the hydrolysis of various bonds, e.g. C-O, C-N, C-C, phosphoric anhydride bonds, etc. Hydrolase is the systematic name for any enzyme of EC class 3 [goid 16787] [evidence IEA]; Interacting selectively with any metal ion [goid 46872] [evidence IEA]; Catalysis of the reaction: NTP + H2O = NDP + phosphate to drive the unwinding of a DNA or RNA helix [goid 4386] [evidence IEA]; Interacti…	9530019N15Rik; BC005710; KIAA4075; D6Ertd380e; mKIAA4075; MGC11769; AA617397	9530019N15Rik; BC005710; KIAA4075; D6Ertd380e; mKIAA4075; MGC11769; AA617397
7510711	-1.18324	4.69016	-4.01307	0.00278274	0.0108907	-3.4856	Mus musculus	RefSeq	ILMN_187022	ILMN_226297	ARNT	NM_009709.3	NM_009709.3	NA	11863	142379121	NM_009709.3	Arnt	NP_033839.2	ILMN_2728802	7510711	S	2281	CCAGTGAGCAGCATGTTCAGCAGACACAAGCACAAGCACCTAGCCAGCCT	3	+	95298474-95298523	3qF2.1	Mus musculus aryl hydrocarbon receptor nuclear translocator (Arnt), transcript variant 2, mRNA.	All of the contents of a cell excluding the plasma membrane and nucleus, but including other subcellular structures [goid 5737] [evidence IDA]; A membrane-bounded organelle of eukaryotic cells in which chromosomes are housed and replicated. In most cells, the nucleus contains all of the cell's chromosomes except the organellar chromosomes, and is the site of RNA synthesis and processing. In some …	The process whereby relatively unspecialized cells, e.g. embryonic or regenerative cells, acquire specialized structural and/or functional features that characterize the cells, tissues, or organs of the mature organism or some other relatively stable phase of the organism's life history. Differentiation includes the processes involved in commitment of a cell to a specific fate [goid 30154] [evide…	Plays a role in regulating transcription; may bind a promoter or enhancer DNA sequence or interact with a DNA-binding transcription factor [goid 30528] [evidence IEA]; Mediates the transfer of a signal from the outside to the inside of a cell by means other than the introduction of the signal molecule itself into the cell [goid 4871] [evidence IEA]; The function of binding to a specific DNA seque…	W08714; mKIAA4051; Hif1b; ESTM42; Drnt; D3Ertd557e; KIAA4051	W08714; mKIAA4051; Hif1b; ESTM42; Drnt; D3Ertd557e; KIAA4051
7650484	1.45958	4.55532	4.01075	0.00279277	0.0109266	-3.48939	Mus musculus	RefSeq	ILMN_209160	ILMN_209160	TMCC2	NM_178874.2	NM_178874.2	NA	68875	31341188	NM_178874.2	Tmcc2	NP_849205.1	ILMN_2593104	7650484	S	3035	CCAGGACTTATTCTTGGTTCATCATACTCCAGACCATGTATCCTCTGGTG	1	-	134253217-134253266	1qE4	Mus musculus transmembrane and coiled-coil domains 2 (Tmcc2), mRNA.	Penetrating at least one phospholipid bilayer of a membrane. May also refer to the state of being buried in the bilayer with no exposure outside the bilayer. When used to describe a protein, indicates that all or part of the peptide sequence is embedded in the membrane [goid 16021] [evidence IEA]; Double layer of lipid molecules that encloses all cells, and, in eukaryotes, many organelles; may be…			1110063G11Rik; KIAA0481	1110063G11Rik; KIAA0481
2630750	-0.304021	7.32749	-4.00702	0.00280899	0.0109834	-3.4955	Mus musculus	RefSeq	ILMN_218166	ILMN_218166	RANBP2	NM_011240.3	NM_011240.3	NA	19386	153792533	NM_011240.3	Ranbp2	NP_035370.2	ILMN_2692496	2630750	S	9162	GACTTTAAGCATGTAGTATTTGGGTTTGTTAAGGATGGCATGGATACTGT				10qB4	Mus musculus RAN binding protein 2 (Ranbp2), mRNA.	Any of the numerous similar discrete openings in the nuclear envelope of a eukaryotic cell, where the inner and outer nuclear membranes are joined [goid 5643] [evidence IEA]; A membrane-bounded organelle of eukaryotic cells in which chromosomes are housed and replicated. In most cells, the nucleus contains all of the cell's chromosomes except the organellar chromosomes, and is the site of RNA syn…	The process of assisting in the covalent and noncovalent assembly of single chain polypeptides or multisubunit complexes into the correct tertiary structure [goid 6457] [evidence IEA]; The directed movement of proteins in a cell, from one side of a membrane to another [goid 65002] [evidence IEA]; The chemical reactions and pathways resulting in the breakdown of a protein or peptide by hydrolysis …	Interacting selectively with any metal ion [goid 46872] [evidence IEA]; Interacting selectively with any protein or protein complex (a complex of two or more proteins that may include other nonprotein molecules) [goid 5515] [evidence IPI]; Catalysis of the geometric or structural changes within one molecule. Isomerase is the systematic name for any enzyme of EC class 5 [goid 16853] [evidence IEA]…	NUP358; AI256741; A430087B05Rik	NUP358; AI256741; A430087B05Rik
620280	-0.519181	8.08623	-4.00493	0.00281811	0.011014	-3.49892	Mus musculus	RefSeq	ILMN_213787	ILMN_213787	SGK3	NM_177547.3	NM_177547.3	NA	170755	83649752	NM_177547.3	Sgk3	NP_808215.2	ILMN_1214762	620280	S	1667	GGAGGCAGATGATGCATTTGTTGGTTTTTCTTACGCCCCTCCTTCGGAAG	1	+	9888908-9888957	1qA2	Mus musculus serum/glucocorticoid regulated kinase 3 (Sgk3), transcript variant 2, mRNA.	A vesicle formed of membrane or protein, found in the cytoplasm of a cell [goid 31410] [evidence IEA]; A membrane-bounded organelle that carries materials newly ingested by endocytosis. It passes many of the materials to lysosomes for degradation [goid 5768] [evidence IEA]; A membrane-bounded vesicle found in the cytoplasm of the cell [goid 16023] [evidence IDA]	A process which directly inhibits any of the steps required for cell death by apoptosis [goid 6916] [evidence IDA]; The process of introducing a phosphate group on to a protein [goid 6468] [evidence IEA]; Any process that mediates interactions between a cell and its surroundings. Encompasses interactions such as signaling or attachment between one cell and another cell, between a cell and an extr…	Interacting selectively with ATP, adenosine 5'-triphosphate, a universally important coenzyme and enzyme regulator [goid 5524] [evidence IEA]; Catalysis of the reaction: ATP + a protein serine/threonine = ADP + protein serine/threonine phosphate [goid 4674] [evidence IDA]; Interacting selectively with any inositol-containing glycerophospholipid [goid 35091] [evidence IEA]; Interacting selectively…	A330005P07Rik; 2510015P22Rik; Cisk	A330005P07Rik; 2510015P22Rik; Cisk
1500678	-1.39818	4.83808	-4.00442	0.00282033	0.011021	-3.49975	Mus musculus	RefSeq	ILMN_184877	ILMN_237434	USP13	NM_001013024.2	NM_001013024.2	NA	72607	118131141	NM_001013024.2	Usp13	NP_001013042.1	ILMN_2422325	1500678	S	4473	GGAAATTCCTACACTAAGCAGCCTTACAAAACTCAGTCCCTAAGGGCCAC	3	+	32833966-32834015	3qA3	Mus musculus ubiquitin specific peptidase 13 (isopeptidase T-3) (Usp13), mRNA.		The chemical reactions and pathways resulting in the breakdown of a protein or peptide by hydrolysis of its peptide bonds, initiated by the covalent attachment of a ubiquitin moiety, or multiple ubiquitin moieties, to the protein [goid 6511] [evidence IEA]	Catalysis of the hydrolysis of various bonds, e.g. C-O, C-N, C-C, phosphoric anhydride bonds, etc. Hydrolase is the systematic name for any enzyme of EC class 3 [goid 16787] [evidence IEA]; Catalysis of the hydrolysis of a peptide bond. A peptide bond is a covalent bond formed when the carbon atom from the carboxyl group of one amino acid shares electrons with the nitrogen atom from the amino gro…	2700071E21Rik; IsoT-3; MGC107670; ISOT3; AI848077	ISOT3; 2700071E21Rik; IsoT-3; MGC107670; AI848077
670014	0.223489	10.4017	4.00265	0.00282811	0.011048	-3.50266	Mus musculus	RefSeq	ILMN_223601	ILMN_223601	TRAPPC2L	NM_021502.1	NM_021502.1	NA	59005	10946913	NM_021502.1	Trappc2l	NP_067477.1	ILMN_2766315	670014	S	448	AGTGGGGACCTCTGCCTGCCTCAGTCGTTCAGAAGAGAAGCCTGCGTTCA	8	+	125139355-125139404	8qE1	Mus musculus trafficking protein particle complex 2-like (Trappc2l), mRNA.	The living contents of a cell; the matter contained within (but not including) the plasma membrane, usually taken to exclude large vacuoles and masses of secretory or ingested material. In eukaryotes it includes the nucleus and cytoplasm [goid 5622] [evidence IEA]	The directed movement of substances from the endoplasmic reticulum (ER) to the Golgi, mediated by COP II vesicles. Small COP II coated vesicles form from the ER and then fuse directly with the cis-Golgi. Larger structures are transported along microtubules to the cis-Golgi [goid 6888] [evidence IEA]		Hspc176; 1810017G16Rik; AB030200	Hspc176; 1810017G16Rik; AB030200
1260719	-0.6436	5.96049	-3.97467	0.00295384	0.0114851	-3.54852	Mus musculus	RefSeq	ILMN_215014	ILMN_215014	KIFAP3	NM_010629.2	NM_010629.2	NA	16579	133893224	NM_010629.2	Kifap3	NP_034759.1	ILMN_1222022	1260719	S	2378	CCTCTGAAGGAGCCATAAGTCCAGACTTCTTCAATGATTTTCACCTCCAG	1	+	165818349-165818398	1qH2.2	Mus musculus kinesin-associated protein 3 (Kifap3), mRNA.	Any complex that includes a dimer of molecules from the kinesin superfamily, a group of related proteins that contain an extended region of predicted alpha-helical coiled coil in the main chain that likely produces dimerization. The native complexes of several kinesin family members have also been shown to contain additional peptides, often designated light chains as all of the noncatalytic subun…	Any process that stops, prevents or reduces the rate or extent of cell proliferation [goid 8285] [evidence IMP]; Any process by which a protein is transported to, or maintained in, a specific location [goid 8104] [evidence IMP]; A series of molecular signals within the cell that are mediated by a member of the Rho family of proteins switching to a GTP-bound active state [goid 7266] [evidence TAS]…	Interacting selectively and stoichiometrically with kinesin, a cytoplasmic protein responsible for moving vesicles and organelles towards the distal end of microtubules [goid 19894] [evidence IEA]; The selective, often stoichiometric, interaction of a molecule with one or more specific sites on another molecule [goid 5488] [evidence IEA]; Interacting selectively with any protein or protein comple…	SMAP; KAP3	SMAP; KAP3
6650687	-0.66775	6.66533	-3.97007	0.00297509	0.0115589	-3.55608	Mus musculus	RefSeq	ILMN_192279	ILMN_252003	RUNX1	NM_009821.1	NM_009821.1	NA	12394	6753297	NM_009821.1	Runx1	NP_033951.1	ILMN_2589107	6650687	S	4154	CCATGGCTACGGTTCAGATGTGCATCGTGTCACTGTAAATGTAATGGTAC	16	-	92604435-92604484	16qC4	Mus musculus runt related transcription factor 1 (Runx1), mRNA.	A membrane-bounded organelle of eukaryotic cells in which chromosomes are housed and replicated. In most cells, the nucleus contains all of the cell's chromosomes except the organellar chromosomes, and is the site of RNA synthesis and processing. In some species, or in specialized cell types, RNA metabolism or DNA replication may be absent [goid 5634] [evidence IEA]	Any process that activates or increases angiogenesis [goid 45766] [evidence IMP]; The process whereby a relatively unspecialized cell acquires specialized features of a neuron [goid 30182] [evidence IMP]; The process whose specific outcome is the progression of the skeleton over time, from its formation to the mature structure. The skeleton is the bony framework of the body in vertebrates (endosk…	Interacting selectively with ATP, adenosine 5'-triphosphate, a universally important coenzyme and enzyme regulator [goid 5524] [evidence IEA]; Interacting selectively with any protein or protein complex (a complex of two or more proteins that may include other nonprotein molecules) [goid 5515] [evidence IPI]; The function of binding to a specific DNA sequence in order to modulate transcription. T…	Pebpa2b; AI462102; Pebp2a2; Cbfa2; AML1	Pebpa2b; AI462102; Pebp2a2; Cbfa2; AML1
6020315	0.62378	3.52985	3.96639	0.00299219	0.0116096	-3.56212	Mus musculus	RefSeq	ILMN_185261	ILMN_260027	UBE4A	NM_145400.2	NM_145400.2	NA	140630	34147054	NM_145400.2	Ube4a	NP_663375.2	ILMN_2468276	6020315	S	3226	GGTCTTGTGTGAAAATAGTGGGGGAAGGCAGGCTCATTTCTAGCTGATAG	9	-	44741264-44741313	9qA5.2	Mus musculus ubiquitination factor E4A, UFD2 homolog (S. cerevisiae) (Ube4a), mRNA.	All of the contents of a cell excluding the plasma membrane and nucleus, but including other subcellular structures [goid 5737] [evidence IDA]	Addition of multiple ubiquitin moieties to a protein, forming a ubiquitin chain [goid 209] [evidence IDA]; The chemical reactions and pathways resulting in the breakdown of a protein or peptide by hydrolysis of its peptide bonds, initiated by the covalent attachment of a ubiquitin moiety, or multiple ubiquitin moieties, to the protein [goid 6511] [evidence IEA]	Catalysis of the reaction: Catalysis of the reaction: ATP + ubiquitin + protein N-ubiquityl(n)lysine = AMP + diphosphate + protein N-ubiquityl(n+1)lysine, i.e. the ligation of ubiquitin moieties, via isopeptide bonds, to extend the length of the multiubiquitin chain attached to a substrate protein [goid 34450] [evidence IDA]; Catalysis of the reaction: ATP + ubiquitin + protein lysine = AMP + dip…	9930123J21Rik; UFD2b; 4732444G18Rik	9930123J21Rik; UFD2b; 4732444G18Rik
2140736	-0.606122	8.07079	-3.96051	0.00301972	0.0117093	-3.57177	Mus musculus	RefSeq	ILMN_213819	ILMN_213819	TMEM131	NM_018872.2	NM_018872.2	NA	56030	119372305	NM_018872.2	Tmem131	NP_061360.2	ILMN_2641124	2140736	S	5550	AGCGGCTTGTGGTCCACCACTCCATTCAGCAGCTCCATCTGGTCCAGCAA	1	-	36849982-36850031	1qB	Mus musculus transmembrane protein 131 (Tmem131), mRNA.	Penetrating at least one phospholipid bilayer of a membrane. May also refer to the state of being buried in the bilayer with no exposure outside the bilayer. When used to describe a protein, indicates that all or part of the peptide sequence is embedded in the membrane [goid 16021] [evidence IEA]; Double layer of lipid molecules that encloses all cells, and, in eukaryotes, many organelles; may be…			YR-23; CC28; mKIAA0257; Neg; RW1; 2610524E03Rik; D1Bwg0491e	YR-23; CC28; mKIAA0257; Neg; RW1; 2610524E03Rik; D1Bwg0491e
2570725	0.207679	10.424	3.95431	0.00304903	0.0118176	-3.58195	Mus musculus	RefSeq	ILMN_213876	ILMN_213876	CDC2L1	NM_007661.3	NM_007661.3	NA	12537	142350164	NM_007661.3	Cdc2l1	NP_031687.2	ILMN_2641705	2570725	S	2077	CCTTCAGCGAGTATCCCTATAACAACCTCCGCAAGAGATTTGGGGCTTTG	4	+	155023188-155023237	4qE2	Mus musculus cell division cycle 2-like 1 (Cdc2l1), mRNA.	A membrane-bounded organelle of eukaryotic cells in which chromosomes are housed and replicated. In most cells, the nucleus contains all of the cell's chromosomes except the organellar chromosomes, and is the site of RNA synthesis and processing. In some species, or in specialized cell types, RNA metabolism or DNA replication may be absent [goid 5634] [evidence IDA]	The process resulting in the physical partitioning and separation of a cell into daughter cells [goid 51301] [evidence IEA]; The process whose specific outcome is the progression of the blastocyst over time, from its formation to the mature structure. The mammalian blastocyst is a hollow ball of cells containing two cell types, the inner cell mass and the trophectoderm [goid 1824] [evidence IMP];…	Catalysis of the transfer of a phosphate group, usually from ATP, to a substrate molecule [goid 16301] [evidence IEA]; Interacting selectively with a nucleotide, any compound consisting of a nucleoside that is esterified with (ortho)phosphate or an oligophosphate at any hydroxyl group on the ribose or deoxyribose moiety [goid 166] [evidence IEA]; Catalysis of the reaction: ATP + a protein serine/…	Cdc2l2; CDK11-p110; CDK11-p58; p58; CDK11-p46; AA989746	Cdc2l2; CDK11-p46; CDK11-p110; CDK11-p58; p58; AA989746
5050112	-0.589697	5.99181	-3.93211	0.00315655	0.0121818	-3.61845	Mus musculus	RefSeq	ILMN_219477	ILMN_219477	GEMIN7	NM_027189.2	NM_027189.2	NA	69731	141801804	NM_027189.2	Gemin7	NP_081465.1	ILMN_1249986	5050112	S	190	AGAGTCACAGGAACAGCGGGCCCGAGCCACTCTGCGAGAGCGCTACCTCC	7	-	20150821-20150870	7qA3	Mus musculus gem (nuclear organelle) associated protein 7 (Gemin7), mRNA.	All of the contents of a cell excluding the plasma membrane and nucleus, but including other subcellular structures [goid 5737] [evidence IEA]; A membrane-bounded organelle of eukaryotic cells in which chromosomes are housed and replicated. In most cells, the nucleus contains all of the cell's chromosomes except the organellar chromosomes, and is the site of RNA synthesis and processing. In some …	The process of removing sections of the primary RNA transcript to remove sequences not present in the mature form of the RNA and joining the remaining sections to form the mature form of the RNA [goid 8380] [evidence IEA]; Any process involved in the conversion of a primary mRNA transcript into one or more mature mRNA(s) prior to translation into polypeptide [goid 6397] [evidence IEA]	Interacting selectively with any protein or protein complex (a complex of two or more proteins that may include other nonprotein molecules) [goid 5515] [evidence IPI]	AI461688; AI120175; 2400008I04Rik	AI461688; AI120175; 2400008I04Rik
4860088	0.440448	9.31619	3.91644	0.00323478	0.0124699	-3.64423	Mus musculus	RefSeq	ILMN_216262	ILMN_216262	AKT1S1	NM_026270.3	NM_026270.3	NA	67605	146135063	NM_026270.3	Akt1s1	NP_080546.1	ILMN_1214358	4860088	S	1414	ACAGTACCAGCTTCCTGTCCCCCGACCCTAACAGGTGCCTTAAAAGGCCC				7qB4	Mus musculus AKT1 substrate 1 (proline-rich) (Akt1s1), mRNA.	All of the contents of a cell excluding the plasma membrane and nucleus, but including other subcellular structures [goid 5737] [evidence IEA]; Any constituent part of cytosol, that part of the cytoplasm that does not contain membranous or particulate subcellular components [goid 44445] [evidence IDA]; The part of a cell or its extracellular environment in which a gene product is located. A gene …	Any process that modulates the frequency, rate or extent of survival gene product expression; survival gene products are those that antagonize the apoptotic program. Regulation can be at the transcriptional, translational, or posttranslational level [goid 45884] [evidence IDA]; Any process that modulates the occurrence or rate of cell death by apoptosis in the nervous system. It may stop or preve…	Elemental activities, such as catalysis or binding, describing the actions of a gene product at the molecular level. A given gene product may exhibit one or more molecular functions [goid 3674] [evidence ND ]	Lobel; PRAS40; AI227026; Lobe; 1110012J22Rik	Lobel; PRAS40; AI227026; Lobe; 1110012J22Rik
5570348	0.645636	8.2101	3.90738	0.00328099	0.0126366	-3.65917	Mus musculus	RefSeq	ILMN_210984	ILMN_210984	4121402D02RIK	NM_028722.1	NM_028722.1	NA	74026	21311987	NM_028722.1	4121402D02Rik	NP_082998.1	ILMN_1244356	5570348	S	2931	GGATTCCTTAGTGGGGCTTGATCCTATTAGCCAAACTTTTGGTGGTGAGG	11	+	98667511-98667560	11qD	Mus musculus RIKEN cDNA 4121402D02 gene (4121402D02Rik), mRNA.	A membrane-bounded organelle of eukaryotic cells in which chromosomes are housed and replicated. In most cells, the nucleus contains all of the cell's chromosomes except the organellar chromosomes, and is the site of RNA synthesis and processing. In some species, or in specialized cell types, RNA metabolism or DNA replication may be absent [goid 5634] [evidence IEA]	The alteration of DNA or protein in chromatin, which may result in changing the chromatin structure [goid 16568] [evidence IEA]		Msl-1; AA682082; 4930463F05Rik; 2810017F12Rik	Msl-1; AA682082; 4930463F05Rik; 2810017F12Rik
1240706	-0.83838	6.97526	-3.89816	0.00332871	0.0127955	-3.67436	Mus musculus	RefSeq	ILMN_223647	ILMN_223647	3110082I17RIK	NM_028469.3	NM_028469.3	NA	73212	146134370	NM_028469.3	3110082I17Rik	NP_082745.2	ILMN_2767057	1240706	S	988	GGTGGGGGACTCCTACATATTCGATCTGGGTGCCATTGCAGTGCAGCCTG				5qG2	Mus musculus RIKEN cDNA 3110082I17 gene (3110082I17Rik), mRNA.				AW411904	AW411904
2760669	-0.794463	3.73249	-3.87528	0.00345028	0.0132252	-3.7121	Mus musculus	RefSeq	ILMN_218446	ILMN_218446	SPRR2F	NM_011472.2	NM_011472.2	NA	20760	49169822	NM_011472.2	Sprr2f	NP_035602.1	ILMN_2695944	2760669	S	516	CCATTGTTCAGTATGACATTTTTCAAATCTCTCTGTCACTTGAGCAGGGT	3	+	92170271-92170320	3qF1	Mus musculus small proline-rich protein 2F (Sprr2f), mRNA.	All of the contents of a cell excluding the plasma membrane and nucleus, but including other subcellular structures [goid 5737] [evidence IEA]; An insoluble protein structure formed under the plasma membrane of cornifying epithelial cells [goid 1533] [evidence NAS]	The process in which the cytoplasm of the outermost cells of the vertebrate epidermis is replaced by keratin. Keratinization occurs in the stratum corneum, feathers, hair, claws, nails, hooves, and horns [goid 31424] [evidence IEA]; The process whose specific outcome is the progression of the epidermis over time, from its formation to the mature structure. The epidermis is the outer epithelial la…	The action of a molecule that contributes to the structural integrity of a complex or assembly within or outside a cell [goid 5198] [evidence IEA]
6180092	0.237963	12.2854	3.87473	0.00345328	0.0132347	-3.71301	Mus musculus	RefSeq	ILMN_216250	ILMN_309967	1500032D16RIK	NM_001083891.1	NM_001083891.1	NA	78330	140969945	NM_001083891.1	1500032D16Rik	NP_001077360.1	ILMN_2668977	6180092	S	363	CAAATTCAGGCTGCCACAGCCGTCTTCAGGACGAGAGTCACCTCGGCACT	17	+	31668146-31668195	17qB1	Mus musculus RIKEN cDNA 1500032D16 gene (1500032D16Rik), transcript variant 2, mRNA.
580670	-1.79565	5.38048	-3.86889	0.00348508	0.0133427	-3.72266	Mus musculus	RefSeq	ILMN_213406	ILMN_213406	ASNS	NM_012055.3	NM_012055.3	NA	27053	146134364	NM_012055.3	Asns	NP_036185.1	ILMN_2636755	580670	S	277	GCCGATAAGAGTGAGGAAATACCCTTATTTGTGGCTCTGTTACAATGGTG				6qA1	Mus musculus asparagine synthetase (Asns), mRNA.	The part of a cell or its extracellular environment in which a gene product is located. A gene product may be located in one or more parts of a cell and its location may be as specific as a particular macromolecular complex, that is, a stable, persistent association of macromolecules that function together [goid 5575] [evidence ND ]	The chemical reactions and pathways resulting in the formation of amino acids, organic acids containing one or more amino substituents [goid 8652] [evidence IEA]; The chemical reactions and pathways resulting in the formation of asparagine, 2-amino-3-carbamoylpropanoic acid [goid 6529] [evidence ISO]; The chemical reactions and pathways involving glutamine, 2-amino-4-carbamoylbutanoic acid [goid …	Catalysis of the ligation of two substances with concomitant breaking of a diphosphate linkage, usually in a nucleoside triphosphate. Ligase is the systematic name for any enzyme of EC class 6 [goid 16874] [evidence IEA]; Catalysis of the reaction: ATP + L-aspartate + L-glutamine = AMP + diphosphate + L-asparagine + L-glutamate [goid 4066] [evidence ISO]
7570528	1.01138	6.86568	3.85866	0.00354156	0.0135448	-3.73956	Mus musculus	RefSeq	ILMN_208631	ILMN_208631	GLUL	NM_008131.3	NM_008131.3	NA	14645	118130944	NM_008131.3	Glul	NP_032157.2	ILMN_2644496	7570528	S	2694	GCCAGGCAGCGCTTATAAATCAACCTAACATTTATAAGATTTCCTCTGAC	1	+	155756756-155756805	1qG3	Mus musculus glutamate-ammonia ligase (glutamine synthetase) (Glul), mRNA.	A semiautonomous, self replicating organelle that occurs in varying numbers, shapes, and sizes in the cytoplasm of virtually all eukaryotic cells. It is notably the site of tissue respiration [goid 5739] [evidence IDA]; All of the contents of a cell excluding the plasma membrane and nucleus, but including other subcellular structures [goid 5737] [evidence IEA]; The living contents of a cell; the …	The chemical reactions and pathways involving various organic and inorganic nitrogenous compounds; includes nitrogen fixation, nitrification, denitrification, assimilatory/dissimilatory nitrate reduction and the interconversion of nitrogenous organic matter and ammonium [goid 6807] [evidence IEA]; The chemical reactions and pathways resulting in the formation of glutamine, 2-amino-4-carbamoylbuta…	Catalysis of the ligation of two substances with concomitant breaking of a diphosphate linkage, usually in a nucleoside triphosphate. Ligase is the systematic name for any enzyme of EC class 6 [goid 16874] [evidence IEA]; Catalysis of the reaction: ATP + L-glutamate + NH3 = ADP + phosphate + L-glutamine [goid 4356] [evidence IEA]; Catalysis of a biochemical reaction at physiological temperatures.…	GS; Glns	GS; Glns
4570360	-1.17006	5.7113	-3.85636	0.00355436	0.0135877	-3.74335	Mus musculus	RefSeq	ILMN_209256	ILMN_209256	2210417D09RIK	NM_025620.2	NM_025620.2	NA	66532	70909367	NM_025620.2	2210417D09Rik	NP_079896.1	ILMN_2594066	4570360	S	780	GGGCTGAGTGACATGGGCAGAGTTTACATCCGCATCCTCTAAACTGGGCA	6	+	146981838-146981879:146981880-146981887	6qG3	Mus musculus RIKEN cDNA 2210417D09 gene (2210417D09Rik), mRNA.	Double layer of lipid molecules that encloses all cells, and, in eukaryotes, many organelles; may be a single or double lipid bilayer; also includes associated proteins [goid 16020] [evidence IEA]; A membrane-bounded organelle that carries materials newly ingested by endocytosis. It passes many of the materials to lysosomes for degradation [goid 5768] [evidence IEA]
3520500	-0.900629	3.95812	-3.84839	0.00359922	0.0137489	-3.75654	Mus musculus	RefSeq	ILMN_209599	ILMN_209599	1700123O20RIK	NM_021437.1	NM_021437.1	NA	58248	10946805	NM_021437.1	1700123O20Rik	NP_067412.1	ILMN_2597332	3520500	S	1267	GAGGTCAGTGAGCCAGATTTCGTGGCGAAGTTTTACCAAGCAGTGGCTGC	14	+	55309002-55309051	14qC3	Mus musculus RIKEN cDNA 1700123O20 gene (1700123O20Rik), mRNA.				MNCb-2990	MNCb-2990
3870164	-1.59628	4.90799	-3.84546	0.00361582	0.0138001	-3.76137	Mus musculus	RefSeq	ILMN_219941	ILMN_219941	IRGQ	NM_153134.2	NM_153134.2	NA	210146	34328371	NM_153134.2	Irgq	NP_694774.2	ILMN_1220700	3870164	S	2103	CAGTCACCCGATTTCCTAGGTACTGAATGGGAGTAGGGTCTATGCGCCAG	7	+	25319639-25319688	7qA3	Mus musculus immunity-related GTPase family, Q (Irgq), mRNA.	The part of a cell or its extracellular environment in which a gene product is located. A gene product may be located in one or more parts of a cell and its location may be as specific as a particular macromolecular complex, that is, a stable, persistent association of macromolecules that function together [goid 5575] [evidence ND ]	Any process specifically pertinent to the functioning of integrated living units: cells, tissues, organs, and organisms. A process is a collection of molecular events with a defined beginning and end [goid 8150] [evidence ND ]	Elemental activities, such as catalysis or binding, describing the actions of a gene product at the molecular level. A given gene product may exhibit one or more molecular functions [goid 3674] [evidence ND ]	FKSG27; AF322649; Irgq1	FKSG27; AF322649; Irgq1
4490315	0.416428	10.0646	3.83842	0.0036561	0.0139372	-3.77302	Mus musculus	RefSeq	ILMN_209872	ILMN_209872	EXOC4	NM_009148.3	NM_009148.3	NA	20336	118130512	NM_009148.3	Exoc4	NP_033174.2	ILMN_1222773	4490315	S	3018	GCTCCATCTACACTGAGGCTTAGTGGGTAGGCGGTGGATTATTTTCTCTT	6	+	33922238-33922287	6qA3.3	Mus musculus exocyst complex component 4 (Exoc4), mRNA.	A protein complex peripherally associated with the plasma membrane that determines where secretory vesicles dock and fuse. At least eight complex components are conserved between yeast and mammals [goid 145] [evidence IEA]	The directed movement of proteins into, out of, within or between cells [goid 15031] [evidence IEA]; A process of secretion by a cell that results in the release of intracellular molecules (e.g. hormones, matrix proteins) contained within a membrane-bounded vesicle by fusion of the vesicle with the plasma membrane of a cell. This is the process whereby most molecules are secreted from eukaryotic …	Interacting selectively with a PDZ domain of a protein, a domain found in diverse signaling proteins [goid 30165] [evidence IPI]	C78892; Sec8l1; Sec8	C78892; Sec8l1; Sec8
620075	-0.505486	8.40522	-3.83807	0.00365811	0.0139428	-3.77359	Mus musculus	RefSeq	ILMN_222361	ILMN_222361	CETN2	NM_019405.6	NM_019405.6	NA	26370	142368991	NM_019405.6	Cetn2	NP_062278.2	ILMN_1220409	620075	S	378	AGACTGGGAAAATATCATTCAAGAATCTTAAGCGCGTGGCCAAGGAGCTG	X	-	70160208-70160257	XqA7.3	Mus musculus centrin 2 (Cetn2), mRNA.	A 9+0 cilium that forms the portion of the axoneme traversing the boundary between the photoreceptor inner and outer segments [goid 32391] [evidence IDA]; A structure comprised of a core structure (in most organisms, a pair of centrioles) and peripheral material from which a microtubule-based structure, such as a spindle apparatus, is organized. Centrosomes occur close to the nucleus during inter…	Progression through mitosis, the division of the eukaryotic cell nucleus to produce two daughter nuclei that, usually, contain the identical chromosome complement to their mother [goid 7067] [evidence IEA]; The progression of biochemical and morphological phases and events that occur in a cell during successive cell replication or nuclear replication events. Canonically, the cell cycle comprises …	Interacting selectively with calcium ions (Ca2+) [goid 5509] [evidence TAS]; Interacting selectively with any protein or protein complex (a complex of two or more proteins that may include other nonprotein molecules) [goid 5515] [evidence ISO]; Interacting selectively with a complex of G-protein beta/gamma subunits [goid 31683] [evidence IDA]	1110034A02Rik; AI326150; caltractin; Calt	1110034A02Rik; AI326150; caltractin; Calt
4290195	0.300735	9.73976	3.83769	0.00366032	0.0139492	-3.77423	Mus musculus	RefSeq	ILMN_192699	ILMN_231446	SUPT4H1	NM_009296.1	NM_009296.1	NA	20922	6678180	NM_009296.1	Supt4h1	NP_033322.1	ILMN_1247505	4290195	S	424	CTGTACTTGTTTTCTTGTGGAACTAAACCGTGGGACCCCAAAGACTCCCC	11	+	87556850-87556899	11qC	Mus musculus suppressor of Ty 4 homolog 1 (S. cerevisiae) (Supt4h1), mRNA.	A membrane-bounded organelle of eukaryotic cells in which chromosomes are housed and replicated. In most cells, the nucleus contains all of the cell's chromosomes except the organellar chromosomes, and is the site of RNA synthesis and processing. In some species, or in specialized cell types, RNA metabolism or DNA replication may be absent [goid 5634] [evidence IEA]	Any process that modulates the frequency, rate or extent of DNA-dependent transcription [goid 6355] [evidence IEA]; The synthesis of either RNA on a template of DNA or DNA on a template of RNA [goid 6350] [evidence IEA]; Any process that activates or increases the frequency, rate or extent of transcription [goid 45941] [evidence IEA]	Interacting selectively with any metal ion [goid 46872] [evidence IEA]; Interacting selectively with zinc (Zn) ions [goid 8270] [evidence IEA]; Any activity that increases the rate of transcription elongation, the addition of ribonucleotides to an RNA molecule following transcription initiation [goid 8159] [evidence IEA]	AL022777; Supt4h	AL022777; Supt4h
6900491	-0.53817	8.33888	-3.83649	0.00366727	0.0139736	-3.77622	Mus musculus	RefSeq	ILMN_209126	ILMN_209126	KLHL9	NM_172871.2	NM_172871.2	NA	242521	124244067	NM_172871.2	Klhl9	NP_766459.2	ILMN_1246060	6900491	S	2728	GCCAAGGTACAGCTACCTCCCTCTTGGATAGTTTTGGACAATCTGTTGTC	4	-	88365635-88365684	4qC4	Mus musculus kelch-like 9 (Drosophila) (Klhl9), mRNA.		The chemical reactions and pathways resulting in the breakdown of a protein or peptide by hydrolysis of its peptide bonds, initiated by the covalent attachment of a ubiquitin moiety, or multiple ubiquitin moieties, to the protein [goid 6511] [evidence IEA]	Interacting selectively with any protein or protein complex (a complex of two or more proteins that may include other nonprotein molecules) [goid 5515] [evidence IEA]	mKIAA1354; C530050O22Rik; 8030469P05; KIAA1354	mKIAA1354; C530050O22Rik; 8030469P05; KIAA1354
6520577	-0.2631	10.2631	-3.81837	0.00377347	0.01434	-3.80621	Mus musculus	RefSeq	ILMN_213448	ILMN_213448	IRF2BP1	NM_178757.3	NM_178757.3	NA	272359	32129220	NM_178757.3	Irf2bp1	NP_848872.2	ILMN_1228568	6520577	S	2617	CCACTAGGTGGTGCCTTTTGTCCAGTGGGCTGCTGTTTGTAGTAGTGTAC	7	+	19592030-19592079	7qA3	Mus musculus interferon regulatory factor 2 binding protein 1 (Irf2bp1), mRNA.	A membrane-bounded organelle of eukaryotic cells in which chromosomes are housed and replicated. In most cells, the nucleus contains all of the cell's chromosomes except the organellar chromosomes, and is the site of RNA synthesis and processing. In some species, or in specialized cell types, RNA metabolism or DNA replication may be absent [goid 5634] [evidence ISA]	Any process that modulates the frequency, rate or extent of DNA-dependent transcription [goid 6355] [evidence IEA]; The synthesis of either RNA on a template of DNA or DNA on a template of RNA [goid 6350] [evidence IEA]; Any process that stops, prevents or reduces the frequency, rate or extent of transcription from an RNA polymerase II promoter [goid 122] [evidence ISA]	Interacting selectively with a transcription factor, any protein required to initiate or regulate transcription [goid 8134] [evidence ISA]; The function of a transcription cofactor that represses transcription from a RNA polymerase II promoter; does not bind DNA itself [goid 3714] [evidence ISA]	C530033F24; 6330414O09Rik	C530033F24; 6330414O09Rik
2650673	0.859177	3.8329	3.81745	0.00377892	0.0143564	-3.80773	Mus musculus	RefSeq	ILMN_214710	ILMN_214710	ERF	NM_010155.2	NM_010155.2	NA	13875	40254587	NM_010155.2	Erf	NP_034285.2	ILMN_2684661	2650673	S	1678	AGCACGCCACAGCCCAACTCTCCCTGGAGCACCGAGATTCCTGAGAGCTG	7	-	26029261-26029267:26029268-26029310	7qA3	Mus musculus Ets2 repressor factor (Erf), mRNA.	A membrane-bounded organelle of eukaryotic cells in which chromosomes are housed and replicated. In most cells, the nucleus contains all of the cell's chromosomes except the organellar chromosomes, and is the site of RNA synthesis and processing. In some species, or in specialized cell types, RNA metabolism or DNA replication may be absent [goid 5634] [evidence IEA]	Any process that modulates the frequency, rate or extent of DNA-dependent transcription [goid 6355] [evidence IEA]; The synthesis of either RNA on a template of DNA or DNA on a template of RNA [goid 6350] [evidence IEA]	Interacting selectively with DNA (deoxyribonucleic acid) [goid 3677] [evidence IEA]; The function of binding to a specific DNA sequence in order to modulate transcription. The transcription factor may or may not also interact selectively with a protein or macromolecular complex [goid 3700] [evidence IEA]; Interacting selectively with DNA of a specific nucleotide composition, e.g. GC-rich DNA bind…
5690022	1.12388	4.86016	3.8109	0.0038182	0.0144907	-3.81859	Mus musculus	RefSeq	ILMN_193595	ILMN_239463	TICAM1	NM_174989.3	NM_174989.3	NA	106759	144227224	NM_174989.3	Ticam1	NP_778154.1	ILMN_1220387	5690022	S	2153	GACTCCAGGACCTCAGCCTCTCATTATTCACCATGCCCAGATGGTTCAGC	17	-	56409448-56409497	17qD	Mus musculus toll-like receptor adaptor molecule 1 (Ticam1), mRNA.		A change in state or activity of a cell or an organism (in terms of movement, secretion, enzyme production, gene expression, etc.) as a result of a stimulus from a virus [goid 9615] [evidence IEA]; A form of programmed cell death induced by external or internal signals that trigger the activity of proteolytic caspases, whose actions dismantle the cell and result in cell death. Apoptosis begins in…		AW547018; TRIF; AW046014; TICAM-1	AW547018; TRIF; AW046014; TICAM-1
3400349	-0.488195	7.42109	-3.77522	0.00403962	0.0152499	-3.87776	Mus musculus	RefSeq	ILMN_221079	ILMN_247005	GPS2	NM_019726.3	NM_019726.3	NA	56310	118130652	NM_019726.3	Gps2	NP_062700.2	ILMN_2730784	3400349	S	1109	AACCCAAGATTCTATCACAAGTAACCACCAGAGAGCTCCAGCCCACCCTC	11	+	69728828-69728877	11qB3	Mus musculus G protein pathway suppressor 2 (Gps2), mRNA.				AI505953	AI505953
7160148	-0.865808	8.1477	-3.76984	0.00407415	0.0153645	-3.8867	Mus musculus	RefSeq	ILMN_194355	ILMN_260257	NONO	NM_023144.1	NM_023144.1	NA	53610	12963530	NM_023144.1	Nono	NP_075633.1	ILMN_2626779	7160148	S	2322	ATTGTTCCAGATACCTTCAGTTTGGAAAGTTTTCTGAGAAATGGAGACGT	X	+	98643851-98643900	XqD	Mus musculus non-POU-domain-containing, octamer binding protein (Nono), mRNA.	A membrane-bounded organelle of eukaryotic cells in which chromosomes are housed and replicated. In most cells, the nucleus contains all of the cell's chromosomes except the organellar chromosomes, and is the site of RNA synthesis and processing. In some species, or in specialized cell types, RNA metabolism or DNA replication may be absent [goid 5634] [evidence IEA]	Any process by which a new genotype is formed by reassortment of genes resulting in gene combinations different from those that were present in the parents. In eukaryotes genetic recombination can occur by chromosome assortment, intrachromosomal recombination, or nonreciprocal interchromosomal recombination. Intrachromosomal recombination occurs by crossing over. In bacteria it may occur by genet…	Interacting selectively with an RNA molecule or a portion thereof [goid 3723] [evidence IEA]; Interacting selectively with DNA (deoxyribonucleic acid) [goid 3677] [evidence IEA]; Interacting selectively with any nucleic acid [goid 3676] [evidence IEA]; Interacting selectively with a nucleotide, any compound consisting of a nucleoside that is esterified with (ortho)phosphate or an oligophosphate a…	AA407051; NRB54; MGC103109; AV149256; nonA; P54NRB	AA407051; NRB54; MGC103109; AV149256; nonA; P54NRB
6550474	0.448906	6.49804	3.75668	0.00415996	0.0156628	-3.90856	Mus musculus	RefSeq	ILMN_208852	ILMN_234028	SLC9A8	NM_178371.3	NM_178371.3	NA	77031	46909604	NM_178371.3	Slc9a8	NP_848458.2	ILMN_1230339	6550474	S	4111	GTGAGTGGTAGAGTTGTACTGAAGGCTCTCTTCACAAGCCTGGGTTTCTT	2	+	167302180-167302229	2qH3	Mus musculus solute carrier family 9 (sodium/hydrogen exchanger), member 8 (Slc9a8), transcript variant 2, mRNA.	A compound membranous cytoplasmic organelle of eukaryotic cells, consisting of flattened, ribosome-free vesicles arranged in a more or less regular stack. The Golgi apparatus differs from the endoplasmic reticulum in often having slightly thicker membranes, appearing in sections as a characteristic shallow semicircle so that the convex side (cis or entry face) abuts the endoplasmic reticulum, sec…	The directed movement of charged atoms or small charged molecules into, out of, within or between cells [goid 6811] [evidence IEA]; The directed movement of substances (such as macromolecules, small molecules, ions) into, out of, within or between cells, or within a multicellular organism [goid 6810] [evidence IEA]; The directed movement of sodium ions (Na+) into, out of, within or between cells …	Enables the active transport of a solute across a membrane by a mechanism whereby two or more species are transported in opposite directions in a tightly coupled process not directly linked to a form of energy other than chemiosmotic energy [goid 15297] [evidence IEA]; Interacting selectively with sodium ions (Na+) [goid 31402] [evidence IEA]; Catalysis of the transfer of a solute or solutes from…	1200006P13Rik; 6430709P13Rik; NHE8; AI182282	1200006P13Rik; 6430709P13Rik; NHE8; AI182282
6370296	-1.35509	4.53165	-3.74928	0.00420903	0.0158382	-3.92086	Mus musculus	RefSeq	ILMN_214934	ILMN_237223	CCDC115	NM_027159.1	NM_027159.1	NA	69668	58037168	NM_027159.1	Ccdc115	NP_081435.1	ILMN_2672035	6370296	S	346	AGGCTCTGCGAGAGGAGTTGGACTCCAAGTGCCTACAGCTGCTCAGTGAC	1	-	34496122-34496171	1qB	Mus musculus coiled-coil domain containing 115 (Ccdc115), mRNA.	A cytoplasmic, membrane-bounded organelle that is found in most animal cells and that contains a variety of hydrolases, most of which have their maximal activities in the pH range 5-6. The contained enzymes display latency if properly isolated. About 40 different lysosomal hydrolases are known and lysosomes have a great variety of morphologies and functions [goid 5764] [evidence IDA]	Any process specifically pertinent to the functioning of integrated living units: cells, tissues, organs, and organisms. A process is a collection of molecular events with a defined beginning and end [goid 8150] [evidence ND ]	Elemental activities, such as catalysis or binding, describing the actions of a gene product at the molecular level. A given gene product may exhibit one or more molecular functions [goid 3674] [evidence ND ]	Ccp1; 2310061I09Rik	Ccp1; 2310061I09Rik
10717	0.518717	6.95024	3.73203	0.00432583	0.0162397	-3.94955	Mus musculus	RefSeq	ILMN_223170	ILMN_223170	B9D2	NM_172148.1	NM_172148.1	NA	232987	26024310	NM_172148.1	B9d2	NP_742160.1	ILMN_2760226	10717	S	952	GGAGGGACATGAGCAGGGCCCACTGTTTGGACTGTCGGGGGCACTTAATA	7	+	26471508-26471557	7qA3	Mus musculus B9 protein domain 2 (B9d2), mRNA.				MGC41256	MGC41256
5890390	-1.27863	5.0573	-3.72417	0.00438015	0.0164221	-3.96263	Mus musculus	RefSeq	ILMN_208690	ILMN_208690	CHMP7	NM_134078.3	NM_134078.3	NA	105513	141801415	NM_134078.3	Chmp7	NP_598839.2	ILMN_2750098	5890390	S	923	ACGCATTGAGGCCCTGCATGCCAAGCTGGACACTGTTCAAGGCATCCTGG	14	-	70119586-70119635	14qD2	Mus musculus CHMP family, member 7 (Chmp7), mRNA.	All of the contents of a cell excluding the plasma membrane and nucleus, but including other subcellular structures [goid 5737] [evidence IEA]	The directed movement of proteins into, out of, within or between cells [goid 15031] [evidence IEA]; The directed movement of substances (such as macromolecules, small molecules, ions) into, out of, within or between cells, or within a multicellular organism [goid 6810] [evidence IEA]		AW550775; 4930596K11Rik; 6330407G04Rik; AI450338; MGC29816	AW550775; 4930596K11Rik; 6330407G04Rik; AI450338; MGC29816
2690195	0.13893	8.92592	3.71711	0.00442963	0.0165858	-3.9744	Mus musculus	RefSeq	ILMN_221306	ILMN_256178	MKNK2	NM_021462.3	NM_021462.3	NA	17347	133892866	NM_021462.3	Mknk2	NP_067437.1	ILMN_2733887	2690195	S	2830	CTTCCAAGCCCGACCTGGAGGATGGGTCAGACCCCTTAACTGTGAATGAG	10	-	80128262-80128311	10qC1	Mus musculus MAP kinase-interacting serine/threonine kinase 2 (Mknk2), mRNA.		A series of reactions, mediated by protein kinases, which occurs as a result of a single trigger reaction or compound [goid 7243] [evidence IDA]; Any process that modulates the frequency, rate or extent of the chemical reactions and pathways resulting in the formation of proteins by the translation of mRNA [goid 6417] [evidence IEA]; The process of introducing a phosphate group on to a protein [g…	Catalysis of the transfer of a phosphate group, usually from ATP, to a substrate molecule [goid 16301] [evidence IEA]; Interacting selectively with magnesium (Mg) ions [goid 287] [evidence IEA]; Interacting selectively with a nucleotide, any compound consisting of a nucleoside that is esterified with (ortho)phosphate or an oligophosphate at any hydroxyl group on the ribose or deoxyribose moiety […	2010016G11Rik; Mnk2; Gprk7	2010016G11Rik; Mnk2; Gprk7
5670040	0.809598	6.72459	3.70934	0.00448469	0.0167724	-3.98734	Mus musculus	RefSeq	ILMN_218693	ILMN_218693	CRYBG3	NM_174848.2	NM_174848.2	NA	224273	31341295	NM_174848.2	Crybg3	NP_777273.1	ILMN_2699028	5670040	S	5167	GTGTACTGCAGTTGTGCCTTTTCTACAACACTGCATTGAATAAACTTGTC	16	-	59491928-59491977	16qC1.3	Mus musculus beta-gamma crystallin domain containing 3 (Crybg3), mRNA.			Interacting selectively with any mono-, di- or trisaccharide carbohydrate [goid 5529] [evidence IEA]	5031404N19; MGC58045; AU022790	5031404N19; MGC58045; AU022790
1580707	-1.62212	5.52627	-3.70553	0.00451196	0.0168621	-3.99369	Mus musculus	RefSeq	ILMN_210122	ILMN_210122	SNX5	NM_024225.4	NM_024225.4	NA	69178	146141133	NM_024225.4	Snx5	NP_077187.1	ILMN_2602462	1580707	S	1202	GAAGAGAGTGGCAGCATTTCGAAAGAACCTAATCGAAATGTCTGAACTGG				2qG1	Mus musculus sorting nexin 5 (Snx5), mRNA. XM_001004302		The directed movement of proteins into, out of, within or between cells [goid 15031] [evidence IEA]; The directed movement of substances (such as macromolecules, small molecules, ions) into, out of, within or between cells, or within a multicellular organism [goid 6810] [evidence IEA]; Any process that mediates interactions between a cell and its surroundings. Encompasses interactions such as sig…	Interacting selectively with any inositol-containing glycerophospholipid [goid 35091] [evidence IEA]; Interacting selectively with any protein or protein complex (a complex of two or more proteins that may include other nonprotein molecules) [goid 5515] [evidence IEA]	0910001N05Rik; 1810032P22Rik; D2Ertd52e; AU019504	0910001N05Rik; 1810032P22Rik; D2Ertd52e; AU019504
2350324	0.580043	6.54929	3.70245	0.00453412	0.0169375	-3.99882	Mus musculus	RefSeq	ILMN_215961	ILMN_215961	GSTT3	NM_133994.3	NM_133994.3	NA	103140	133892397	NM_133994.3	Gstt3	NP_598755.1	ILMN_2665715	2350324	S	1790	CCGGCTCCAAACTGTCAAGCTACTTAATCTTGTGCCATAAGACGTCTTTT	10	-	75237468-75237517	10qC1	Mus musculus glutathione S-transferase, theta 3 (Gstt3), mRNA.	The part of a cell or its extracellular environment in which a gene product is located. A gene product may be located in one or more parts of a cell and its location may be as specific as a particular macromolecular complex, that is, a stable, persistent association of macromolecules that function together [goid 5575] [evidence ND ]	The chemical reactions and pathways involving glutathione, the tripeptide glutamylcysteinylglycine, which acts as a coenzyme for some enzymes and as an antioxidant in the protection of sulfhydryl groups in enzymes and other proteins; it has a specific role in the reduction of hydrogen peroxide (H2O2) and oxidized ascorbate, and it participates in the gamma-glutamyl cycle [goid 6749] [evidence IDA]	Catalysis of the transfer of a group, e.g. a methyl group, glycosyl group, acyl group, phosphorus-containing, or other groups, from one compound (generally regarded as the donor) to another compound (generally regarded as the acceptor). Transferase is the systematic name for any enzyme of EC class 2 [goid 16740] [evidence IEA]; Catalysis of the reaction: R-X + glutathione = H-X + R-S-glutathione.…	AI118089	AI118089
7330019	0.703332	6.49435	3.70042	0.00454873	0.0169773	-4.00219	Mus musculus	RefSeq	ILMN_223615	ILMN_223615	LOH12CR1	NM_026371.2	NM_026371.2	NA	67774	27754072	NM_026371.2	Loh12cr1	NP_080647.2	ILMN_1218940	7330019	S	1145	GCTATGCATTGGCCCCCATCACATCAAGGAGGTATCTGGCACTGTCTTCC	6	+	134660627-134660676	6qG1	Mus musculus loss of heterozygosity, 12, chromosomal region 1 homolog (human) (Loh12cr1), mRNA.	The part of a cell or its extracellular environment in which a gene product is located. A gene product may be located in one or more parts of a cell and its location may be as specific as a particular macromolecular complex, that is, a stable, persistent association of macromolecules that function together [goid 5575] [evidence ND ]	Any process specifically pertinent to the functioning of integrated living units: cells, tissues, organs, and organisms. A process is a collection of molecular events with a defined beginning and end [goid 8150] [evidence ND ]	Elemental activities, such as catalysis or binding, describing the actions of a gene product at the molecular level. A given gene product may exhibit one or more molecular functions [goid 3674] [evidence ND ]	AW124643; 5830457J20Rik	5830457J20Rik; AW124643
4050524	-1.38667	5.06692	-3.68551	0.00465805	0.0173514	-4.02706	Mus musculus	RefSeq	ILMN_217489	ILMN_217489	RNF138	NM_019706.2	NM_019706.2	NA	56515	46488938	NM_019706.2	Rnf138	NP_062680.2	ILMN_2683822	4050524	S	310	GAGGAACTTTCGGCGGCCACGTCCTACACGGAAGATGATTTCTACTGCCC	18	+	21160567-21160616	18qA2	Mus musculus ring finger protein 138 (Rnf138), transcript variant 2, mRNA.	The part of a cell or its extracellular environment in which a gene product is located. A gene product may be located in one or more parts of a cell and its location may be as specific as a particular macromolecular complex, that is, a stable, persistent association of macromolecules that function together [goid 5575] [evidence ND ]; The living contents of a cell; the matter contained within (but…	The chemical reactions and pathways resulting in the breakdown of a protein or peptide by hydrolysis of its peptide bonds, initiated by the covalent attachment of a ubiquitin moiety, or multiple ubiquitin moieties, to the protein [goid 6511] [evidence IEA]; Any process specifically pertinent to the functioning of integrated living units: cells, tissues, organs, and organisms. A process is a colle…	Interacting selectively with any metal ion [goid 46872] [evidence IEA]; Catalysis of the ligation of two substances with concomitant breaking of a diphosphate linkage, usually in a nucleoside triphosphate. Ligase is the systematic name for any enzyme of EC class 6 [goid 16874] [evidence IEA]; Interacting selectively with zinc (Zn) ions [goid 8270] [evidence IEA]; Elemental activities, such as cat…	STRIN; Trif; Trif-d; 2410015A17Rik; 2810480D20Rik	STRIN; Trif; Trif-d; 2410015A17Rik; 2810480D20Rik
7160390	-1.02453	3.86134	-3.68011	0.00469829	0.0174695	-4.03606	Mus musculus	RefSeq	ILMN_185881	ILMN_185881	ZFP398	NM_173034.2	NM_173034.2	NA	272347	142353529	NM_173034.2	Zfp398	NP_766622.1	ILMN_2430804	7160390	S	2460	AAGAGCCCAGAGACCCCAGGCACAACAGGGATCATCACATGGCCTAAAAA	6	+	47817668-47817717	6qB2.3	Mus musculus zinc finger protein 398 (Zfp398), transcript variant 2, mRNA.	A membrane-bounded organelle of eukaryotic cells in which chromosomes are housed and replicated. In most cells, the nucleus contains all of the cell's chromosomes except the organellar chromosomes, and is the site of RNA synthesis and processing. In some species, or in specialized cell types, RNA metabolism or DNA replication may be absent [goid 5634] [evidence IEA]		Interacting selectively with zinc (Zn) ions [goid 8270] [evidence IEA]; Interacting selectively with any metal ion [goid 46872] [evidence IEA]	5730513I23Rik; 6430539K21	5730513I23Rik; 6430539K21
6040215	-0.290072	11.9211	-3.67912	0.00470577	0.0174923	-4.03773	Mus musculus	RefSeq	ILMN_209068	ILMN_209068	PIGP	NM_019543.2	NM_019543.2	NA	56176	31980951	NM_019543.2	Pigp	NP_062416.1	ILMN_2592239	6040215	S	408	GCTTTCGTTCCCGAATCTTGGTTAAACTCCTTAGGCTTAACTTACTGGCC	16	-	94592144-94592193	16qC4	Mus musculus phosphatidylinositol glycan anchor biosynthesis, class P (Pigp), mRNA.	Double layer of lipid molecules that encloses all cells, and, in eukaryotes, many organelles; may be a single or double lipid bilayer; also includes associated proteins [goid 16020] [evidence IEA]; Penetrating at least one phospholipid bilayer of a membrane. May also refer to the state of being buried in the bilayer with no exposure outside the bilayer. When used to describe a protein, indicates …	The chemical reactions and pathways resulting in the formation of a glycosylphosphatidylinositol (GPI) anchor that attaches some membrane proteins to the lipid bilayer of the cell membrane. The phosphatidylinositol moiety is linked via the C-6 hydroxyl residue of inositol to a carbohydrate chain which is itself linked to the protein via an ethanolamine phosphate moiety, its amino group forming an…	Catalysis of the transfer of a group, e.g. a methyl group, glycosyl group, acyl group, phosphorus-containing, or other groups, from one compound (generally regarded as the donor) to another compound (generally regarded as the acceptor). Transferase is the systematic name for any enzyme of EC class 2 [goid 16740] [evidence IEA]; Catalysis of the transfer of a glycosyl group from one compound (dono…	Dscr5; Dcrc	Dscr5; Dcrc
6060646	0.917126	7.40092	3.674	0.00474433	0.0176254	-4.04627	Mus musculus	RefSeq	ILMN_209856	ILMN_209856	PBX2	NM_017463.2	NM_017463.2	NA	18515	145386579	NM_017463.2	Pbx2	NP_059491.1	ILMN_2599858	6060646	S	2466	TGCCAAATACGCTAAATATGGGCTGGGTGCTTCTATATGTGTCTCCCCCA				17qB1	Mus musculus pre B-cell leukemia transcription factor 2 (Pbx2), mRNA.	Any complex, distinct from RNA polymerase, including one or more polypeptides capable of binding DNA at promoters or at cis-acting regulatory sequences, and regulating transcription [goid 5667] [evidence IDA]; A membrane-bounded organelle of eukaryotic cells in which chromosomes are housed and replicated. In most cells, the nucleus contains all of the cell's chromosomes except the organellar chro…	Any process that modulates the frequency, rate or extent of DNA-dependent transcription [goid 6355] [evidence IEA]; The synthesis of either RNA on a template of DNA or DNA on a template of RNA [goid 6350] [evidence IEA]; Any process that modulates the frequency, rate or extent of the synthesis of either RNA on a template of DNA or DNA on a template of RNA [goid 45449] [evidence IEA]; Any process …	Interacting selectively with any protein or protein complex (a complex of two or more proteins that may include other nonprotein molecules) [goid 5515] [evidence IPI]; The function of binding to a specific DNA sequence in order to modulate transcription. The transcription factor may or may not also interact selectively with a protein or macromolecular complex [goid 3700] [evidence IDA]; Interacti…	G17; AU043397	G17; AU043397
6220142	-1.48728	5.47729	-3.67275	0.00475381	0.017653	-4.04836	Mus musculus	RefSeq	ILMN_208887	ILMN_208887	KHDRBS3	NM_010158.2	NM_010158.2	NA	13992	117647235	NM_010158.2	Khdrbs3	NP_034288.2	ILMN_2590488	6220142	S	1001	CCGAGGAGTCCTTTCCACCCGAGGGCCAGTGAGCCGGGGAAGAGGCCTTC	15	+	68860208-68860257	15qD3	Mus musculus KH domain containing, RNA binding, signal transduction associated 3 (Khdrbs3), mRNA.	A membrane-bounded organelle of eukaryotic cells in which chromosomes are housed and replicated. In most cells, the nucleus contains all of the cell's chromosomes except the organellar chromosomes, and is the site of RNA synthesis and processing. In some species, or in specialized cell types, RNA metabolism or DNA replication may be absent [goid 5634] [evidence IEA]	Any process that modulates the frequency, rate or extent of DNA-dependent transcription [goid 6355] [evidence IEA]; The synthesis of either RNA on a template of DNA or DNA on a template of RNA [goid 6350] [evidence IEA]	Interacting selectively with an RNA molecule or a portion thereof [goid 3723] [evidence IEA]; Interacting selectively with any protein or protein complex (a complex of two or more proteins that may include other nonprotein molecules) [goid 5515] [evidence IPI]; Interacting selectively with a SH3 domain (Src homology 3) of a protein, small protein modules containing approximately 50 amino acid res…	Slm2; T-STAR; SLM-2; Etle	Slm2; T-STAR; SLM-2; Etle
2490091	-0.34009	7.75618	-3.66619	0.00480376	0.0178205	-4.0593	Mus musculus	RefSeq	ILMN_190082	ILMN_236678	BBX	NM_027444.2	NM_027444.2	NA	70508	141802692	NM_027444.2	Bbx	NP_081720.1	ILMN_2669461	2490091	S	3321	GCTGCCTTTGCTGTAGCTCATCCAGCACCTCTTTTACCAACCAGAGAGCG	16	-	50197320-50197369	16qB5	Mus musculus bobby sox homolog (Drosophila) (Bbx), mRNA.	A membrane-bounded organelle of eukaryotic cells in which chromosomes are housed and replicated. In most cells, the nucleus contains all of the cell's chromosomes except the organellar chromosomes, and is the site of RNA synthesis and processing. In some species, or in specialized cell types, RNA metabolism or DNA replication may be absent [goid 5634] [evidence IEA]	Any process that modulates the frequency, rate or extent of DNA-dependent transcription [goid 6355] [evidence IEA]; The synthesis of either RNA on a template of DNA or DNA on a template of RNA [goid 6350] [evidence IEA]	Interacting selectively with DNA (deoxyribonucleic acid) [goid 3677] [evidence IEA]	5730403O13Rik	5730403O13Rik
7100632	0.340648	14.1048	3.65347	0.00490235	0.0181395	-4.08055	Mus musculus	RefSeq	ILMN_209682	ILMN_310393	LOC100048483	XM_001480453.1	XM_001480453.1	NA	100048483	149241413	XM_001480453.1	LOC100048483	XP_001480503.1	ILMN_2598201	7100632	S	257	CATCCTTTGACTAGACCACTTTTGCCAGCCCACCTTGATCATGTTGCCTG					PREDICTED: Mus musculus similar to cytochrome c oxidase subunit VIII (LOC100048483), mRNA.
3390608	-0.434901	7.21142	-3.64333	0.00498245	0.0184168	-4.0975	Mus musculus	RefSeq	ILMN_209806	ILMN_209806	4732471D19RIK	NM_176987.3	NM_176987.3	NA	319719	88196777	NM_176987.3	4732471D19Rik	NP_795961.2	ILMN_2599392	3390608	S	2880	CTTCTGCACAATCCATCAGTGTTACACTGGTCAAGATACTGACGGCCCGC	13	+	54652305-54652354	13qB1	Mus musculus RIKEN cDNA 4732471D19 gene (4732471D19Rik), mRNA.
2680746	0.942229	6.47887	3.63947	0.00501328	0.0185202	-4.10395	Mus musculus	RefSeq	ILMN_217193	ILMN_217193	ZC3H13	NM_026083.2	NM_026083.2	NA	67302	61742809	NM_026083.2	Zc3h13	NP_080359.2	ILMN_2680128	2680746	S	2314	GAGACACTCGGGATCCGGCCAGGGATTCTTCCTTTGAGAGAAGGCATGGA	14	+	75724331-75724380	14qD3	Mus musculus zinc finger CCCH type containing 13 (Zc3h13), mRNA.			Interacting selectively with any metal ion [goid 46872] [evidence IEA]; Interacting selectively with zinc (Zn) ions [goid 8270] [evidence IEA]	C87618; 4930570G11Rik; 3110050K21Rik; 2600010B19Rik	C87618; 4930570G11Rik; 3110050K21Rik; 2600010B19Rik
6130561	1.24108	4.03243	3.63848	0.00502118	0.0185467	-4.1056	Mus musculus	RefSeq	ILMN_212726	ILMN_212726	PLAU	NM_008873.2	NM_008873.2	NA	18792	31560816	NM_008873.2	Plau	NP_032899.1	ILMN_2629582	6130561	S	1972	CTCCAGACTGTGATGCGGGGCCATTTGGTCTTCCATGTGATGCTCCACGT	14	+	21662284-21662333	14qA3	Mus musculus plasminogen activator, urokinase (Plau), mRNA.	The space external to the outermost structure of a cell. For cells without external protective or external encapsulating structures this refers to space outside of the plasma membrane. This term covers the host cell environment outside an intracellular parasite [goid 5576] [evidence IEA]	The hydrolysis of a peptide bond or bonds within a protein [goid 6508] [evidence IEA]; A change in state or activity of a cell or an organism (in terms of movement, secretion, enzyme production, gene expression, etc.) as a result of a stimulus indicating lowered oxygen tension. Hypoxia, defined as a decline in O2 levels below normoxic levels of 20.8 - 20.95%, results in metabolic adaptation at bo…	Catalysis of the hydrolysis of various bonds, e.g. C-O, C-N, C-C, phosphoric anhydride bonds, etc. Hydrolase is the systematic name for any enzyme of EC class 3 [goid 16787] [evidence IEA]; Catalysis of the hydrolysis of a peptide bond. A peptide bond is a covalent bond formed when the carbon atom from the carboxyl group of one amino acid shares electrons with the nitrogen atom from the amino gro…	uPA; u-PA	uPA; u-PA
3370577	0.797301	5.70677	3.63442	0.00505389	0.0186621	-4.11238	Mus musculus	RefSeq	ILMN_215503	ILMN_215503	NARFL	NM_026238.3	NM_026238.3	NA	67563	141802092	NM_026238.3	Narfl	NP_080514.2	ILMN_1232240	3370577	S	2459	GGAGGGCCCTTAATAAATGACCTTCTCTGGTGCCAGGGACATTCAGCTCA	17	+	25920205-25920254	17qA3.3	Mus musculus nuclear prelamin A recognition factor-like (Narfl), mRNA.	A membrane-bounded organelle of eukaryotic cells in which chromosomes are housed and replicated. In most cells, the nucleus contains all of the cell's chromosomes except the organellar chromosomes, and is the site of RNA synthesis and processing. In some species, or in specialized cell types, RNA metabolism or DNA replication may be absent [goid 5634] [evidence IEA]			9030612I22Rik; PRN; AI504405	9030612I22Rik; PRN; AI504405
460364	0.484245	7.91946	3.62865	0.0051008	0.018811	-4.12204	Mus musculus	RefSeq	ILMN_190986	ILMN_249913	PITPNC1	NM_145823.2	NM_145823.2	NA	71795	84490397	NM_145823.2	Pitpnc1	NP_665822.1	ILMN_2705846	460364	S	1164	GCCAAAGACCTCGAGAGAGAAGTGTGCTTCATCGATATCGCCTGTGATGA	11	-	107113366-107113415	11qE1	Mus musculus phosphatidylinositol transfer protein, cytoplasmic 1 (Pitpnc1), mRNA. XM_001002025 XM_001002036	A membrane-bounded organelle of eukaryotic cells in which chromosomes are housed and replicated. In most cells, the nucleus contains all of the cell's chromosomes except the organellar chromosomes, and is the site of RNA synthesis and processing. In some species, or in specialized cell types, RNA metabolism or DNA replication may be absent [goid 5634] [evidence IEA]; All of the contents of a cell…	The directed movement of substances (such as macromolecules, small molecules, ions) into, out of, within or between cells, or within a multicellular organism [goid 6810] [evidence IEA]; The directed movement of lipids into, out of, within or between cells. Lipids are compounds soluble in an organic solvent but not, or sparingly, in an aqueous solvent [goid 6869] [evidence IEA]; The chemical react…	Interacting selectively with a lipid [goid 8289] [evidence IEA]; Enables the directed movement of phosphatidylinositol into, out of, within or between cells. Phosphatidylinositol refers to any glycophospholipids with its sn-glycerol 3-phosphate residue is esterified to the 1-hydroxyl group of 1D-myo-inositol [goid 8526] [evidence ISO]	Dnr411; RDGBB; rdgB-beta; RDGBB1; C330017I21Rik; AI851387; 1110020B03Rik; AI662802; 5830436L09Rik; MGC118005	Dnr411; RDGBB; rdgB-beta; RDGBB1; C330017I21Rik; AI851387; 1110020B03Rik; AI662802; 5830436L09Rik; MGC118005
4200669	-1.18183	5.36729	-3.62702	0.00511411	0.018852	-4.12477	Mus musculus	RefSeq	ILMN_212032	ILMN_212032	GRK5	NM_018869.2	NM_018869.2	NA	14773	31980924	NM_018869.2	Grk5	NP_061357.2	ILMN_1249435	4200669	S	1547	GCAGTTCTCCACTGTGAAAGGTGTCAACCTGGACCATACGGACGATGATT	19	+	61165852-61165901	19qD3	Mus musculus G protein-coupled receptor kinase 5 (Grk5), mRNA.		The process of introducing a phosphate group on to a protein [goid 6468] [evidence IEA]; The cascade of processes by which a signal interacts with a receptor, causing a change in the level or activity of a second messenger or other downstream target, and ultimately effecting a change in the functioning of the cell [goid 7165] [evidence IEA]	Catalysis of the transfer of a phosphate group, usually from ATP, to a substrate molecule [goid 16301] [evidence IEA]; Interacting selectively with a nucleotide, any compound consisting of a nucleoside that is esterified with (ortho)phosphate or an oligophosphate at any hydroxyl group on the ribose or deoxyribose moiety [goid 166] [evidence IEA]; Catalysis of the reaction: ATP + a protein serine/…	Gprk5; GRK5	Gprk5; GRK5
1660088	-0.889519	4.97362	-3.62586	0.0051236	0.0188843	-4.12671	Mus musculus	RefSeq	ILMN_213988	ILMN_213988	TMEM169	NM_175564.4	NM_175564.4	NA	271711	146198521	NM_175564.4	Tmem169	NP_780773.1	ILMN_2643021	1660088	S	2704	CCAGAGGGGTTGATCAAGCTCCCCCAAAACCAGCCAGGGACATTTATTTA				1qC3	Mus musculus transmembrane protein 169 (Tmem169), mRNA.	Penetrating at least one phospholipid bilayer of a membrane. May also refer to the state of being buried in the bilayer with no exposure outside the bilayer. When used to describe a protein, indicates that all or part of the peptide sequence is embedded in the membrane [goid 16021] [evidence IEA]; Double layer of lipid molecules that encloses all cells, and, in eukaryotes, many organelles; may be…			A830020B06Rik	A830020B06Rik
3440537	0.238703	9.96817	3.61825	0.00518636	0.0191019	-4.13943	Mus musculus	RefSeq	ILMN_221819	ILMN_221819	RELA	NM_009045.4	NM_009045.4	NA	19697	118130517	NM_009045.4	Rela	NP_033071.1	ILMN_2740859	3440537	S	2600	TAGAGTCAGGAGGGCAGGCTAGATGCTCAGCCACAAGACAGCCTTTACTG	19	+	5648021-5648070	19qA	Mus musculus v-rel reticuloendotheliosis viral oncogene homolog A (avian) (Rela), mRNA.	All of the contents of a cell excluding the plasma membrane and nucleus, but including other subcellular structures [goid 5737] [evidence IDA]; All of the contents of a cell excluding the plasma membrane and nucleus, but including other subcellular structures [goid 5737] [evidence ISO]; A membrane-bounded organelle of eukaryotic cells in which chromosomes are housed and replicated. In most cells,…	The process whose specific outcome is the progression of the liver over time, from its formation to the mature structure. The liver is an exocrine gland which secretes bile and functions in metabolism of protein and carbohydrate and fat, synthesizes substances involved in the clotting of the blood, synthesizes vitamin A, detoxifies poisonous substances, stores glycogen, and breaks down worn-out e…	The function of binding to a specific DNA sequence in order to modulate transcription. The transcription factor may or may not also interact selectively with a protein or macromolecular complex [goid 3700] [evidence IDA]; Interacting selectively with DNA (deoxyribonucleic acid) [goid 3677] [evidence IDA]; Interacting selectively with DNA (deoxyribonucleic acid) [goid 3677] [evidence ISO]; Interac…	p65	p65
4290440	1.08628	4.74987	3.60966	0.00525823	0.0193472	-4.15381	Mus musculus	RefSeq	ILMN_194878	ILMN_227280	KCNN1	NM_032397.1	NM_032397.1	NA	84036	14161695	NM_032397.1	Kcnn1	NP_115773.1	ILMN_2664556	4290440	S	2741	GAAACATGGACCCATCCTGCCCCTTCTGAGCCCAGTGTTAGCTCCTGTCC	8	-	73367230-73367279	8qB3.3	Mus musculus potassium intermediate/small conductance calcium-activated channel, subfamily N, member 1 (Kcnn1), mRNA.	Penetrating at least one phospholipid bilayer of a membrane. May also refer to the state of being buried in the bilayer with no exposure outside the bilayer. When used to describe a protein, indicates that all or part of the peptide sequence is embedded in the membrane [goid 16021] [evidence IEA]; Double layer of lipid molecules that encloses all cells, and, in eukaryotes, many organelles; may be…	The directed movement of substances (such as macromolecules, small molecules, ions) into, out of, within or between cells, or within a multicellular organism [goid 6810] [evidence IEA]; The directed movement of charged atoms or small charged molecules into, out of, within or between cells [goid 6811] [evidence IEA]; The directed movement of potassium ions (K+) into, out of, within or between cell…	Interacting selectively with calmodulin, a calcium-binding protein with many roles, both in the calcium-bound and calcium-free states [goid 5516] [evidence IDA]; Catalysis of the transmembrane transfer of potassium by a channel with a unit conductance of 2 to 20 picoSiemens that opens in response to stimulus by internal calcium ions. Small conductance calcium-activated potassium channels are more…	MGC115869; SK1; AI854248	MGC115869; SK1; AI854248
1940736	0.775655	6.07518	3.58502	0.00547017	0.0200609	-4.19508	Mus musculus	RefSeq	ILMN_215941	ILMN_215941	PTPRR	NM_011217.1	NM_011217.1	NA	19279	6755247	NM_011217.1	Ptprr	NP_035347.1	ILMN_2706730	1940736	S	2730	CCCTGTTGTAAGTGCTATTAACTATCTCAGTTACCAGAATCTTGCTGCTC	10	+	115711285-115711334	10qD2	Mus musculus protein tyrosine phosphatase, receptor type, R (Ptprr), mRNA.	All of the contents of a cell excluding the plasma membrane and nucleus, but including other subcellular structures [goid 5737] [evidence IEA]; Penetrating at least one phospholipid bilayer of a membrane. May also refer to the state of being buried in the bilayer with no exposure outside the bilayer. When used to describe a protein, indicates that all or part of the peptide sequence is embedded i…	The process of removing one or more phosphoric (ester or anhydride) residues from a molecule [goid 16311] [evidence IEA]; The process of removing one or more phosphoric residues from a protein [goid 6470] [evidence IEA]	Catalysis of the hydrolysis of various bonds, e.g. C-O, C-N, C-C, phosphoric anhydride bonds, etc. Hydrolase is the systematic name for any enzyme of EC class 3 [goid 16787] [evidence IEA]; Catalysis of the reaction: a phosphoprotein + H2O = a protein + phosphate. Together with protein kinases, these enzymes control the state of phosphorylation of cell proteins and thereby provide an important me…	Gmcp1; PTPBR7; PTP-SL; mPTP213	Gmcp1; PTPBR7; PTP-SL; mPTP213
2320487	-1.26077	3.93094	-3.57305	0.00557641	0.0204117	-4.21515	Mus musculus	RefSeq	ILMN_219607	ILMN_219607	ELMOD2	NM_178736.4	NM_178736.4	NA	244548	142367620	NM_178736.4	Elmod2	NP_848851.2	ILMN_1219931	2320487	S	4267	GTGGATGCTTGAGCTGCCCCTCATCCCTATTTAAGTCGTTTGAGTTCAGG	8	-	85836862-85836911	8qC2	Mus musculus ELMO domain containing 2 (Elmod2), mRNA.	Any of the various filamentous elements that form the internal framework of cells, and typically remain after treatment of the cells with mild detergent to remove membrane constituents and soluble components of the cytoplasm. The term embraces intermediate filaments, microfilaments, microtubules, the microtrabecular lattice, and other structures characterized by a polymeric filamentous nature and…	The process whereby phagocytes engulf external particulate material. The particles are initially contained within phagocytic vacuoles (phagosomes), which then fuse with primary lysosomes to effect digestion of the particles [goid 6909] [evidence IEA]; Any process specifically pertinent to the functioning of integrated living units: cells, tissues, organs, and organisms. A process is a collection …	Elemental activities, such as catalysis or binding, describing the actions of a gene product at the molecular level. A given gene product may exhibit one or more molecular functions [goid 3674] [evidence ND ]	9830169G11Rik	9830169G11Rik
770327	-0.296999	9.47415	-3.57133	0.00559177	0.0204572	-4.21802	Mus musculus	RefSeq	ILMN_222275	ILMN_222275	RAF1	NM_029780.3	NM_029780.3	NA	110157	142380030	NM_029780.3	Raf1	NP_084056.1	ILMN_2747229	770327	S	2493	GACTACTCACAGGGCCTTAACTTCATATTGCCTTCTTTTCTACCCCTCCT	6	-	115569114-115569163	6qE3	Mus musculus v-raf-leukemia viral oncogene 1 (Raf1), mRNA.	The membrane surrounding a cell that separates the cell from its external environment. It consists of a phospholipid bilayer and associated proteins [goid 5886] [evidence TAS]; That part of the cytoplasm that does not contain membranous or particulate subcellular components [goid 5829] [evidence TAS]	The process of introducing a phosphate group on to a protein [goid 6468] [evidence IEA]; A series of reactions within the cell that occur as a result of a single trigger reaction or compound [goid 7242] [evidence IEA]; The cascade of processes by which a signal interacts with a receptor, causing a change in the level or activity of a second messenger or other downstream target, and ultimately eff…	Interacting selectively with diacylglycerol, a diester of glycerol and two fatty acids [goid 19992] [evidence IEA]; Catalysis of the transfer of a phosphate group, usually from ATP, to a substrate molecule [goid 16301] [evidence IEA]; Interacting selectively with a nucleotide, any compound consisting of a nucleoside that is esterified with (ortho)phosphate or an oligophosphate at any hydroxyl gro…	Raf-1; MGC102375; c-Raf; BB129353; AA990557; D830050J10Rik; Craf1; v-Raf; 6430402F14Rik	Raf-1; MGC102375; c-Raf; v-Raf; BB129353; AA990557; D830050J10Rik; Craf1; 6430402F14Rik
6450128	1.24221	4.05071	3.5697	0.00560646	0.0205051	-4.22076	Mus musculus	RefSeq	ILMN_209917	ILMN_209917	MPO	NM_010824.1	NM_010824.1	NA	17523	6754731	NM_010824.1	Mpo	NP_034954.1	ILMN_2719256	6450128	S	1721	GCCTGAATCCTCGATGGAATGGGGAGAAGCTCTACCAGGAGGCCCGGAAG	11	+	87613463-87613512	11qC	Mus musculus myeloperoxidase (Mpo), nuclear gene encoding mitochondrial protein, mRNA.	A cytoplasmic, membrane-bounded organelle that is found in most animal cells and that contains a variety of hydrolases, most of which have their maximal activities in the pH range 5-6. The contained enzymes display latency if properly isolated. About 40 different lysosomal hydrolases are known and lysosomes have a great variety of morphologies and functions [goid 5764] [evidence IEA]; A semiauton…	A change in state or activity of a cell or an organism (in terms of movement, secretion, enzyme production, gene expression, etc.) as a result of oxidative stress, a state often resulting from exposure to high levels of reactive oxygen species, e.g. superoxide anions, hydrogen peroxide (H2O2), and hydroxyl radicals [goid 6979] [evidence IEA]; The chemical reactions and pathways resulting in the b…	Interacting selectively with calcium ions (Ca2+) [goid 5509] [evidence IEA]; Interacting selectively with iron (Fe) ions [goid 5506] [evidence IEA]; Catalysis of an oxidation-reduction (redox) reaction, a reversible chemical reaction in which the oxidation state of an atom or atoms within a molecule is altered. One substrate acts as a hydrogen or electron donor and becomes oxidized, while the oth…	KIAA4033; mKIAA4033	KIAA4033; mKIAA4033
3190239	-0.558305	6.30299	-3.5696	0.00560734	0.0205055	-4.22093	Mus musculus	RefSeq	ILMN_196165	ILMN_253387	NUP155	NM_133227.2	NM_133227.2	NA	170762	31559997	NM_133227.2	Nup155	NP_573490.2	ILMN_1235035	3190239	S	73	CCACGATTGCCGACATGCCATCGGTGCTGGGCTCTATGATGGTGGCCTCT	15	+	8059432-8059445:8059446-8059481	15qA1	Mus musculus nucleoporin 155 (Nup155), mRNA.	Any of the numerous similar discrete openings in the nuclear envelope of a eukaryotic cell, where the inner and outer nuclear membranes are joined [goid 5643] [evidence IEA]; A membrane-bounded organelle of eukaryotic cells in which chromosomes are housed and replicated. In most cells, the nucleus contains all of the cell's chromosomes except the organellar chromosomes, and is the site of RNA syn…	The directed movement of substances (such as macromolecules, small molecules, ions) into, out of, within or between cells, or within a multicellular organism [goid 6810] [evidence IEA]; The directed movement of proteins in a cell, from one side of a membrane to another [goid 65002] [evidence IEA]; The directed movement of proteins into, out of, within or between cells [goid 15031] [evidence IEA];…	The action of a molecule that contributes to the structural integrity of the nuclear pore complex [goid 17056] [evidence IEA]	D930027M19Rik; mKIAA0791	D930027M19Rik; mKIAA0791
1050333	0.512847	3.50236	3.56466	0.00565208	0.0206559	-4.22922	Mus musculus	RefSeq	ILMN_212346	ILMN_212346	KCNK4	NM_008431.2	NM_008431.2	NA	16528	141803210	NM_008431.2	Kcnk4	NP_032457.1	ILMN_1226370	1050333	S	50	CGTTGGGGCCCCAATCCCAGCCTGGAAGGTTGGACTTCACGTCGACCCTT	19	-	7008906-7008955	19qA	Mus musculus potassium channel, subfamily K, member 4 (Kcnk4), mRNA.	Double layer of lipid molecules that encloses all cells, and, in eukaryotes, many organelles; may be a single or double lipid bilayer; also includes associated proteins [goid 16020] [evidence IEA]; Penetrating at least one phospholipid bilayer of a membrane. May also refer to the state of being buried in the bilayer with no exposure outside the bilayer. When used to describe a protein, indicates …	The directed movement of substances (such as macromolecules, small molecules, ions) into, out of, within or between cells, or within a multicellular organism [goid 6810] [evidence IEA]; The directed movement of potassium ions (K+) into, out of, within or between cells [goid 6813] [evidence IEA]; The directed movement of charged atoms or small charged molecules into, out of, within or between cell…	Catalysis of facilitated diffusion of an ion (by an energy-independent process) by passage through a transmembrane aqueous pore or channel without evidence for a carrier-mediated mechanism [goid 5216] [evidence IEA]; Catalysis of facilitated diffusion of a potassium ion (by an energy-independent process) involving passage through a transmembrane aqueous pore or channel without evidence for a carr…	TRAAK; MGC144821; TRAAKt	TRAAK; MGC144821; TRAAKt
4390239	0.3046	7.89037	3.56361	0.00566164	0.0206834	-4.23098	Mus musculus	RefSeq	ILMN_219008	ILMN_219008	FCHO1	NM_028715.2	NM_028715.2	NA	74015	27754000	NM_028715.2	Fcho1	NP_082991.2	ILMN_2703023	4390239	S	2804	GCTCAGCCAACTCCTCCGTCCACAAGCAGGCCCTGGCCTTTAGTATTCTT	8	-	74232557-74232606	8qB3.3	Mus musculus FCH domain only 1 (Fcho1), mRNA.				3322402E17Rik; KIAA0290; N28152	3322402E17Rik; KIAA0290; N28152
430044	0.422756	7.90021	3.55952	0.00569901	0.0208081	-4.23784	Mus musculus	RefSeq	ILMN_220771	ILMN_220771	TEX2	NM_198292.3	NM_198292.3	NA	21763	51988885	NM_198292.3	Tex2	NP_938034.2	ILMN_1222132	430044	S	4769	CCCATTTGCCTGTCAAGAGCCCACATGCCTTGTTCATTGGTCTTTCTCTG	11	-	106363576-106363625	11qE1	Mus musculus testis expressed gene 2 (Tex2), mRNA.	Penetrating at least one phospholipid bilayer of a membrane. May also refer to the state of being buried in the bilayer with no exposure outside the bilayer. When used to describe a protein, indicates that all or part of the peptide sequence is embedded in the membrane [goid 16021] [evidence IEA]; Double layer of lipid molecules that encloses all cells, and, in eukaryotes, many organelles; may be…	Any process specifically pertinent to the functioning of integrated living units: cells, tissues, organs, and organisms. A process is a collection of molecular events with a defined beginning and end [goid 8150] [evidence ND ]	Elemental activities, such as catalysis or binding, describing the actions of a gene product at the molecular level. A given gene product may exhibit one or more molecular functions [goid 3674] [evidence ND ]	4930568E07Rik; Taz4; Def-5; AI553404	4930568E07Rik; Taz4; Def-5; AI553404
1850672	-0.802856	4.96403	-3.54906	0.00579568	0.021128	-4.25539	Mus musculus	RefSeq	ILMN_187359	ILMN_187359	V1RA2	NM_011684.2	NM_011684.2	NA	22297	110665735	NM_011684.2	V1ra2	NP_035814.2	ILMN_1249741	1850672	S	602	CCTCATTAAAACTCACCCAAAATATAGTAAAACTACCTGTAATGTTCCCG	6	-	89884241-89884290	6qD1	Mus musculus vomeronasal 1 receptor, A2 (V1ra2), mRNA.	Penetrating at least one phospholipid bilayer of a membrane. May also refer to the state of being buried in the bilayer with no exposure outside the bilayer. When used to describe a protein, indicates that all or part of the peptide sequence is embedded in the membrane [goid 16021] [evidence IEA]; Double layer of lipid molecules that encloses all cells, and, in eukaryotes, many organelles; may be…	The series of molecular signals generated as a consequence of a G-protein coupled receptor binding to its physiological ligand [goid 7186] [evidence IEA]; A change in state or activity of a cell or an organism (in terms of movement, secretion, enzyme production, gene expression, etc.) as a result of a pheromone stimulus [goid 19236] [evidence IEA]; The cascade of processes by which a signal inter…	A receptor that binds an extracellular ligand and transmits the signal to a heterotrimeric G-protein complex. These receptors are characteristically seven-transmembrane receptors and are made up of hetero- or homodimers [goid 4930] [evidence IEA]; Combining with an extracellular or intracellular messenger to initiate a change in cell activity [goid 4872] [evidence IEA]; Mediates the transfer of a…	V1r2; V1ra11; mV1R2; V1RA9	V1r2; V1ra11; mV1R2; V1RA9
3450167	0.233213	9.77943	3.54566	0.0058275	0.021238	-4.2611	Mus musculus	RefSeq	ILMN_210827	ILMN_210827	SNX10	NM_028035.3	NM_028035.3	NA	71982	142369538	NM_028035.3	Snx10	NP_082311.2	ILMN_2609614	3450167	S	2349	GCAGCTGTGTGTAGAGTTTCAGAGCAAGTTCCTCAGCAGTGTAGATGAAT	6	+	51540451-51540500	6qB3	Mus musculus sorting nexin 10 (Snx10), mRNA.		The directed movement of substances (such as macromolecules, small molecules, ions) into, out of, within or between cells, or within a multicellular organism [goid 6810] [evidence IEA]; Any process that mediates interactions between a cell and its surroundings. Encompasses interactions such as signaling or attachment between one cell and another cell, between a cell and an extracellular matrix, o…	Interacting selectively with any protein or protein complex (a complex of two or more proteins that may include other nonprotein molecules) [goid 5515] [evidence IEA]; Interacting selectively with any inositol-containing glycerophospholipid [goid 35091] [evidence IEA]	2410004M09Rik	2410004M09Rik
2940224	1.12692	5.50408	3.54499	0.00583381	0.021258	-4.26223	Mus musculus	RefSeq	ILMN_184408	ILMN_184408	ZFP316	NM_017467.2	NM_017467.2	NA	54201	49227201	NM_017467.2	Zfp316	NP_059495.2	ILMN_2435891	2940224	S	4157	CCTCTGCAAGCCTCTTCACACAGCCTCTGTAATCACCCTACACTAGGAGC	5	-	144013977-144014026	5qG2	Mus musculus zinc finger protein 316 (Zfp316), mRNA.	A membrane-bounded organelle of eukaryotic cells in which chromosomes are housed and replicated. In most cells, the nucleus contains all of the cell's chromosomes except the organellar chromosomes, and is the site of RNA synthesis and processing. In some species, or in specialized cell types, RNA metabolism or DNA replication may be absent [goid 5634] [evidence IEA]; The living contents of a cell…	Any process that modulates the frequency, rate or extent of DNA-dependent transcription [goid 6355] [evidence IEA]; The synthesis of either RNA on a template of DNA or DNA on a template of RNA [goid 6350] [evidence IEA]	Interacting selectively with zinc (Zn) ions [goid 8270] [evidence IEA]; Interacting selectively with DNA (deoxyribonucleic acid) [goid 3677] [evidence IEA]; Interacting selectively with any metal ion [goid 46872] [evidence IEA]; Interacting selectively with any nucleic acid [goid 3676] [evidence IEA]	MZF-3; Emzf1	MZF-3; Emzf1
3830605	0.952033	3.89139	3.53717	0.00590771	0.0214938	-4.27535	Mus musculus	RefSeq	ILMN_210284	ILMN_210284	CELSR3	NM_080437.2	NM_080437.2	NA	107934	125719164	NM_080437.2	Celsr3	NP_536685.2	ILMN_2604070	3830605	S	11412	AGTGTCCTTGCTATGTCCTAGGTTCTGTAGATGCCCGTCTCTGGGGTCCC	9	+	108755165-108755214	9qF2	Mus musculus cadherin, EGF LAG seven-pass G-type receptor 3 (flamingo homolog, Drosophila) (Celsr3), mRNA.	Penetrating at least one phospholipid bilayer of a membrane. May also refer to the state of being buried in the bilayer with no exposure outside the bilayer. When used to describe a protein, indicates that all or part of the peptide sequence is embedded in the membrane [goid 16021] [evidence IEA]; Double layer of lipid molecules that encloses all cells, and, in eukaryotes, many organelles; may be…	The biological process whose specific outcome is the progression of a multicellular organism over time from an initial condition (e.g. a zygote or a young adult) to a later condition (e.g. a multicellular animal or an aged adult) [goid 7275] [evidence IEA]; The cascade of processes by which a signal interacts with a receptor, causing a change in the level or activity of a second messenger or othe…	A receptor that binds an extracellular ligand and transmits the signal to a heterotrimeric G-protein complex. These receptors are characteristically seven-transmembrane receptors and are made up of hetero- or homodimers [goid 4930] [evidence IEA]; Interacting selectively with calcium ions (Ca2+) [goid 5509] [evidence IEA]; Mediates the transfer of a signal from the outside to the inside of a cell…	mKIAA0812	mKIAA0812
7150673	-1.31101	5.07952	-3.52423	0.00603214	0.0218969	-4.29708	Mus musculus	RefSeq	ILMN_192713	ILMN_248724	PBX4	NM_001024954.1	NM_001024954.1	NA	80720	68299790	NM_001024954.1	Pbx4	NP_001020125.1	ILMN_2677782	7150673	S	961	CACTGACCAATGGAAGTGACGTGGTTCTCACTCTGCGGACCCTGGCCTTC	8	+	72394495-72394544	8qB3.3	Mus musculus pre-B-cell leukemia homeobox 4 (Pbx4), mRNA.	A membrane-bounded organelle of eukaryotic cells in which chromosomes are housed and replicated. In most cells, the nucleus contains all of the cell's chromosomes except the organellar chromosomes, and is the site of RNA synthesis and processing. In some species, or in specialized cell types, RNA metabolism or DNA replication may be absent [goid 5634] [evidence IEA]; A structure found in a male m…	Any process that modulates the frequency, rate or extent of DNA-dependent transcription [goid 6355] [evidence IEA]; The synthesis of either RNA on a template of DNA or DNA on a template of RNA [goid 6350] [evidence IEA]; Any process that modulates the frequency, rate or extent of the synthesis of either RNA on a template of DNA or DNA on a template of RNA [goid 45449] [evidence IEA]; Any process …	Interacting selectively with DNA (deoxyribonucleic acid) [goid 3677] [evidence IEA]; Interacting selectively with DNA of a specific nucleotide composition, e.g. GC-rich DNA binding, or with a specific sequence motif or type of DNA e.g. promotor binding or rDNA binding [goid 43565] [evidence IEA]; The function of binding to a specific DNA sequence in order to modulate transcription. The transcript…	2410015M21Rik; AI429113; AW045266	2410015M21Rik; AI429113; AW045266
4830240	-1.00871	5.22453	-3.49482	0.00632534	0.0228579	-4.34652	Mus musculus	RefSeq	ILMN_217658	ILMN_217658	KLHL2	NM_178633.2	NM_178633.2	NA	77113	110347552	NM_178633.2	Klhl2	NP_848748.2	ILMN_2686047	4830240	S	2389	GTTGAGGGGTGAAACTGCTGGCTTTTATAAGTATCTTTGATTACATGACT	8	-	67218710-67218759	8qB3.1	Mus musculus kelch-like 2, Mayven (Drosophila) (Klhl2), mRNA.	All of the contents of a cell excluding the plasma membrane and nucleus, but including other subcellular structures [goid 5737] [evidence IEA]; Any of the various filamentous elements that form the internal framework of cells, and typically remain after treatment of the cells with mild detergent to remove membrane constituents and soluble components of the cytoplasm. The term embraces intermediat…		Interacting selectively with any protein or protein complex (a complex of two or more proteins that may include other nonprotein molecules) [goid 5515] [evidence IEA]; Interacting selectively with monomeric or multimeric forms of actin, including actin filaments [goid 3779] [evidence ISO]; Interacting selectively with an identical protein to form a homodimer [goid 42803] [evidence ISO]	Mav; AU020744; KIAA4249; ABP-KELCH; 6030411N21Rik; mKIAA4249	Mav; AU020744; KIAA4249; ABP-KELCH; 6030411N21Rik; mKIAA4249
830164	1.59455	5.64152	3.4884	0.00639132	0.0230606	-4.35732	Mus musculus	RefSeq	ILMN_212983	ILMN_212983	SUMF1	NM_145937.2	NM_145937.2	NA	58911	144094255	NM_145937.2	Sumf1	NP_666049.2	ILMN_2632276	830164	S	2508	CCAGAGAGATACGAGAAATCTGGTTGATTTTGCGATATCAGATGCTTTGA	6	-	108057057-108057106	6qE1	Mus musculus sulfatase modifying factor 1 (Sumf1), mRNA.	The irregular network of unit membranes, visible only by electron microscopy, that occurs in the cytoplasm of many eukaryotic cells. The membranes form a complex meshwork of tubular channels, which are often expanded into slitlike cavities called cisternae. The ER takes two forms, rough (or granular), with ribosomes adhering to the outer surface, and smooth (with no ribosomes attached) [goid 5783…	The process of removal or addition of one or more electrons with or without the concomitant removal or addition of a proton or protons [goid 55114] [evidence IEA]	Interacting selectively with any metal ion [goid 46872] [evidence IEA]; Interacting selectively with an identical protein to form a homodimer [goid 42803] [evidence IPI]; Interacting selectively with calcium ions (Ca2+) [goid 5509] [evidence IEA]; Catalysis of an oxidation-reduction (redox) reaction, a reversible chemical reaction in which the oxidation state of an atom or atoms within a molecule…	AI463102; AA543204; AI851573; FGE; MGC39076	AI463102; AA543204; AI851573; FGE; MGC39076
1990333	0.558477	8.74942	3.48432	0.00643362	0.0232035	-4.36419	Mus musculus	RefSeq	ILMN_212761	ILMN_230772	HDHD2	NM_001039202.1	NM_001039202.1	NA	76987	85861234	NM_001039202.1	Hdhd2	NP_001034291.1	ILMN_2629982	1990333	S	84	GGCAGCGCGCCGTGCGTTAAAAGCTGTTTTGGTGGATCTCAATGGCACAC	18	+	77189864-77189913	18qE3	Mus musculus haloacid dehalogenase-like hydrolase domain containing 2 (Hdhd2), transcript variant 3, mRNA.		The chemical reactions and pathways, including anabolism and catabolism, by which living organisms transform chemical substances. Metabolic processes typically transform small molecules, but also include macromolecular processes such as DNA repair and replication, and protein synthesis and degradation [goid 8152] [evidence IEA]	Catalysis of a biochemical reaction at physiological temperatures. In biologically catalyzed reactions, the reactants are known as substrates, and the catalysts are naturally occurring macromolecular substances known as enzymes. Enzymes possess specific binding sites for substrates, and are usually composed wholly or largely of protein, but RNA that has catalytic activity (ribozyme) is often also…	3110052N05Rik; 0610039H12Rik	3110052N05Rik; 0610039H12Rik
2120368	-0.352835	7.49474	-3.48029	0.00647561	0.0233353	-4.37096	Mus musculus	RefSeq	ILMN_217686	ILMN_217686	GNA12	NM_010302.2	NM_010302.2	NA	14673	118129987	NM_010302.2	Gna12	NP_034432.1	ILMN_2686393	2120368	S	1581	GACACAGTTAACCAAGGTTCAGGTGTACGCAGACACACGCGTGCTCTCAT	5	-	141236147-141236196	5qG2	Mus musculus guanine nucleotide binding protein, alpha 12 (Gna12), mRNA.	Double layer of lipid molecules that encloses all cells, and, in eukaryotes, many organelles; may be a single or double lipid bilayer; also includes associated proteins [goid 16020] [evidence IEA]; Any of a family of heterotrimeric GTP-binding and hydrolyzing proteins; they belong to a superfamily of GTPases that includes monomeric proteins such as EF-Tu and RAS. Heterotrimeric G-proteins consist…	The cascade of processes by which a signal interacts with a receptor, causing a change in the level or activity of a second messenger or other downstream target, and ultimately effecting a change in the functioning of the cell [goid 7165] [evidence IEA]; The process whereby relatively unspecialized cells, e.g. embryonic or regenerative cells, acquire specialized structural and/or functional featu…	Interacting selectively with GTP, guanosine triphosphate [goid 5525] [evidence IEA]; Mediates the transfer of a signal from the outside to the inside of a cell by means other than the introduction of the signal molecule itself into the cell [goid 4871] [evidence IEA]; Interacting selectively with a nucleotide, any compound consisting of a nucleoside that is esterified with (ortho)phosphate or an …	AI414047; Galpha12; AI504261; MGC130498	AI414047; Galpha12; AI504261; MGC130498
6290014	0.550572	3.60788	3.47855	0.00649391	0.0233946	-4.3739	Mus musculus	RefSeq	ILMN_185202	ILMN_249746	PHLDA2	NM_009434.2	NM_009434.2	NA	22113	57863299	NM_009434.2	Phlda2	NP_033460.1	ILMN_2425029	6290014	S	550	GGTGACGCCGCCGCTGCTCTTCACCGAAGATATTCCCGTGCTTGCTGAGC	7	-	150687590-150687639	7qF5	Mus musculus pleckstrin homology-like domain, family A, member 2 (Phlda2), mRNA.	All of the contents of a cell excluding the plasma membrane and nucleus, but including other subcellular structures [goid 5737] [evidence TAS]	Morphogenesis of an organ. An organ is defined as a tissue or set of tissues that work together to perform a specific function or functions. Morphogenesis is the process by which anatomical structures are generated and organized. Organs are commonly observed as visibly distinct structures, but may also exist as loosely associated clusters of cells that work together to perform a specific function…		Tssc3; Ipl	Tssc3; Ipl
7550575	1.3081	4.29151	3.47751	0.00650479	0.0234305	-4.37564	Mus musculus	RefSeq	ILMN_214850	ILMN_214850	HSD3B2	NM_153193.2	NM_153193.2	NA	15493	31542968	NM_153193.2	Hsd3b2	NP_694873.1	ILMN_1234480	7550575	S	3498	GGCCTAGCCGGCCATCACTGGAAAGAGATGCCCATTGGACATGCAAACTG	3	-	98513325-98513374	3qF2.2	Mus musculus hydroxy-delta-5-steroid dehydrogenase, 3 beta- and steroid delta-isomerase 2 (Hsd3b2), mRNA.	The irregular network of unit membranes, visible only by electron microscopy, that occurs in the cytoplasm of many eukaryotic cells. The membranes form a complex meshwork of tubular channels, which are often expanded into slitlike cavities called cisternae. The ER takes two forms, rough (or granular), with ribosomes adhering to the outer surface, and smooth (with no ribosomes attached) [goid 5783…	The chemical reactions and pathways resulting in the formation of C21-steroid hormones, steroid compounds containing 21 carbons which function as hormones [goid 6700] [evidence IEA]; The process of removal or addition of one or more electrons with or without the concomitant removal or addition of a proton or protons [goid 55114] [evidence IEA]; The chemical reactions and pathways resulting in the…	Catalysis of a biochemical reaction at physiological temperatures. In biologically catalyzed reactions, the reactants are known as substrates, and the catalysts are naturally occurring macromolecular substances known as enzymes. Enzymes possess specific binding sites for substrates, and are usually composed wholly or largely of protein, but RNA that has catalytic activity (ribozyme) is often also…
6280612	0.413415	8.75825	3.47636	0.00651691	0.0234676	-4.37758	Mus musculus	RefSeq	ILMN_210357	ILMN_210357	ATP5E	NM_025983.3	NM_025983.3	NA	67126	114158704	NM_025983.3	Atp5e	NP_080259.1	ILMN_2604794	6280612	S	203	CGAACGCTGAGAAGACTTCGGGCAGCAGCATAAAAATTGTGAAAGTCTCG	2	-	174288015-174288064	2qH4	Mus musculus ATP synthase, H+ transporting, mitochondrial F1 complex, epsilon subunit (Atp5e), nuclear gene encoding mitochondrial protein, mRNA.	The sector of a hydrogen-transporting ATP synthase complex in which the catalytic activity resides; it comprises the catalytic core and central stalk, and is peripherally associated with a membrane, such as the plasma membrane or the mitochondrial inner membrane, when the entire ATP synthase is assembled [goid 45261] [evidence IEA]; Double layer of lipid molecules that encloses all cells, and, in…	The directed movement of protons (hydrogen ions) into, out of, within or between cells [goid 15992] [evidence IEA]; The directed movement of charged atoms or small charged molecules into, out of, within or between cells [goid 6811] [evidence IEA]; The directed movement of substances (such as macromolecules, small molecules, ions) into, out of, within or between cells, or within a multicellular or…	Catalysis of the hydrolysis of various bonds, e.g. C-O, C-N, C-C, phosphoric anhydride bonds, etc. Hydrolase is the systematic name for any enzyme of EC class 3 [goid 16787] [evidence IEA]; Interacting selectively with any metal ion [goid 46872] [evidence IEA]; Catalysis of the transfer of hydrogen ions from one side of a membrane to the other [goid 15078] [evidence IEA]; Catalysis of the transfe…	2410043G19Rik; ATPE; AV000645	2410043G19Rik; ATPE; AV000645
5310427	-0.838915	5.71213	-3.47568	0.00652411	0.0234903	-4.37872	Mus musculus	RefSeq	ILMN_218746	ILMN_218746	MTA1	NM_054081.2	NM_054081.2	NA	116870	91598895	NM_054081.2	Mta1	NP_473422.2	ILMN_1225235	5310427	S	2175	CTGCCGCTGCGGCCACCCCCACCTGCACCAGTCAATGATGAGCCCATTGT	12	+	114361429-114361445:114361329-114361361	12qF1	Mus musculus metastasis associated 1 (Mta1), mRNA.	A membrane-bounded organelle of eukaryotic cells in which chromosomes are housed and replicated. In most cells, the nucleus contains all of the cell's chromosomes except the organellar chromosomes, and is the site of RNA synthesis and processing. In some species, or in specialized cell types, RNA metabolism or DNA replication may be absent [goid 5634] [evidence IDA]; All of the contents of a cell…	Any process that modulates the frequency, rate or extent of DNA-dependent transcription [goid 6355] [evidence IEA]	Interacting selectively with any metal ion [goid 46872] [evidence IEA]; Interacting selectively with zinc (Zn) ions [goid 8270] [evidence IEA]; Interacting selectively with DNA (deoxyribonucleic acid) [goid 3677] [evidence IEA]; Interacting selectively with DNA of a specific nucleotide composition, e.g. GC-rich DNA binding, or with a specific sequence motif or type of DNA e.g. promotor binding or…	MGC118456	MGC118456
3440465	0.563066	6.84282	3.46527	0.0066349	0.0238324	-4.39624	Mus musculus	RefSeq	ILMN_211761	ILMN_211761	RABEP1	NM_019400.1	NM_019400.1	NA	54189	9507020	NM_019400.1	Rabep1	NP_062273.1	ILMN_2619286	3440465	S	2582	CCGGGCTATTCTGAATGATACCAAACTGACAGACATTAACCAGCTCCCTG	11	+	70731108-70731157	11qB3-qB4	Mus musculus rabaptin, RAB GTPase binding effector protein 1 (Rabep1), mRNA.	All of the contents of a cell excluding the plasma membrane and nucleus, but including other subcellular structures [goid 5737] [evidence IEA]; A membrane-bounded organelle that carries materials newly ingested by endocytosis. It passes many of the materials to lysosomes for degradation [goid 5768] [evidence IDA]	A form of programmed cell death induced by external or internal signals that trigger the activity of proteolytic caspases, whose actions dismantle the cell and result in cell death. Apoptosis begins internally with condensation and subsequent fragmentation of the cell nucleus (blebbing) while the plasma membrane remains intact. Other characteristics of apoptosis include DNA fragmentation and the …	Increases the activity of a GTPase, an enzyme that catalyzes the hydrolysis of GTP [goid 5096] [evidence IEA]; The function that stimulates a cell to grow or proliferate. Most growth factors have other actions besides the induction of cell growth or proliferation [goid 8083] [evidence IEA]	AV213537; MGC150053; AW240603; AI481320; MGC150054; AA409789; Rab5ep	AV213537; MGC150053; AW240603; AI481320; MGC150054; AA409789; Rab5ep
5560692	-0.35392	8.6312	-3.46317	0.00665756	0.0239071	-4.39979	Mus musculus	RefSeq	ILMN_222633	ILMN_222633	PAIP1	NM_145457.3	NM_145457.3	NA	218693	119943134	NM_145457.3	Paip1	NP_663432.1	ILMN_2752569	5560692	S	878	CAGGTTGGTCTTCGGGAACTGCTGAATGCTCTGTTTTCTAATCCTATGGA	13	+	120236564-120236613	13qD2.3	Mus musculus polyadenylate binding protein-interacting protein 1 (Paip1), transcript variant 1, mRNA.	All of the contents of a cell excluding the plasma membrane and nucleus, but including other subcellular structures [goid 5737] [evidence IEA]; The part of a cell or its extracellular environment in which a gene product is located. A gene product may be located in one or more parts of a cell and its location may be as specific as a particular macromolecular complex, that is, a stable, persistent …	Any process specifically pertinent to the functioning of integrated living units: cells, tissues, organs, and organisms. A process is a collection of molecular events with a defined beginning and end [goid 8150] [evidence ND ]; Any process that modulates the frequency, rate or extent of the chemical reactions and pathways resulting in the formation of proteins by the translation of mRNA [goid 641…	Interacting selectively with any protein or protein complex (a complex of two or more proteins that may include other nonprotein molecules) [goid 5515] [evidence IEA]; Elemental activities, such as catalysis or binding, describing the actions of a gene product at the molecular level. A given gene product may exhibit one or more molecular functions [goid 3674] [evidence ND ]
4010673	-1.01214	4.84522	-3.45987	0.00669321	0.0240251	-4.40535	Mus musculus	RefSeq	ILMN_220755	ILMN_220755	NQO1	NM_008706.4	NM_008706.4	NA	18104	153791748	NM_008706.4	Nqo1	NP_032732.3	ILMN_2726371	4010673	S	571	CTATCACCACTGGGGGTAGCGGCTCCATGTACTCTCTTCAGGGTGTCCAC				8qD3	Mus musculus NAD(P)H dehydrogenase, quinone 1 (Nqo1), mRNA.	All of the contents of a cell excluding the plasma membrane and nucleus, but including other subcellular structures [goid 5737] [evidence IEA]	The process of removal or addition of one or more electrons with or without the concomitant removal or addition of a proton or protons [goid 55114] [evidence IEA]; Any process that stops or reduces the activity of an enzyme [goid 43086] [evidence IDA]; A change in state or activity of a cell or an organism (in terms of movement, secretion, enzyme production, gene expression, etc.) as a result of …	Catalysis of an oxidation-reduction (redox) reaction, a reversible chemical reaction in which the oxidation state of an atom or atoms within a molecule is altered. One substrate acts as a hydrogen or electron donor and becomes oxidized, while the other acts as hydrogen or electron acceptor and becomes reduced [goid 16491] [evidence IEA]; Interacting selectively with a coenzyme, any of various non…	Dia4; Ox-1; Nmo-1; Nmor1; NMO1; Ox1; AV001255; QR1	Dia4; Ox-1; Nmo-1; Nmor1; NMO1; Ox1; AV001255; QR1
4730392	-0.325385	9.51706	-3.44991	0.00680203	0.0243748	-4.42212	Mus musculus	RefSeq	ILMN_220815	ILMN_220815	SWAP70	NM_009302.2	NM_009302.2	NA	20947	40789274	NM_009302.2	Swap70	NP_033328.2	ILMN_2765524	4730392	S	3679	TTCACTGTAATCAGCCCTTTCCTCCAACGAGAGATGAGATTATTTGCAGG	7	+	117426722-117426771	7qF1	Mus musculus SWA-70 protein (Swap70), mRNA.	All of the contents of a cell excluding the plasma membrane and nucleus, but including other subcellular structures [goid 5737] [evidence IEA]; Double layer of lipid molecules that encloses all cells, and, in eukaryotes, many organelles; may be a single or double lipid bilayer; also includes associated proteins [goid 16020] [evidence IEA]; A membrane-bounded organelle of eukaryotic cells in which…	Recombination occurring within or between DNA molecules in somatic cells [goid 16444] [evidence IDA]; The switching of activated B cells from IgM biosynthesis to biosynthesis of other isotypes of immunoglobulin, accomplished through a recombination process involving an intrachromosomal deletion involving switch regions that reside 5' of each constant region gene segment in the immunoglobulin heav…	Interacting selectively with any protein or protein complex (a complex of two or more proteins that may include other nonprotein molecules) [goid 5515] [evidence IPI]; Interacting selectively with DNA (deoxyribonucleic acid) [goid 3677] [evidence IDA]; Interacting selectively with ATP, adenosine 5'-triphosphate, a universally important coenzyme and enzyme regulator [goid 5524] [evidence IDA]	AV235546; 70kDa	AV235546; 70kDa
2600541	0.35915	8.46702	3.43756	0.00693955	0.0248108	-4.44292	Mus musculus	RefSeq	ILMN_221369	ILMN_221369	HAGH	NM_024284.1	NM_024284.1	NA	14651	21729785	NM_024284.1	Hagh	NP_077246.1	ILMN_2734661	2600541	S	816	AGCCCACGGTGCCATCCACCCTGGCAGAAGAGTTCACCTACAACCCCTTC	17	+	25000641-25000690	17qA3.3	Mus musculus hydroxyacyl glutathione hydrolase (Hagh), mRNA.			Catalysis of the hydrolysis of various bonds, e.g. C-O, C-N, C-C, phosphoric anhydride bonds, etc. Hydrolase is the systematic name for any enzyme of EC class 3 [goid 16787] [evidence IEA]; Interacting selectively with any metal ion [goid 46872] [evidence IEA]; Interacting selectively with zinc (Zn) ions [goid 8270] [evidence IEA]; Catalysis of the reaction: (S)-(2-hydroxyacyl)glutathione + H2O =…	Glo-2; Rsp29; BC019817; Glo2	BC019817; Glo2; Glo-2; Rsp29
3890167	0.500957	6.6542	3.43397	0.00698011	0.0249468	-4.44898	Mus musculus	RefSeq	ILMN_217635	ILMN_217635	RGS9BP	NM_145840.3	NM_145840.3	NA	243923	148539898	NM_145840.3	Rgs9bp	NP_665839.1	ILMN_1237501	3890167	S	6405	GAGTTGAGTGTTGCTTGCGTGGCTATGGATGTATTAGGTGTGTGGAAGCG				7qB2	Mus musculus regulator of G-protein signalling 9 binding protein (Rgs9bp), mRNA.	Double layer of lipid molecules that encloses all cells, and, in eukaryotes, many organelles; may be a single or double lipid bilayer; also includes associated proteins [goid 16020] [evidence IEA]; Penetrating at least one phospholipid bilayer of a membrane. May also refer to the state of being buried in the bilayer with no exposure outside the bilayer. When used to describe a protein, indicates …	A change in state or activity of a cell or an organism (in terms of movement, secretion, enzyme production, gene expression, etc.) as a result of a stimulus [goid 50896] [evidence IEA]; The series of events required for an organism to receive a visual stimulus, convert it to a molecular signal, and recognize and characterize the signal. Visual stimuli are detected in the form of photons and are p…		Rgs9-1bp; R9AP	Rgs9-1bp; R9AP
3130706	-0.828593	3.80416	-3.43067	0.00701752	0.0250666	-4.45454	Mus musculus	RefSeq	ILMN_216644	ILMN_216644	ACSS2	NM_019811.3	NM_019811.3	NA	60525	133892533	NM_019811.3	Acss2	NP_062785.2	ILMN_1231116	3130706	S	164	GAGGTCAGACGCTCGGCGCACGTCCCCTCTCTGCAGCGCTACCGCGAGCT	2	+	155343942-155343991	2qH1	Mus musculus acyl-CoA synthetase short-chain family member 2 (Acss2), mRNA.	All of the contents of a cell excluding the plasma membrane and nucleus, but including other subcellular structures [goid 5737] [evidence IDA]	The chemical reactions and pathways resulting in the formation of acetyl-CoA, a derivative of coenzyme A in which the sulfhydryl group is acetylated [goid 6085] [evidence IDA]; The chemical reactions and pathways, including anabolism and catabolism, by which living organisms transform chemical substances. Metabolic processes typically transform small molecules, but also include macromolecular pro…	Catalysis of the ligation of two substances with concomitant breaking of a diphosphate linkage, usually in a nucleoside triphosphate. Ligase is the systematic name for any enzyme of EC class 6 [goid 16874] [evidence IEA]; Catalysis of the reaction: ATP + acetate + CoA = AMP + diphosphate + acetyl-CoA [goid 3987] [evidence IDA]; Interacting selectively with AMP, adenosine monophosphate [goid 16208…	AceCS1; 1110017C11Rik; ACAS; Acs1; Acas2; Acas1	AceCS1; 1110017C11Rik; ACAS; Acs1; Acas2; Acas1
1850372	0.799533	6.20239	3.42666	0.00706337	0.0252164	-4.4613	Mus musculus	RefSeq	ILMN_220998	ILMN_220998	B3GAT3	NM_024256.2	NM_024256.2	NA	72727	31980750	NM_024256.2	B3gat3	NP_077218.1	ILMN_2729706	1850372	S	1032	CCACCTTGTAGATCCCAAGGACCTGGAGCCACGGGCTGCCAATTGTACTC	19	+	9000811-9000860	19qA	Mus musculus beta-1,3-glucuronyltransferase 3 (glucuronosyltransferase I) (B3gat3), mRNA.	A compound membranous cytoplasmic organelle of eukaryotic cells, consisting of flattened, ribosome-free vesicles arranged in a more or less regular stack. The Golgi apparatus differs from the endoplasmic reticulum in often having slightly thicker membranes, appearing in sections as a characteristic shallow semicircle so that the convex side (cis or entry face) abuts the endoplasmic reticulum, sec…		Interacting selectively with manganese (Mn) ions [goid 30145] [evidence IEA]; Catalysis of the transfer of a group, e.g. a methyl group, glycosyl group, acyl group, phosphorus-containing, or other groups, from one compound (generally regarded as the donor) to another compound (generally regarded as the acceptor). Transferase is the systematic name for any enzyme of EC class 2 [goid 16740] [eviden…	2810405M13Rik	2810405M13Rik
4830259	-0.924643	3.73194	-3.42197	0.00711727	0.0253876	-4.4692	Mus musculus	RefSeq	ILMN_208742	ILMN_208742	LRRC10	NM_146242.2	NM_146242.2	NA	237560	113930741	NM_146242.2	Lrrc10	NP_666354.1	ILMN_2589073	4830259	S	1172	ACCAAAGAACAAGACCAGCCACAGCACTCTTCCACCACGCAGGAGTAGCT	10	+	116483568-116483617	10qD2	Mus musculus leucine rich repeat containing 10 (Lrrc10), mRNA.	A membrane-bounded organelle of eukaryotic cells in which chromosomes are housed and replicated. In most cells, the nucleus contains all of the cell's chromosomes except the organellar chromosomes, and is the site of RNA synthesis and processing. In some species, or in specialized cell types, RNA metabolism or DNA replication may be absent [goid 5634] [evidence IDA]; Any of the various filamentou…		Interacting selectively with any protein or protein complex (a complex of two or more proteins that may include other nonprotein molecules) [goid 5515] [evidence IEA]	Serdin1; MGC107614; D330003I11Rik; Hrlrrp	Serdin1; MGC107614; D330003I11Rik; Hrlrrp
5130349	-0.474267	8.66621	-3.41662	0.00717941	0.0255702	-4.47823	Mus musculus	RefSeq	ILMN_212967	ILMN_235331	ATXN10	NM_016843.3	NM_016843.3	NA	54138	142376666	NM_016843.3	Atxn10	NP_058539.2	ILMN_2771326	5130349	S	1459	AAGAGTGGGGATAAACTGATTCTGAAGTCTAATAATGACATCCCCCCGCC	15	+	85292847-85292896	15qE2	Mus musculus ataxin 10 (Atxn10), mRNA.	The part of a cell or its extracellular environment in which a gene product is located. A gene product may be located in one or more parts of a cell and its location may be as specific as a particular macromolecular complex, that is, a stable, persistent association of macromolecules that function together [goid 5575] [evidence ND ]	Any process specifically pertinent to the functioning of integrated living units: cells, tissues, organs, and organisms. A process is a collection of molecular events with a defined beginning and end [goid 8150] [evidence ND ]	Elemental activities, such as catalysis or binding, describing the actions of a gene product at the molecular level. A given gene product may exhibit one or more molecular functions [goid 3674] [evidence ND ]	AI325283; Tex169; TEG-169; Sca10; C77170; E46	AI325283; Tex169; TEG-169; Sca10; C77170; E46
1240482	-0.858912	3.68818	-3.40953	0.00726252	0.0258269	-4.49018	Mus musculus	RefSeq	ILMN_220393	ILMN_319859	TTLL9	NM_001083618.1	NM_001083618.1	NA	74711	134288893	NM_001083618.1	Ttll9	NP_001077087.1	ILMN_2721452	1240482	S	1185	GAACTCAAGACCTGTCTGCTGGAGGATACCCTGCACGTGGTGGACATGGA	2	+	152828038-152828087	2qH1	Mus musculus tubulin tyrosine ligase-like family, member 9 (Ttll9), transcript variant 1, mRNA.	All of the contents of a cell excluding the plasma membrane and nucleus, but including other subcellular structures [goid 5737] [evidence IEA]; Any of the various filamentous elements that form the internal framework of cells, and typically remain after treatment of the cells with mild detergent to remove membrane constituents and soluble components of the cytoplasm. The term embraces intermediat…	The covalent alteration of one or more amino acids occurring in proteins, peptides and nascent polypeptides (co-translational, post-translational modifications). Includes the modification of charged tRNAs that are destined to occur in a protein (pre-translation modification) [goid 6464] [evidence IEA]	Catalysis of the ligation of two substances with concomitant breaking of a diphosphate linkage, usually in a nucleoside triphosphate. Ligase is the systematic name for any enzyme of EC class 6 [goid 16874] [evidence IEA]; Catalysis of the reaction: ATP + detyrosinated alpha-tubulin + L-tyrosine = alpha-tubulin + ADP + phosphate [goid 4835] [evidence IEA]	AW046572; 1700016F23Rik; 4930509O20Rik	AW046572; 1700016F23Rik; 4930509O20Rik
1500608	0.284515	10.5273	3.38783	0.00752332	0.0266731	-4.52681	Mus musculus	RefSeq	ILMN_214346	ILMN_214346	ATP6V1D	NM_023721.2	NM_023721.2	NA	73834	80861456	NM_023721.2	Atp6v1d	NP_076210.1	ILMN_2647048	1500608	S	1194	GTACTATAAACATTCATGGTCGCAGGCAAAGGCTGTGAGCAACCTTCCTT	12	-	79944135-79944184	12qC3	Mus musculus ATPase, H+ transporting, lysosomal V1 subunit D (Atp6v1d), mRNA.	A large protein complex that catalyzes the synthesis or hydrolysis of ATP by a rotational mechanism, coupled to the transport of protons across a membrane. The complex comprises a membrane sector (F0, V0, or A0) that carries out proton transport and a cytoplasmic compartment sector (F1, V1, or A1) that catalyzes ATP synthesis or hydrolysis. Two major types have been characterized: V-type ATPases …	The directed movement of charged atoms or small charged molecules into, out of, within or between cells [goid 6811] [evidence IEA]; The directed movement of substances (such as macromolecules, small molecules, ions) into, out of, within or between cells, or within a multicellular organism [goid 6810] [evidence IEA]; The directed movement of protons (hydrogen ions) into, out of, within or between …	Catalysis of the hydrolysis of various bonds, e.g. C-O, C-N, C-C, phosphoric anhydride bonds, etc. Hydrolase is the systematic name for any enzyme of EC class 3 [goid 16787] [evidence IEA]; Catalysis of the transfer of hydrogen ions from one side of a membrane to the other [goid 15078] [evidence IEA]; Catalysis of the reaction: ATP + H2O = ADP + phosphate to directly drive the active transport of…	Atp6m; VATD; Vma8; 1110004P10Rik	Atp6m; VATD; Vma8; 1110004P10Rik
2630438	1.25066	5.59009	3.38506	0.00755725	0.0267786	-4.53148	Mus musculus	RefSeq	ILMN_212013	ILMN_212013	POLM	NM_017401.1	NM_017401.1	NA	54125	8394000	NM_017401.1	Polm	NP_059097.1	ILMN_2621761	2630438	S	1997	AAGCAGCTCATCTCCAGAATCGGCCCCACATGTGTCCTCTCTCTGTAGCT	11	-	5728485-5728534	11qA1	Mus musculus polymerase (DNA directed), mu (Polm), mRNA.	A membrane-bounded organelle of eukaryotic cells in which chromosomes are housed and replicated. In most cells, the nucleus contains all of the cell's chromosomes except the organellar chromosomes, and is the site of RNA synthesis and processing. In some species, or in specialized cell types, RNA metabolism or DNA replication may be absent [goid 5634] [evidence IEA]; The living contents of a cell…	The process whereby new strands of DNA are synthesized. The template for replication can either be an existing DNA molecule or RNA [goid 6260] [evidence IEA]; The process whereby a precursor cell type acquires the specialized features of a B cell [goid 30183] [evidence IMP]; Mutations occurring somatically that result in amino acid changes in the rearranged V regions of immunoglobulins [goid 1644…	Interacting selectively with any metal ion [goid 46872] [evidence IEA]; Catalysis of the transfer of a nucleotidyl group to a reactant [goid 16779] [evidence IEA]; Catalysis of the reaction: deoxynucleoside triphosphate + DNA(n) = diphosphate + DNA(n+1) [goid 3912] [evidence IEA]; Catalysis of the reaction: deoxynucleoside triphosphate + DNA(n) = diphosphate + DNA(n+1); the synthesis of DNA from …	AI462166; Tdt-N; B230309I03Rik	AI462166; Tdt-N; B230309I03Rik
1850082	-0.233805	9.43792	-3.37924	0.00762918	0.0270074	-4.5413	Mus musculus	RefSeq	ILMN_213592	ILMN_213592	CSRNP2	NM_153407.2	NM_153407.2	NA	207785	118130114	NM_153407.2	Csrnp2	NP_700456.1	ILMN_2638721	1850082	S	3983	GCACACAGGTTGGACTCTCAATGTGAACCCAAAGCTTGTCTGGCTCTCTG	15	-	100310094-100310143	15qF1	Mus musculus cysteine-serine-rich nuclear protein 2 (Csrnp2), mRNA.	A membrane-bounded organelle of eukaryotic cells in which chromosomes are housed and replicated. In most cells, the nucleus contains all of the cell's chromosomes except the organellar chromosomes, and is the site of RNA synthesis and processing. In some species, or in specialized cell types, RNA metabolism or DNA replication may be absent [goid 5634] [evidence IDA]	Any process that modulates the frequency, rate or extent of DNA-dependent transcription [goid 6355] [evidence IEA]; A form of programmed cell death induced by external or internal signals that trigger the activity of proteolytic caspases, whose actions dismantle the cell and result in cell death. Apoptosis begins internally with condensation and subsequent fragmentation of the cell nucleus (blebb…	The function of binding to a specific DNA sequence in order to modulate transcription. The transcription factor may or may not also interact selectively with a protein or macromolecular complex [goid 3700] [evidence IDA]; Interacting selectively with DNA (deoxyribonucleic acid) [goid 3677] [evidence IEA]	MGC28165; taip-12	MGC28165; taip-12
1030296	0.443239	7.10929	3.37897	0.00763249	0.0270117	-4.54175	Mus musculus	RefSeq	ILMN_210537	ILMN_210537	HBS1L	NM_019702.2	NM_019702.2	NA	56422	110611221	NM_019702.2	Hbs1l	NP_062676.2	ILMN_2776391	1030296	S	2381	CCAGAGGCCAGCACTGAACTGCCATTTCTTCCCTTTCGGGGTGGCAGTAA	10	+	21088283-21088332	10qA3	Mus musculus Hbs1-like (S. cerevisiae) (Hbs1l), transcript variant 1, mRNA.		The chemical reactions and pathways resulting in the formation of a protein. This is a ribosome-mediated process in which the information in messenger RNA (mRNA) is used to specify the sequence of amino acids in the protein [goid 6412] [evidence IEA]	Functions in chain elongation during polypeptide synthesis at the ribosome [goid 3746] [evidence IEA]; Interacting selectively with a nucleotide, any compound consisting of a nucleoside that is esterified with (ortho)phosphate or an oligophosphate at any hydroxyl group on the ribose or deoxyribose moiety [goid 166] [evidence IEA]; Catalysis of the reaction: GTP + H2O = GDP + phosphate [goid 3924]…	2810035F15Rik; AI326327; eRFS	2810035F15Rik; AI326327; eRFS
1070091	0.437658	5.00461	3.35576	0.00792656	0.0279754	-4.58096	Mus musculus	RefSeq	ILMN_217353	ILMN_217353	GMFG	NM_022024.2	NM_022024.2	NA	63986	85861214	NM_022024.2	Gmfg	NP_071307.1	ILMN_1227907	1070091	S	330	GTGGTCTACAGCTACAAGTACGTGCATGATGACGGCAGGGTGTCCTATCC	7	+	29229876-29229925	7qA3	Mus musculus glia maturation factor, gamma (Gmfg), transcript variant 1, mRNA.	The living contents of a cell; the matter contained within (but not including) the plasma membrane, usually taken to exclude large vacuoles and masses of secretory or ingested material. In eukaryotes it includes the nucleus and cytoplasm [goid 5622] [evidence IEA]		The function that stimulates a cell to grow or proliferate. Most growth factors have other actions besides the induction of cell growth or proliferation [goid 8083] [evidence IEA]; Interacting selectively with monomeric or multimeric forms of actin, including actin filaments [goid 3779] [evidence IEA]	AI324845; 0610039G16Rik; 2310057N07Rik	AI324845; 0610039G16Rik; 2310057N07Rik
2350195	-0.997754	5.2089	-3.35442	0.00794397	0.028033	-4.58323	Mus musculus	RefSeq	ILMN_211831	ILMN_239134	CLINT1	NM_001045520.3	NM_001045520.3	NA	216705	154240729	NM_001045520.3	Clint1	NP_001038985.2	ILMN_1235782	2350195	S	3035	GAGTGTGTAATACCGCATTAGCAATATGGTTCCAATAGAAGTTCGATATA				11qB1.1	Mus musculus clathrin interactor 1 (Clint1), mRNA.	All of the contents of a cell excluding the plasma membrane and nucleus, but including other subcellular structures [goid 5737] [evidence IEA]; A vesicle formed of membrane or protein, found in the cytoplasm of a cell [goid 31410] [evidence IEA]; Double layer of lipid molecules that encloses all cells, and, in eukaryotes, many organelles; may be a single or double lipid bilayer; also includes ass…	A type of vesicle-mediated transport in which cells take up external materials or membrane constituents by the invagination of small region of the plasma membrane to form a new membrane-bounded vesicle [goid 6897] [evidence IEA]	Interacting selectively with any protein or protein complex (a complex of two or more proteins that may include other nonprotein molecules) [goid 5515] [evidence ISO]; Interacting selectively with a lipid [goid 8289] [evidence IEA]	mKIAA0171; KIAA0171; AI642036; Enth; F630206G17Rik; C530049I24Rik; Epn4; RP23-298M7.4; AW537616	mKIAA0171; KIAA0171; AI642036; Enth; F630206G17Rik; C530049I24Rik; Epn4; RP23-298M7.4; AW537616
3130619	-0.652959	5.94675	-3.33734	0.0081683	0.028789	-4.61209	Mus musculus	RefSeq	ILMN_220374	ILMN_220374	PCNT	NM_008787.3	NM_008787.3	NA	18541	93004084	NM_008787.3	Pcnt	NP_032813.3	ILMN_2721221	3130619	S	9181	AGCTTCCACCTCCACACACTGCTACATAGAGGGAGCCCGCTGCTCTCATC	10	-	75855747-75855784:75858705-75858716	10qC1	Mus musculus pericentrin (kendrin) (Pcnt), transcript variant 1, mRNA.	Any of the long, generally straight, hollow tubes of internal diameter 12-15 nm and external diameter 24 nm found in a wide variety of eukaryotic cells; each consists (usually) of 13 protofilaments of polymeric tubulin, staggered in such a manner that the tubulin monomers are arranged in a helical pattern on the microtubular surface, and with the alpha/beta axes of the tubulin subunits parallel t…	A process that is carried out at the cellular level which results in the formation, arrangement of constituent parts, or disassembly of the spindle, the array of microtubules and associated molecules that forms between opposite poles of a eukaryotic cell during DNA segregation and serves to move the duplicated chromosomes apart [goid 7051] [evidence IDA]; The assembly of a cilium, a specialized e…		kendrin; C86676; AW476095; KEN; Pcnt2	kendrin; C86676; AW476095; KEN; Pcnt2
6770719	0.198212	10.3551	3.33285	0.00822841	0.028981	-4.61968	Mus musculus	RefSeq	ILMN_185813	ILMN_246039	TMEM2	NM_001033759.1	NM_001033759.1	NA	83921	76253921	NM_001033759.1	Tmem2	NP_001028931.1	ILMN_2430220	6770719	S	4982	TGCTCAGTCCTGCGCTAACTCCAGTCGCTGCCCTGTTCAGTGATGTCTGG	19	+	21931214-21931263	19qB	Mus musculus transmembrane protein 2 (Tmem2), transcript variant 2, mRNA.	Penetrating at least one phospholipid bilayer of a membrane. May also refer to the state of being buried in the bilayer with no exposure outside the bilayer. When used to describe a protein, indicates that all or part of the peptide sequence is embedded in the membrane [goid 16021] [evidence IEA]; Double layer of lipid molecules that encloses all cells, and, in eukaryotes, many organelles; may be…	Any process specifically pertinent to the functioning of integrated living units: cells, tissues, organs, and organisms. A process is a collection of molecular events with a defined beginning and end [goid 8150] [evidence ND ]	Elemental activities, such as catalysis or binding, describing the actions of a gene product at the molecular level. A given gene product may exhibit one or more molecular functions [goid 3674] [evidence ND ]	MGC102198; mKIAA1412; 3110012M15Rik	MGC102198; mKIAA1412; 3110012M15Rik
4060291	-1.05953	5.2588	-3.33167	0.00824419	0.0290286	-4.62167	Mus musculus	RefSeq	ILMN_212964	ILMN_212964	CTPS2	NM_018737.2	NM_018737.2	NA	55936	31542432	NM_018737.2	Ctps2	NP_061207.1	ILMN_2632076	4060291	S	44	GGCGCTTGTTTTGTACTGTCCCTGGAACCCAACGCTGCAGCACTCGCAAT	X	+	158245753-158245802	XqF4-qF5	Mus musculus cytidine 5'-triphosphate synthase 2 (Ctps2), mRNA.	The part of a cell or its extracellular environment in which a gene product is located. A gene product may be located in one or more parts of a cell and its location may be as specific as a particular macromolecular complex, that is, a stable, persistent association of macromolecules that function together [goid 5575] [evidence ND ]	The chemical reactions and pathways involving glutamine, 2-amino-4-carbamoylbutanoic acid [goid 6541] [evidence IEA]; The chemical reactions and pathways resulting in the formation of a pyrimidine nucleotide, a compound consisting of nucleoside (a pyrimidine base linked to a deoxyribose or ribose sugar) esterified with a phosphate moiety at either the 3' or 5'-hydroxyl group of its glycose moiety…	Catalysis of the ligation of two substances with concomitant breaking of a diphosphate linkage, usually in a nucleoside triphosphate. Ligase is the systematic name for any enzyme of EC class 6 [goid 16874] [evidence IEA]; Catalysis of the reaction: ATP + UTP + NH3 = ADP + phosphate + CTP [goid 3883] [evidence IEA]; Catalysis of a biochemical reaction at physiological temperatures. In biologically…	CTPsH	CTPsH
3060474	0.517786	6.21465	3.33029	0.00826286	0.0290864	-4.62401	Mus musculus	RefSeq	ILMN_192153	ILMN_192153	TRAF2	NM_009422.2	NM_009422.2	NA	22030	83921632	NM_009422.2	Traf2	NP_033448.2	ILMN_1215661	3060474	S	2908	GCTCTAGGATTTCTCCATAGACATTGCCCATTTCTGTCCGTTTTTTCTAC	2	-	25373542-25373591	2qA3	Mus musculus Tnf receptor-associated factor 2 (Traf2), mRNA.	All of the contents of a cell excluding the plasma membrane and nucleus, but including other subcellular structures [goid 5737] [evidence IEA]	Any process that modulates the frequency, rate or extent of the regulated release of immunoglobulins from a cell or group of cells [goid 51023] [evidence IMP]; Any process that modulates the occurrence or rate of cell death by apoptosis [goid 42981] [evidence IEA]; A form of programmed cell death induced by external or internal signals that trigger the activity of proteolytic caspases, whose acti…	Interacting selectively with any metal ion [goid 46872] [evidence IEA]; Interacting selectively with zinc (Zn) ions [goid 8270] [evidence IEA]; Combining with an extracellular or intracellular messenger to initiate a change in cell activity [goid 4872] [evidence IEA]; Interacting selectively with any protein or protein complex (a complex of two or more proteins that may include other nonprotein m…	AI325259	AI325259
4220187	0.571414	7.40403	3.32098	0.00838942	0.0294875	-4.63975	Mus musculus	RefSeq	ILMN_221814	ILMN_221814	RPS6KA4	NM_019924.1	NM_019924.1	NA	56613	9910453	NM_019924.1	Rps6ka4	NP_064308.1	ILMN_2740764	4220187	S	2701	CTAAGTACCCAGTTGCCATGGAGAAGAAATCAGGAGCCCGTATACTGTGC	19	-	6903929-6903978	19qA	Mus musculus ribosomal protein S6 kinase, polypeptide 4 (Rps6ka4), mRNA.	An intracellular organelle, about 200 A in diameter, consisting of RNA and protein. It is the site of protein biosynthesis resulting from translation of messenger RNA (mRNA). It consists of two subunits, one large and one small, each containing only protein and RNA. Both the ribosome and its subunits are characterized by their sedimentation coefficients, expressed in Svedberg units (symbol: S). H…	The process of introducing a phosphate group on to a protein [goid 6468] [evidence IEA]; A series of reactions, mediated by protein kinases, which occurs as a result of a single trigger reaction or compound [goid 7243] [evidence IEA]	Catalysis of the transfer of a phosphate group, usually from ATP, to a substrate molecule [goid 16301] [evidence IEA]; Interacting selectively with a nucleotide, any compound consisting of a nucleoside that is esterified with (ortho)phosphate or an oligophosphate at any hydroxyl group on the ribose or deoxyribose moiety [goid 166] [evidence IEA]; Catalysis of the reaction: ATP + a protein serine/…	Msk2; AI848992; 90kDa; mMSK2; 1110069D02Rik	AI848992; 90kDa; Msk2; mMSK2; 1110069D02Rik
7150349	0.274418	8.81885	3.31972	0.00840672	0.0295321	-4.64188	Mus musculus	RefSeq	ILMN_213304	ILMN_213304	2310079N02RIK	NM_025636.3	NM_025636.3	NA	66566	146134922	NM_025636.3	2310079N02Rik	NP_079912.1	ILMN_2635801	7150349	S	784	GTGAGCTCCAGACTTGTATTTCCTCTTACGGTTGTGCATGCGGTTTGAGT				8qE2	Mus musculus RIKEN cDNA 2310079N02 gene (2310079N02Rik), mRNA.			Interacting selectively with ATP, adenosine 5'-triphosphate, a universally important coenzyme and enzyme regulator [goid 5524] [evidence IEA]; Catalysis of the reaction: a nucleoside triphosphate + H2O = nucleoside diphosphate + phosphate [goid 17111] [evidence IEA]; Catalysis of the transfer of a group, e.g. a methyl group, glycosyl group, acyl group, phosphorus-containing, or other groups, from…	AI449709	AI449709
5310195	0.920713	4.67499	3.31627	0.00845415	0.0296704	-4.64771	Mus musculus	RefSeq	ILMN_189719	ILMN_261778	VANGL2	NM_033509.3	NM_033509.3	NA	93840	118131201	NM_033509.3	Vangl2	NP_277044.1	ILMN_2591811	5310195	S	1304	CATGACTTCCCTGTCTACAACCCCGCCCTCCTCAACCTGCCCAAGTCCGT	1	-	173938684-173938733	1qH3	Mus musculus vang-like 2 (van gogh, Drosophila) (Vangl2), mRNA.	Penetrating at least one phospholipid bilayer of a membrane. May also refer to the state of being buried in the bilayer with no exposure outside the bilayer. When used to describe a protein, indicates that all or part of the peptide sequence is embedded in the membrane [goid 16021] [evidence ISS]; Double layer of lipid molecules that encloses all cells, and, in eukaryotes, many organelles; may be…	Coordinated organization of groups of cells in the plane of an epithelium, such that they all orient to similar coordinates [goid 1736] [evidence IMP]; Any process by which a protein is transported to, or maintained in, apical regions of the cell [goid 45176] [evidence IMP]; The assembly of a sensory cilium, a primary cilium found on sensory neurons that contains an a 9+0 axonemal arrangement of …	Interacting selectively with any protein or protein complex (a complex of two or more proteins that may include other nonprotein molecules) [goid 5515] [evidence IPI]	Lpp1; Vang1l2; Lp; C530001F03Rik; strabismus; Ltap; stbm	Vang1l2; Lp; Ltap; stbm; Lpp1; C530001F03Rik; strabismus
4490079	0.445624	11.2843	3.312	0.00851341	0.0298538	-4.65494	Mus musculus	RefSeq	ILMN_220690	ILMN_220690	ATP5D	NM_025313.1	NM_025313.1	NA	66043	21536219	NM_025313.1	Atp5d	NP_079589.1	ILMN_1254705	4490079	S	551	GGCTGAGATCCAGATCCGTATTGAGGCCAATGAAGCCCTAGTGAAGGCCC	10	+	79608233-79608282	10qC1	Mus musculus ATP synthase, H+ transporting, mitochondrial F1 complex, delta subunit (Atp5d), mRNA.	A proton-transporting two-sector ATPase complex that catalyzes the phosphorylation of ADP to ATP during oxidative phosphorylation. The complex comprises a membrane sector (F0) that carries out proton transport and a cytoplasmic compartment sector (F1) that catalyzes ATP synthesis by a rotational mechanism; the extramembrane sector (containing 3 a and 3 b subunits) is connected via the d-subunit t…	The directed movement of substances (such as macromolecules, small molecules, ions) into, out of, within or between cells, or within a multicellular organism [goid 6810] [evidence IEA]; The directed movement of charged atoms or small charged molecules into, out of, within or between cells [goid 6811] [evidence IEA]; The chemical reactions and pathways resulting in the formation of ATP, adenosine …	Interacting selectively with any metal ion [goid 46872] [evidence IEA]; Catalysis of the transfer of a solute or solutes from one side of a membrane to the other according to the reaction: ATP + H2O + H+(in) = ADP + phosphate + H+(out), by a rotational mechanism [goid 46961] [evidence IEA]; Catalysis of the transfer of a solute or solutes from one side of a membrane to the other according to the …	C85518; AU020773; 1500000I11Rik; 0610008F14Rik; AA960090; AI876556	C85518; AU020773; 1500000I11Rik; 0610008F14Rik; AA960090; AI876556
6550189	-0.589736	6.21197	-3.31104	0.00852678	0.0298906	-4.65656	Mus musculus	RefSeq	ILMN_184374	ILMN_250754	ZSCAN21	NM_001044705.1	NM_001044705.1	NA	22697	113374189	NM_001044705.1	Zscan21	NP_001038170.1	ILMN_2418128	6550189	S	1442	GAGCTCAGACCTCCTTAAACATCAAAGGATGCACACGGAAGAGGCGCCCT	5	+	138574718-138574767	5qG2	Mus musculus zinc finger and SCAN domain containing 21 (Zscan21), transcript variant 4, mRNA.	A membrane-bounded organelle of eukaryotic cells in which chromosomes are housed and replicated. In most cells, the nucleus contains all of the cell's chromosomes except the organellar chromosomes, and is the site of RNA synthesis and processing. In some species, or in specialized cell types, RNA metabolism or DNA replication may be absent [goid 5634] [evidence IDA]; The living contents of a cell…	The process whereby relatively unspecialized cells, e.g. embryonic or regenerative cells, acquire specialized structural and/or functional features that characterize the cells, tissues, or organs of the mature organism or some other relatively stable phase of the organism's life history. Differentiation includes the processes involved in commitment of a cell to a specific fate [goid 30154] [evide…	Interacting selectively with zinc (Zn) ions [goid 8270] [evidence IEA]; Interacting selectively with any metal ion [goid 46872] [evidence IEA]; Interacting selectively with DNA (deoxyribonucleic acid) [goid 3677] [evidence IDA]; The function of binding to a specific DNA sequence in order to modulate transcription. The transcription factor may or may not also interact selectively with a protein or…	Zfp-38; Zipro1; Zfp38; RU49; CTfin51; AI326272	Zfp-38; Zipro1; Zfp38; RU49; CTfin51; AI326272
5870482	-1.01844	4.70868	-3.29345	0.00877546	0.0306557	-4.6863	Mus musculus	RefSeq	ILMN_208795	ILMN_208795	TOE1	NM_026654.2	NM_026654.2	NA	68276	118129870	NM_026654.2	Toe1	NP_080930.1	ILMN_1220416	5870482	S	2	AAGTCTCTGCGTACCTCCAGAAGGCTGGCGAGGGGCGTCATGGCCGCGGA	4	-	116480113-116480124:116480125-116480162	4qD1	Mus musculus target of EGR1, member 1 (nuclear) (Toe1), mRNA.	A membrane-bounded organelle of eukaryotic cells in which chromosomes are housed and replicated. In most cells, the nucleus contains all of the cell's chromosomes except the organellar chromosomes, and is the site of RNA synthesis and processing. In some species, or in specialized cell types, RNA metabolism or DNA replication may be absent [goid 5634] [evidence IEA]		Interacting selectively with any metal ion [goid 46872] [evidence IEA]; Interacting selectively with zinc (Zn) ions [goid 8270] [evidence IEA]; Interacting selectively with any nucleic acid [goid 3676] [evidence IEA]	AI413517; 4930584N22Rik; 4933424D16Rik	AI413517; 4930584N22Rik; 4933424D16Rik
2190709	1.51484	4.51949	3.29018	0.00882259	0.0307994	-4.69184	Mus musculus	RefSeq	ILMN_257350	ILMN_257350	WDR93	NM_001037927.1	NM_001037927.1	NA	626359	83776568	NM_001037927.1	Wdr93	NP_001033016.1	ILMN_3160146	2190709	S	2134	TCTTAAAGAGGTGAGCACCCGGGACGCCATAGCTCCTGCTCAGGACACCA	7	+	86930685-86930698:86930699-86930734	7qD3	Mus musculus WD repeat domain 93 (Wdr93), mRNA.
6370484	0.50217	3.48932	3.28391	0.00891354	0.0310756	-4.70245	Mus musculus	RefSeq	ILMN_223781	ILMN_223781	PYGM	NM_011224.1	NM_011224.1	NA	19309	6755255	NM_011224.1	Pygm	NP_035354.1	ILMN_1220498	6370484	S	2674	TACCCTACCCACTTTGGAACCCACTTTCCCCAGTCTCTAGGTCCTGATGC	19	+	6388149-6388174:6388179-6388202	19qA	Mus musculus muscle glycogen phosphorylase (Pygm), mRNA.	Platelike region of a muscle sarcomere to which the plus ends of actin filaments are attached [goid 30018] [evidence ISO]	The chemical reactions and pathways involving carbohydrates, any of a group of organic compounds based of the general formula Cx(H2O)y. Includes the formation of carbohydrate derivatives by the addition of a carbohydrate residue to another molecule [goid 5975] [evidence IEA]; The chemical reactions and pathways involving glycogen, a polydisperse, highly branched glucan composed of chains of D-glu…	Interacting selectively with a nucleotide, any compound consisting of a nucleoside that is esterified with (ortho)phosphate or an oligophosphate at any hydroxyl group on the ribose or deoxyribose moiety [goid 166] [evidence IEA]; Catalysis of a biochemical reaction at physiological temperatures. In biologically catalyzed reactions, the reactants are known as substrates, and the catalysts are natu…	AI115133	AI115133
3370338	0.220866	11.3085	3.28328	0.00892284	0.0310944	-4.70353	Mus musculus	RefSeq	ILMN_217133	ILMN_217133	1110058L19RIK	NM_026503.2	NM_026503.2	NA	68002	142376292	NM_026503.2	1110058L19Rik	NP_080779.1	ILMN_2679428	3370338	S	300	CGGAGCCTACACGATATGGAGACTGGGAACGGAAGGGACGCTGCATTGAC	1	-	24003095-24003144	1qA5	Mus musculus RIKEN cDNA 1110058L19 gene (1110058L19Rik), mRNA.	The space external to the outermost structure of a cell. For cells without external protective or external encapsulating structures this refers to space outside of the plasma membrane. This term covers the host cell environment outside an intracellular parasite [goid 5576] [evidence IEA]			C6orf57; AI847425; 1700001E18Rik	C6orf57; AI847425; 1700001E18Rik
630279	0.716841	9.43716	3.27892	0.00898663	0.0312913	-4.71089	Mus musculus	RefSeq	ILMN_217084	ILMN_319355	LOC100046744	XM_001475765.1	XM_001475765.1	NA	100046744	149269059	XM_001475765.1	LOC100046744	XP_001475815.1	ILMN_2729870	630279	S	6281	GTATGCCTTCCCTTGAACCTTGGCAGCATCTTGAGGGGAGAGCGTCCTCT					PREDICTED: Mus musculus similar to Serine/arginine repetitive matrix protein 2 (LOC100046744), mRNA.
990273	0.786132	3.62741	3.27788	0.00900194	0.0313361	-4.71265	Mus musculus	RefSeq	ILMN_189930	ILMN_228933	ZBTB26	NM_199025.2	NM_199025.2	NA	320633	71037368	NM_199025.2	Zbtb26	NP_950190.2	ILMN_1212854	990273	S	2255	CTGCTTCCTGCCGTTTGTACTTTTTTGGAGCTGCTGTGGAGAAGTGTGTG	2	-	37290650-37290699	2qB	Mus musculus zinc finger and BTB domain containing 26 (Zbtb26), mRNA.	A membrane-bounded organelle of eukaryotic cells in which chromosomes are housed and replicated. In most cells, the nucleus contains all of the cell's chromosomes except the organellar chromosomes, and is the site of RNA synthesis and processing. In some species, or in specialized cell types, RNA metabolism or DNA replication may be absent [goid 5634] [evidence IEA]		Interacting selectively with any metal ion [goid 46872] [evidence IEA]; Interacting selectively with zinc (Zn) ions [goid 8270] [evidence IEA]	MGC130361; MGC130360; A630026F21Rik	MGC130361; MGC130360; A630026F21Rik
2360743	0.638303	4.23051	3.25434	0.00935599	0.0324718	-4.75251	Mus musculus	RefSeq	ILMN_223111	ILMN_223111	AW544981	NM_145986.1	NM_145986.1	NA	213956	22122434	NM_145986.1	AW544981	NP_666098.1	ILMN_2759499	2360743	S	2909	CACCGTGGCTTCCCAAGCCTTTGTGAGGATTAAACACTTCTGGTAAGTGC	15|NT_039622.1	+	80530273-80530322	15qE1	Mus musculus expressed sequence AW544981 (AW544981), mRNA.				MGC27770	MGC27770
6940066	-1.17595	5.17248	-3.25248	0.00938453	0.0325532	-4.75566	Mus musculus	RefSeq	ILMN_214700	ILMN_236520	DGCR2	NM_010048.2	NM_010048.2	NA	13356	83816900	NM_010048.2	Dgcr2	NP_034178.2	ILMN_2650914	6940066	S	2717	CATACATGCCTCCCAGTCCCTCCACAGCAACCGGGTACCTGGGGATTTTT	16	-	17844257-17844301:17845058-17845062	16qA3	Mus musculus DiGeorge syndrome critical region gene 2 (Dgcr2), mRNA.	Penetrating at least one phospholipid bilayer of a membrane. May also refer to the state of being buried in the bilayer with no exposure outside the bilayer. When used to describe a protein, indicates that all or part of the peptide sequence is embedded in the membrane [goid 16021] [evidence IEA]; Double layer of lipid molecules that encloses all cells, and, in eukaryotes, many organelles; may be…	The attachment of a cell, either to another cell or to an underlying substrate such as the extracellular matrix, via cell adhesion molecules [goid 7155] [evidence IEA]; A change in state or activity of a cell or an organism (in terms of movement, secretion, enzyme production, gene expression, etc.) as a result of a drug stimulus. A drug is a substance used in the diagnosis, treatment or preventio…	Interacting selectively with any mono-, di- or trisaccharide carbohydrate [goid 5529] [evidence IEA]; Combining with an extracellular or intracellular messenger to initiate a change in cell activity [goid 4872] [evidence IEA]; Interacting selectively with any protein or protein complex (a complex of two or more proteins that may include other nonprotein molecules) [goid 5515] [evidence IEA]; The …	Sez12; Dgsc; Idd; mKIAA0163; Lan; 9930034O06Rik; DGS-C	Sez12; mKIAA0163; Lan; 9930034O06Rik; Dgsc; Idd; DGS-C
6980543	-0.58914	3.55708	-3.25015	0.00942049	0.0326559	-4.75961	Mus musculus	RefSeq	ILMN_221295	ILMN_221295	D630004A14RIK	NM_198675.2	NM_198675.2	NA	382137	68051722	NM_198675.2	D630004A14Rik	NP_941077.2	ILMN_2733594	6980543	S	1847	CTGGCAGCAGCAATGCAGTCCCAGTTCAGAAAAGAGATTCAAAGACAGCT	9	+	50580644-50580693	9qA5.3	Mus musculus RIKEN cDNA D630004A14 gene (D630004A14Rik), mRNA.	All of the contents of a cell excluding the plasma membrane and nucleus, but including other subcellular structures [goid 5737] [evidence IEA]	The process by which a pre-tRNA molecule is converted to a mature tRNA, ready for addition of an aminoacyl group [goid 8033] [evidence IEA]; The process of coupling phenylalanine to phenylalanyl-tRNA, catalyzed by phenylalanyl-tRNA synthetase. In tRNA aminoacylation, the amino acid is first activated by linkage to AMP and then transferred to either the 2'- or the 3'-hydroxyl group of the 3'-adeno…	Catalysis of the reaction: ATP + L-phenylalanine + tRNA(Phe) = AMP + diphosphate + L-phenylalanyl-tRNA(Phe) [goid 4826] [evidence IEA]; Interacting selectively with transfer RNA [goid 49] [evidence IEA]; Interacting selectively with magnesium (Mg) ions [goid 287] [evidence IEA]; Interacting selectively with a nucleotide, any compound consisting of a nucleoside that is esterified with (ortho)phosp…
1770639	-1.19718	4.33908	-3.24723	0.00946565	0.0327926	-4.76455	Mus musculus	RefSeq	ILMN_216504	ILMN_216504	DAGLB	NM_144915.3	NM_144915.3	NA	231871	134032008	NM_144915.3	Daglb	NP_659164.2	ILMN_2714548	1770639	S	1533	TGCGGCCCTGTTAGCCATCATGCTCCGGGGGGCCTACCCACAAGTCCGTG	5	+	144255454-144255503	5qG2	Mus musculus diacylglycerol lipase, beta (Daglb), mRNA.	Penetrating at least one phospholipid bilayer of a membrane. May also refer to the state of being buried in the bilayer with no exposure outside the bilayer. When used to describe a protein, indicates that all or part of the peptide sequence is embedded in the membrane [goid 16021] [evidence IEA]; Double layer of lipid molecules that encloses all cells, and, in eukaryotes, many organelles; may be…	The chemical reactions and pathways resulting in the breakdown of lipids, compounds soluble in an organic solvent but not, or sparingly, in an aqueous solvent [goid 16042] [evidence IEA]; The chemical reactions and pathways involving lipids, compounds soluble in an organic solvent but not, or sparingly, in an aqueous solvent. Includes fatty acids; neutral fats, other fatty-acid esters, and soaps;…	Catalysis of the hydrolysis of various bonds, e.g. C-O, C-N, C-C, phosphoric anhydride bonds, etc. Hydrolase is the systematic name for any enzyme of EC class 3 [goid 16787] [evidence IEA]; Interacting selectively with calcium ions (Ca2+) [goid 5509] [evidence IEA]; Interacting selectively with any metal ion [goid 46872] [evidence IEA]; Catalysis of a biochemical reaction at physiological tempera…	E330036I19Rik; MGC27690	E330036I19Rik; MGC27690
5890193	-1.1329	3.8199	-3.24719	0.0094663	0.0327926	-4.76462	Mus musculus	RefSeq	ILMN_222274	ILMN_222274	SLC35F1	NM_178675.3	NM_178675.3	NA	215085	40254331	NM_178675.3	Slc35f1	NP_848790.2	ILMN_2747211	5890193	S	3920	GATCAGACATTAATGCACCTGTGTTGGTTTATCTCCATTCATGAAGCTGG	10	+	52830479-52830528	10qB3	Mus musculus solute carrier family 35, member F1 (Slc35f1), mRNA.	Penetrating at least one phospholipid bilayer of a membrane. May also refer to the state of being buried in the bilayer with no exposure outside the bilayer. When used to describe a protein, indicates that all or part of the peptide sequence is embedded in the membrane [goid 16021] [evidence IEA]; Double layer of lipid molecules that encloses all cells, and, in eukaryotes, many organelles; may be…	The directed movement of substances (such as macromolecules, small molecules, ions) into, out of, within or between cells, or within a multicellular organism [goid 6810] [evidence IEA]		E130016L02; Duf6	E130016L02; Duf6
6480561	0.583378	6.56257	3.24257	0.00953833	0.0330021	-4.77245	Mus musculus	RefSeq	ILMN_213066	ILMN_213066	ASB6	NM_133346.2	NM_133346.2	NA	72323	115311559	NM_133346.2	Asb6	NP_579924.1	ILMN_1254737	6480561	S	1750	CCATTCAGTAAGGCCCTACCCATTCATTCTGCCGCCTCGGGTCTCATGAT	2	-	30678931-30678980	2qB	Mus musculus ankyrin repeat and SOCS box-containing 6 (Asb6), mRNA.	All of the contents of a cell excluding the plasma membrane and nucleus, but including other subcellular structures [goid 5737] [evidence IEA]; The part of a cell or its extracellular environment in which a gene product is located. A gene product may be located in one or more parts of a cell and its location may be as specific as a particular macromolecular complex, that is, a stable, persistent …	The chemical reactions and pathways resulting in the breakdown of a protein or peptide by hydrolysis of its peptide bonds, initiated by the covalent attachment of a ubiquitin moiety, or multiple ubiquitin moieties, to the protein [goid 6511] [evidence IEA]; A series of reactions within the cell that occur as a result of a single trigger reaction or compound [goid 7242] [evidence IEA]		2510004M11Rik; AA409356	2510004M11Rik; AA409356
6420025	0.814748	3.85776	3.23958	0.00958526	0.0331288	-4.77751	Mus musculus	RefSeq	ILMN_211140	ILMN_211140	CNTFR	NM_016673.1	NM_016673.1	NA	12804	7710005	NM_016673.1	Cntfr	NP_057882.1	ILMN_1226232	6420025	S	1339	GCAGACCCCGGTTTCTATTTTGCACACGGGCAGGAGGACCTTTTGCATTC	4	-	41605068-41605117	4qA5	Mus musculus ciliary neurotrophic factor receptor (Cntfr), mRNA.	Double layer of lipid molecules that encloses all cells, and, in eukaryotes, many organelles; may be a single or double lipid bilayer; also includes associated proteins [goid 16020] [evidence IEA]; The membrane surrounding a cell that separates the cell from its external environment. It consists of a phospholipid bilayer and associated proteins [goid 5886] [evidence IEA]; Tethered to a membrane b…	Any process that activates or increases the rate or extent of cell proliferation [goid 8284] [evidence IGI]	Combining with an extracellular or intracellular messenger to initiate a change in cell activity [goid 4872] [evidence IEA]; Interacting selectively with any protein or protein complex (a complex of two or more proteins that may include other nonprotein molecules) [goid 5515] [evidence IPI]; [goid 4896] [evidence IEA]	Cntfralpha	Cntfralpha
4200646	-0.922009	3.90332	-3.23723	0.00962224	0.0332387	-4.78149	Mus musculus	RefSeq	ILMN_220433	ILMN_220433	CTSS	NM_021281.1	NM_021281.1	NA	13040	10946581	NM_021281.1	Ctss	NP_067256.1	ILMN_1246861	4200646	S	1156	CCAAGTGTGTCGTGATCAATGTGTAGTTACTGTACTAACTAGGTTATAGC	3	+	95360184-95360233	3qF2.1	Mus musculus cathepsin S (Ctss), mRNA.	Double layer of lipid molecules that encloses all cells, and, in eukaryotes, many organelles; may be a single or double lipid bilayer; also includes associated proteins [goid 16020] [evidence IDA]; A cytoplasmic, membrane-bounded organelle that is found in most animal cells and that contains a variety of hydrolases, most of which have their maximal activities in the pH range 5-6. The contained en…	The hydrolysis of a peptide bond or bonds within a protein [goid 6508] [evidence IDA]	Catalysis of the hydrolysis of various bonds, e.g. C-O, C-N, C-C, phosphoric anhydride bonds, etc. Hydrolase is the systematic name for any enzyme of EC class 3 [goid 16787] [evidence IEA]; Catalysis of the hydrolysis of peptide bonds in a polypeptide chain by a mechanism in which the sulfhydryl group of a cysteine residue at the active center acts as a nucleophile [goid 8234] [evidence IEA]; Cat…
3390538	1.07272	4.60128	3.23274	0.00969344	0.0334757	-4.7891	Mus musculus	RefSeq	ILMN_214163	ILMN_214163	TPRKB	NM_176842.2	NM_176842.2	NA	69786	31341154	NM_176842.2	Tprkb	NP_789812.1	ILMN_2738991	3390538	S	222	CAGGAGACTTGAGAAAAAAGGCCATGGAAGGATCTATTGATGGTTCATTG	6	+	85874452-85874501	6qC3	Mus musculus Tp53rk binding protein (Tprkb), mRNA.	All of the contents of a cell excluding the plasma membrane and nucleus, but including other subcellular structures [goid 5737] [evidence IEA]; A membrane-bounded organelle of eukaryotic cells in which chromosomes are housed and replicated. In most cells, the nucleus contains all of the cell's chromosomes except the organellar chromosomes, and is the site of RNA synthesis and processing. In some …	Any process specifically pertinent to the functioning of integrated living units: cells, tissues, organs, and organisms. A process is a collection of molecular events with a defined beginning and end [goid 8150] [evidence ND ]	Interacting selectively with a protein kinase, any enzyme that catalyzes the transfer of a phosphate group, usually from ATP, to a protein substrate [goid 19901] [evidence ISA]	mDRWMS1; Cgi-121; 1810034M08Rik; 0610033G21Rik; DRWMS1	mDRWMS1; Cgi-121; 1810034M08Rik; 0610033G21Rik; DRWMS1
5870093	0.84165	4.55082	3.22997	0.00973764	0.0336012	-4.79379	Mus musculus	RefSeq	ILMN_217569	ILMN_217569	TAP1	NM_013683.1	NM_013683.1	NA	21354	7305538	NM_013683.1	Tap1	NP_038711.1	ILMN_1250409	5870093	S	2108	TGCAGCTCATGAAGAGAGGAGGGTGCTACCGGGCCATGGTAGAGGCTCTT	17	+	34328425-34328471:34328442-34328444	17qB1	Mus musculus transporter 1, ATP-binding cassette, sub-family B (MDR/TAP) (Tap1), mRNA.	The irregular network of unit membranes, visible only by electron microscopy, that occurs in the cytoplasm of many eukaryotic cells. The membranes form a complex meshwork of tubular channels, which are often expanded into slitlike cavities called cisternae. The ER takes two forms, rough (or granular), with ribosomes adhering to the outer surface, and smooth (with no ribosomes attached) [goid 5783…	The directed movement of oligopeptides into, out of, within or between cells. Oligopeptides are molecules that contain a small number (2 to 20) of amino-acid residues connected by peptide linkages [goid 6857] [evidence IEA]; The directed movement of substances (such as macromolecules, small molecules, ions) into, out of, within or between cells, or within a multicellular organism [goid 6810] [evi…	Catalysis of the reaction: ATP + H2O = ADP + phosphate to directly drive the active transport of a substance across a membrane [goid 42626] [evidence IEA]; Interacting selectively with a nucleotide, any compound consisting of a nucleoside that is esterified with (ortho)phosphate or an oligophosphate at any hydroxyl group on the ribose or deoxyribose moiety [goid 166] [evidence IEA]; Enables the d…	Ham1; ABC17; PSF1; Abcb2; APT1; Tap-1; RING4; MTP1; Y3; TAP; Ham-1	Ham1; ABC17; PSF1; Abcb2; APT1; Tap-1; RING4; MTP1; Y3; TAP; Ham-1
5560246	-0.339504	9.47316	-3.22651	0.00979299	0.033774	-4.79964	Mus musculus	RefSeq	ILMN_215444	ILMN_215444	RAC1	NM_009007.2	NM_009007.2	NA	19353	117676397	NM_009007.2	Rac1	NP_033033.1	ILMN_2659616	5560246	S	1637	CCTCCACTGCCGTCCCTCCCCAGATGGGGCGTTGAGTCCATATTTAAACT	5	-	144266931-144266980	5qG2	Mus musculus RAS-related C3 botulinum substrate 1 (Rac1), mRNA.	That fraction of cells, prepared by disruptive biochemical methods, that includes the plasma and other membranes [goid 5624] [evidence IDA]; All of the contents of a cell excluding the plasma membrane and nucleus, but including other subcellular structures [goid 5737] [evidence IDA]; A membrane-bounded vesicle found in the cytoplasm of the cell [goid 16023] [evidence IDA]; Loosely bound to one su…	The attachment of a cell, either to another cell or to an underlying substrate such as the extracellular matrix, via cell adhesion molecules [goid 7155] [evidence IDA]; The orderly movement of cells from one site to another, often during the development of a multicellular organism [goid 16477] [evidence IDA]; The process by which the migration of an axon growth cone is directed to a specific targ…	Interacting selectively with any protein or protein complex (a complex of two or more proteins that may include other nonprotein molecules) [goid 5515] [evidence IPI]; Catalysis of the reaction: GTP + H2O = GDP + phosphate [goid 3924] [evidence IDA]; Interacting selectively with GTP, guanosine triphosphate [goid 5525] [evidence IDA]; Interacting selectively with any protein or protein complex (a …	D5Ertd559e; AL023026	D5Ertd559e; AL023026
5220037	0.755792	3.75671	3.22092	0.00988344	0.0340631	-4.80912	Mus musculus	RefSeq	ILMN_201560	ILMN_201560	TCF20	NM_013836.2	NM_013836.2	NA	21411	37620160	NM_013836.2	Tcf20	NP_038864.2	ILMN_2627638	5220037	S	4829	GATTTCACCCAAACAAGAAAGTTTCCCCCCTAAAGGGTATTTCCCATCAG	15	-	82682985-82683034	15qE1	Mus musculus transcription factor 20 (Tcf20), mRNA.	A membrane-bounded organelle of eukaryotic cells in which chromosomes are housed and replicated. In most cells, the nucleus contains all of the cell's chromosomes except the organellar chromosomes, and is the site of RNA synthesis and processing. In some species, or in specialized cell types, RNA metabolism or DNA replication may be absent [goid 5634] [evidence IEA]	Any process that modulates the frequency, rate or extent of DNA-dependent transcription [goid 6355] [evidence IEA]; The synthesis of either RNA on a template of DNA or DNA on a template of RNA [goid 6350] [evidence IEA]	Interacting selectively with any metal ion [goid 46872] [evidence IEA]; Interacting selectively with zinc (Zn) ions [goid 8270] [evidence IEA]; Interacting selectively with DNA (deoxyribonucleic acid) [goid 3677] [evidence IEA]; Interacting selectively with any protein or protein complex (a complex of two or more proteins that may include other nonprotein molecules) [goid 5515] [evidence IEA]	2810438H08Rik; mKIAA0292; SPBP	2810438H08Rik; mKIAA0292; SPBP
1770546	0.545216	5.81387	3.2182	0.00992758	0.0342061	-4.81372	Mus musculus	RefSeq	ILMN_185607	ILMN_245530	BAZ2A	NM_054078.2	NM_054078.2	NA	116848	114205434	NM_054078.2	Baz2a	NP_473419.2	ILMN_2652385	1770546	S	5562	CCTGTGAACCCTCGCTTGGTGAGTGGATACCGACGTGTCATCAAGAACCC	10	+	127563434-127563483	10qD3	Mus musculus bromodomain adjacent to zinc finger domain, 2A (Baz2a), mRNA.	A membrane-bounded organelle of eukaryotic cells in which chromosomes are housed and replicated. In most cells, the nucleus contains all of the cell's chromosomes except the organellar chromosomes, and is the site of RNA synthesis and processing. In some species, or in specialized cell types, RNA metabolism or DNA replication may be absent [goid 5634] [evidence IEA]	Any process that modulates the frequency, rate or extent of DNA-dependent transcription [goid 6355] [evidence IEA]; The synthesis of either RNA on a template of DNA or DNA on a template of RNA [goid 6350] [evidence IEA]	Interacting selectively with any metal ion [goid 46872] [evidence IEA]; Interacting selectively with zinc (Zn) ions [goid 8270] [evidence IEA]; Interacting selectively with DNA (deoxyribonucleic acid) [goid 3677] [evidence IEA]; Interacting selectively with any protein or protein complex (a complex of two or more proteins that may include other nonprotein molecules) [goid 5515] [evidence IEA]	Walp3; mKIAA0314; Tip5; C78388; C030005G16Rik; AA415431	Walp3; mKIAA0314; Tip5; C78388; C030005G16Rik; AA415431
5700424	0.518368	8.46837	3.20965	0.0100681	0.03463	-4.82822	Mus musculus	RefSeq	ILMN_222240	ILMN_222240	CCNL1	NM_019937.3	NM_019937.3	NA	56706	90403610	NM_019937.3	Ccnl1	NP_064321.2	ILMN_1228850	5700424	S	1494	CAAATAGACACGGTCATAAGAGGAAAAAGTCTCGGTCTCGATCTCAGAGC	3	-	65750674-65750723	3qE1	Mus musculus cyclin L1 (Ccnl1), mRNA.	A membrane-bounded organelle of eukaryotic cells in which chromosomes are housed and replicated. In most cells, the nucleus contains all of the cell's chromosomes except the organellar chromosomes, and is the site of RNA synthesis and processing. In some species, or in specialized cell types, RNA metabolism or DNA replication may be absent [goid 5634] [evidence IEA]; Any protein complex that inte…	Any process that modulates the frequency, rate or extent of DNA-dependent transcription [goid 6355] [evidence IEA]; Any process specifically pertinent to the functioning of integrated living units: cells, tissues, organs, and organisms. A process is a collection of molecular events with a defined beginning and end [goid 8150] [evidence ND ]; The synthesis of either RNA on a template of DNA or DNA…	Elemental activities, such as catalysis or binding, describing the actions of a gene product at the molecular level. A given gene product may exhibit one or more molecular functions [goid 3674] [evidence ND ]	Ccnl; 2610030E23Rik; ania-6a; AU018493	Ccnl; 2610030E23Rik; ania-6a; AU018493
6510634	0.70082	3.71633	3.20628	0.010124	0.0347849	-4.83393	Mus musculus	RefSeq	ILMN_213766	ILMN_234881	PIR	NM_027153.2	NM_027153.2	NA	69656	118130337	NM_027153.2	Pir	NP_081429.1	ILMN_2640551	6510634	S	1087	CAGAAATGCAAAAAATGGTTTTGAGGGGGCCAGAACCTGGAAGTCAAAGA	X	+	160810437-160810486	XqF5	Mus musculus pirin (Pir), mRNA.	A membrane-bounded organelle of eukaryotic cells in which chromosomes are housed and replicated. In most cells, the nucleus contains all of the cell's chromosomes except the organellar chromosomes, and is the site of RNA synthesis and processing. In some species, or in specialized cell types, RNA metabolism or DNA replication may be absent [goid 5634] [evidence IEA]		Interacting selectively with iron (Fe) ions [goid 5506] [evidence IEA]; Interacting selectively with any metal ion [goid 46872] [evidence IEA]	2310042L19Rik	2310042L19Rik
2070278	0.420495	7.44125	3.19977	0.0102329	0.0351357	-4.84496	Mus musculus	RefSeq	ILMN_193851	ILMN_247289	SEC22C	NM_178677.3	NM_178677.3	NA	215474	142372397	NM_178677.3	Sec22c	NP_848792.1	ILMN_2752506	2070278	S	2525	GCAGCTTCCTCGGACGTGAACTTCAGCCTCACGTCAATGTTGATCTCACG	9	-	121592301-121592350	9qF4	Mus musculus SEC22 vesicle trafficking protein homolog C (S. cerevisiae) (Sec22c), mRNA.	The irregular network of unit membranes, visible only by electron microscopy, that occurs in the cytoplasm of many eukaryotic cells. The membranes form a complex meshwork of tubular channels, which are often expanded into slitlike cavities called cisternae. The ER takes two forms, rough (or granular), with ribosomes adhering to the outer surface, and smooth (with no ribosomes attached) [goid 5783…	The directed movement of proteins into, out of, within or between cells [goid 15031] [evidence IEA]; The directed movement of substances, either within a vesicle or in the vesicle membrane, into, out of or within a cell [goid 16192] [evidence IEA]; The directed movement of substances (such as macromolecules, small molecules, ions) into, out of, within or between cells, or within a multicellular o…		Sec22l3; 5930407I15Rik; C530046H07; 4932412K21	Sec22l3; 5930407I15Rik; C530046H07; 4932412K21
3710424	-0.348249	11.9825	-3.19891	0.0102473	0.0351805	-4.84641	Mus musculus	RefSeq	ILMN_220837	ILMN_318888	LOC100048413	XM_001480186.1	XM_001480186.1	NA	100048413	149255777	XM_001480186.1	LOC100048413	XP_001480236.1	ILMN_2727536	3710424	S	919	GCGGCTGAGTAACCATCCTTGAAATGACTGTCCTTTCCAACCTCTATCCC					PREDICTED: Mus musculus similar to Myeloid leukemia factor 2 (LOC100048413), mRNA.
3990152	0.4561	6.49515	3.19837	0.0102565	0.0352026	-4.84733	Mus musculus	RefSeq	ILMN_223280	ILMN_223280	FSD1	NM_183178.2	NM_183178.2	NA	240121	118130725	NM_183178.2	Fsd1	NP_899001.1	ILMN_1254128	3990152	S	1619	GGCCAGGCCATCTACCAGCTGGGGTGCTTCAGCCCAGCTTCTTCTTTCTG	17	+	56136175-56136175:56136176-56136224	17qD	Mus musculus fibronectin type 3 and SPRY domain-containing protein (Fsd1), mRNA.	All of the contents of a cell excluding the plasma membrane and nucleus, but including other subcellular structures [goid 5737] [evidence IEA]; A membrane-bounded organelle of eukaryotic cells in which chromosomes are housed and replicated. In most cells, the nucleus contains all of the cell's chromosomes except the organellar chromosomes, and is the site of RNA synthesis and processing. In some …	The process resulting in the physical partitioning and separation of a cell into daughter cells [goid 51301] [evidence IEA]; Progression through mitosis, the division of the eukaryotic cell nucleus to produce two daughter nuclei that, usually, contain the identical chromosome complement to their mother [goid 7067] [evidence IEA]; The progression of biochemical and morphological phases and events …		MGC58341	MGC58341
3850520	0.473816	7.2919	3.19471	0.0103183	0.0353911	-4.85352	Mus musculus	RefSeq	ILMN_189126	ILMN_189126	ZFP592	NM_178707.3	NM_178707.3	NA	233410	141802739	NM_178707.3	Zfp592	NP_848822.1	ILMN_2458587	3850520	S	4704	GGGTGTGTGGCACACAGATATTGGGGTATTTGTATTTTTGTTCCTGTGCC	7	+	88187460-88187509	7qD3	Mus musculus zinc finger protein 592 (Zfp592), mRNA.	A membrane-bounded organelle of eukaryotic cells in which chromosomes are housed and replicated. In most cells, the nucleus contains all of the cell's chromosomes except the organellar chromosomes, and is the site of RNA synthesis and processing. In some species, or in specialized cell types, RNA metabolism or DNA replication may be absent [goid 5634] [evidence IEA]; The living contents of a cell…	Any process that modulates the frequency, rate or extent of DNA-dependent transcription [goid 6355] [evidence IEA]; The synthesis of either RNA on a template of DNA or DNA on a template of RNA [goid 6350] [evidence IEA]	Interacting selectively with zinc (Zn) ions [goid 8270] [evidence IEA]; Interacting selectively with DNA (deoxyribonucleic acid) [goid 3677] [evidence IEA]; Interacting selectively with any metal ion [goid 46872] [evidence IEA]	mKIAA0211; 8430405N24; A730014M16Rik	mKIAA0211; 8430405N24; A730014M16Rik
6040142	-0.296326	8.463	-3.18866	0.0104216	0.0356929	-4.86379	Mus musculus	RefSeq	ILMN_208766	ILMN_208766	POU6F1	NM_010127.3	NM_010127.3	NA	19009	133892217	NM_010127.3	Pou6f1	NP_034257.1	ILMN_2589318	6040142	S	4393	TTGTGTTCTTGAAAAGCCAGTCACCTTCCTATTCCCAGGACGCCTTTCCT	15	-	100405881-100405930	15qF1	Mus musculus POU domain, class 6, transcription factor 1 (Pou6f1), mRNA.	A membrane-bounded organelle of eukaryotic cells in which chromosomes are housed and replicated. In most cells, the nucleus contains all of the cell's chromosomes except the organellar chromosomes, and is the site of RNA synthesis and processing. In some species, or in specialized cell types, RNA metabolism or DNA replication may be absent [goid 5634] [evidence IDA]	Any process that modulates the frequency, rate or extent of DNA-dependent transcription [goid 6355] [evidence IEA]; The synthesis of either RNA on a template of DNA or DNA on a template of RNA [goid 6350] [evidence IEA]; Any process that modulates the frequency, rate or extent of the synthesis of either RNA on a template of DNA or DNA on a template of RNA [goid 45449] [evidence IEA]; Any process …	Interacting selectively with DNA of a specific nucleotide composition, e.g. GC-rich DNA binding, or with a specific sequence motif or type of DNA e.g. promotor binding or rDNA binding [goid 43565] [evidence IDA]; Interacting selectively with DNA (deoxyribonucleic acid) [goid 3677] [evidence IDA]; The function of binding to a specific DNA sequence in order to modulate transcription. The transcript…	2310038G18Rik; C79593; Emb; Brn5.0	2310038G18Rik; C79593; Emb; Brn5.0
3610553	-0.416189	9.39015	-3.18799	0.010433	0.0357273	-4.86492	Mus musculus	RefSeq	ILMN_217076	ILMN_235409	RNF145	NM_028862.2	NM_028862.2	NA	74315	141801878	NM_028862.2	Rnf145	NP_083138.1	ILMN_2678851	3610553	S	3251	CCCCACTCTGCAAACACCACTTTTGAAGCTGTTAATACACTTTGCACCCT	11	+	44378703-44378752	11qB1.1	Mus musculus ring finger protein 145 (Rnf145), mRNA.	Double layer of lipid molecules that encloses all cells, and, in eukaryotes, many organelles; may be a single or double lipid bilayer; also includes associated proteins [goid 16020] [evidence IEA]; Penetrating at least one phospholipid bilayer of a membrane. May also refer to the state of being buried in the bilayer with no exposure outside the bilayer. When used to describe a protein, indicates …		Interacting selectively with any metal ion [goid 46872] [evidence IEA]; Interacting selectively with zinc (Zn) ions [goid 8270] [evidence IEA]; Combining with an extracellular or intracellular messenger to initiate a change in cell activity [goid 4872] [evidence IEA]; Interacting selectively with any protein or protein complex (a complex of two or more proteins that may include other nonprotein m…	RP23-103H9.1; TMRF1; 3732413I11Rik	RP23-103H9.1; TMRF1; 3732413I11Rik
7330706	0.381539	10.7026	3.18512	0.0104825	0.0358709	-4.86979	Mus musculus	RefSeq	ILMN_209531	ILMN_209531	NDUFS2	NM_153064.4	NM_153064.4	NA	226646	142376353	NM_153064.4	Ndufs2	NP_694704.1	ILMN_1224781	7330706	S	655	TTCGAGTTCTATGAGCGGGTGTCTGGGGCCCGGATGCACGCGGCGTATAT	1	-	173168862-173168911	1qH3	Mus musculus NADH dehydrogenase (ubiquinone) Fe-S protein 2 (Ndufs2), mRNA.	Double layer of lipid molecules that encloses all cells, and, in eukaryotes, many organelles; may be a single or double lipid bilayer; also includes associated proteins [goid 16020] [evidence IEA]; The inner, i.e. lumen-facing, lipid bilayer of the mitochondrial envelope. It is highly folded to form cristae [goid 5743] [evidence IEA]; The protein complexes that form the mitochondrial electron tra…	The directed movement of substances (such as macromolecules, small molecules, ions) into, out of, within or between cells, or within a multicellular organism [goid 6810] [evidence IEA]; Any process specifically pertinent to the functioning of integrated living units: cells, tissues, organs, and organisms. A process is a collection of molecular events with a defined beginning and end [goid 8150] […	Interacting selectively with a 4 iron, 4 sulfur (4Fe-4S) cluster; this cluster consists of four iron atoms, with the inorganic sulfur atoms found between the irons and acting as bridging ligands [goid 51539] [evidence IEA]; Interacting selectively with an iron-sulfur cluster, a combination of iron and sulfur atoms [goid 51536] [evidence IEA]; Interacting selectively with iron (Fe) ions [goid 5506…	MGC27667; AL033311	MGC27667; AL033311
5390370	1.22345	4.10091	3.18507	0.0104833	0.0358709	-4.86987	Mus musculus	RefSeq	ILMN_223069	ILMN_223069	ZFP811	NM_183177.1	NM_183177.1	NA	240063	34147227	NM_183177.1	Zfp811	NP_899000.1	ILMN_1260451	5390370	S	1823	TAGCTGTGGTGTTTTCACATAAACTCACTGGAGAAAAGGGGGACTTTTTG	17	-	32934206-32934255	17qB1	Mus musculus zinc finger protein 811 (Zfp811), mRNA.			Interacting selectively with any metal ion [goid 46872] [evidence IEA]; Interacting selectively with zinc (Zn) ions [goid 8270] [evidence IEA]	BC052046; MGC62423	BC052046; MGC62423
1660538	1.99115	4.39426	3.18292	0.0105205	0.0359837	-4.87352	Mus musculus	RefSeq	ILMN_213956	ILMN_213956	IER2	NM_010499.3	NM_010499.3	NA	15936	141802849	NM_010499.3	Ier2	NP_034629.2	ILMN_2642705	1660538	S	3128	GGACCTCGAAGACACCTTATTACTGAGGGAATGATGGGTGGGTAAAGCTT	8	-	87183570-87183619	8qC3	Mus musculus immediate early response 2 (Ier2), mRNA.	All of the contents of a cell excluding the plasma membrane and nucleus, but including other subcellular structures [goid 5737] [evidence IDA]	Any process specifically pertinent to the functioning of integrated living units: cells, tissues, organs, and organisms. A process is a collection of molecular events with a defined beginning and end [goid 8150] [evidence ND ]	Elemental activities, such as catalysis or binding, describing the actions of a gene product at the molecular level. A given gene product may exhibit one or more molecular functions [goid 3674] [evidence ND ]	ch1; AI317238; pip92	ch1; AI317238; pip92
2480288	-0.327665	9.02816	-3.1807	0.010559	0.0360963	-4.87728	Mus musculus	RefSeq	ILMN_212297	ILMN_212297	RAP2A	NM_029519.3	NM_029519.3	NA	76108	118130630	NM_029519.3	Rap2a	NP_083795.2	ILMN_2624862	2480288	S	3540	GCCTTCTAGGTGTTTCTGTACACCGTGAGAGGTGCTTTGAACTCCCACCC	14	+	120905782-120905831	14qE4	Mus musculus RAS related protein 2a (Rap2a), mRNA.	Double layer of lipid molecules that encloses all cells, and, in eukaryotes, many organelles; may be a single or double lipid bilayer; also includes associated proteins [goid 16020] [evidence IEA]; The membrane surrounding a cell that separates the cell from its external environment. It consists of a phospholipid bilayer and associated proteins [goid 5886] [evidence IEA]; The living contents of a…	Any series of molecular signals in which a small monomeric GTPase relays one or more of the signals [goid 7264] [evidence IEA]	Interacting selectively with GTP, guanosine triphosphate [goid 5525] [evidence IEA]; Interacting selectively with a nucleotide, any compound consisting of a nucleoside that is esterified with (ortho)phosphate or an oligophosphate at any hydroxyl group on the ribose or deoxyribose moiety [goid 166] [evidence IEA]	5830461H18Rik	5830461H18Rik
4560762	1.02879	3.87963	3.17597	0.0106416	0.0363544	-4.88531	Mus musculus	RefSeq	ILMN_216351	ILMN_216351	TTC36	NM_138951.1	NM_138951.1	NA	192653	20336733	NM_138951.1	Ttc36	NP_620401.1	ILMN_2670057	4560762	S	481	CGCGCCGCCCGCCAGAGCTTCGTGCAGAGCGGGCTACTGGCGAGATTTCA	9	-	44607716-44607765	9qA5.2	Mus musculus tetratricopeptide repeat domain 36 (Ttc36), mRNA.			The selective, often stoichiometric, interaction of a molecule with one or more specific sites on another molecule [goid 5488] [evidence IEA]	MGC25970; MGC37912; MGC37247; MGC37838	MGC25970; MGC37912; MGC37247; MGC37838
6400382	-0.493184	7.91001	-3.17158	0.0107187	0.0365932	-4.89273	Mus musculus	RefSeq	ILMN_209228	ILMN_209228	ARMC8	NM_028768.2	NM_028768.2	NA	74125	142348917	NM_028768.2	Armc8	NP_083044.1	ILMN_1230072	6400382	S	306	CAGCTAGCAGTCGCCACTATGTTGACAGGCTATTTGACCCTGATCCCCAG	9	-	99451981-99452030	9qE3.3	Mus musculus armadillo repeat containing 8 (Armc8), mRNA.	The part of a cell or its extracellular environment in which a gene product is located. A gene product may be located in one or more parts of a cell and its location may be as specific as a particular macromolecular complex, that is, a stable, persistent association of macromolecules that function together [goid 5575] [evidence ND ]	Any process specifically pertinent to the functioning of integrated living units: cells, tissues, organs, and organisms. A process is a collection of molecular events with a defined beginning and end [goid 8150] [evidence ND ]	Elemental activities, such as catalysis or binding, describing the actions of a gene product at the molecular level. A given gene product may exhibit one or more molecular functions [goid 3674] [evidence ND ]; The selective, often stoichiometric, interaction of a molecule with one or more specific sites on another molecule [goid 5488] [evidence IEA]	1200015K23Rik; HSPC056	1200015K23Rik; HSPC056
6110541	0.907017	3.8238	3.16926	0.0107597	0.0367139	-4.89667	Mus musculus	RefSeq	ILMN_185297	ILMN_185297	WNT8B	NM_011720.2	NM_011720.2	NA	22423	142389070	NM_011720.2	Wnt8b	NP_035850.1	ILMN_2425854	6110541	S	1541	GCCATAGCTTCACCTCCCTCCTGTGAGCCAGAGCTTCTAGGCCTAGACTC	19	+	44586929-44586978	19qC3	Mus musculus wingless related MMTV integration site 8b (Wnt8b), mRNA.	The space external to the outermost structure of a cell. For cells without external protective or external encapsulating structures this refers to space outside of the plasma membrane. This term covers the host cell environment outside an intracellular parasite [goid 5576] [evidence IEA]; A layer consisting mainly of proteins (especially collagen) and glycosaminoglycans (mostly as proteoglycans) …	The biological process whose specific outcome is the progression of a multicellular organism over time from an initial condition (e.g. a zygote or a young adult) to a later condition (e.g. a multicellular animal or an aged adult) [goid 7275] [evidence IEA]; The series of molecular signals initiated by binding of Wnt protein to a frizzled family receptor on the surface of the target cell and endin…	Mediates the transfer of a signal from the outside to the inside of a cell by means other than the introduction of the signal molecule itself into the cell [goid 4871] [evidence IEA]; Interacting selectively with one or more specific sites on a receptor molecule, a macromolecule that undergoes combination with a hormone, neurotransmitter, drug or intracellular messenger to initiate a change in ce…
1070358	-0.24048	11.0279	-3.16682	0.010803	0.0368469	-4.9008	Mus musculus	RefSeq	ILMN_222838	ILMN_222838	MRPL54	NM_025317.2	NM_025317.2	NA	66047	142385694	NM_025317.2	Mrpl54	NP_079593.1	ILMN_2755519	1070358	S	380	GGCGACTACTTCGCAAACAGAATATCTGGCGCCACAACCGGCTGAGCAAG	10	-	80727624-80727673	10qC1	Mus musculus mitochondrial ribosomal protein L54 (Mrpl54), nuclear gene encoding mitochondrial protein, mRNA.	An intracellular organelle, about 200 A in diameter, consisting of RNA and protein. It is the site of protein biosynthesis resulting from translation of messenger RNA (mRNA). It consists of two subunits, one large and one small, each containing only protein and RNA. Both the ribosome and its subunits are characterized by their sedimentation coefficients, expressed in Svedberg units (symbol: S). H…	Any process specifically pertinent to the functioning of integrated living units: cells, tissues, organs, and organisms. A process is a collection of molecular events with a defined beginning and end [goid 8150] [evidence ND ]	Elemental activities, such as catalysis or binding, describing the actions of a gene product at the molecular level. A given gene product may exhibit one or more molecular functions [goid 3674] [evidence ND ]	0610008M19Rik; D10Sut1e	0610008M19Rik; D10Sut1e
5720630	-0.199105	10.8007	-3.16522	0.0108316	0.0369345	-4.90352	Mus musculus	RefSeq	ILMN_217297	ILMN_251267	CCDC23	NM_001038998.1	NM_001038998.1	NA	69216	84872228	NM_001038998.1	Ccdc23	NP_001034087.1	ILMN_2681604	5720630	S	478	AGCCTGCATCCCCGGCAGAGGAACTGGTGCCTGCCTTTGTCTGTGAGCTC	4	+	118873592-118873641	4qD2.1	Mus musculus coiled-coil domain containing 23 (Ccdc23), transcript variant 1, mRNA.				RP23-344D2.7; AI851162; 2410005K17Rik	RP23-344D2.7; AI851162; 2410005K17Rik
2900768	0.246824	9.83749	3.16224	0.0108848	0.0370867	-4.90857	Mus musculus	RefSeq	ILMN_214839	ILMN_214839	ATG2B	NM_029654.4	NM_029654.4	NA	76559	118197273	NM_029654.4	Atg2b	NP_083930.5	ILMN_2652518	2900768	S	7390	GTTAAGGACTTAGTGCAGCCCGTTAGTGTCAAGGGCATTGGAAGTGGGCT	12	-	106854482-106854531	12qE	Mus musculus ATG2 autophagy related 2 homolog B (S. cerevisiae) (Atg2b), mRNA.				C630028L02Rik; KIAA4067; 2410024A21Rik; AI503411; AI047755; AW558123; mKIAA4067; C030004M05Rik	C630028L02Rik; AI503411; AI047755; AW558123; mKIAA4067; KIAA4067; 2410024A21Rik; C030004M05Rik
6200209	-0.595931	6.56925	-3.16199	0.0108893	0.0370969	-4.90899	Mus musculus	RefSeq	ILMN_215897	ILMN_215897	MESDC1	NM_030705.4	NM_030705.4	NA	80889	148352326	NM_030705.4	Mesdc1	NP_109630.1	ILMN_2664909	6200209	S	3480	GTCAGTGGAGGGCTTGTTTTTATGACCTTGATTCAAGTGGCTGGTTGGGT				7qD3	Mus musculus mesoderm development candidate 1 (Mesdc1), mRNA.				AW061151	AW061151
5220278	-1.14971	5.91295	-3.15729	0.010974	0.0373607	-4.91697	Mus musculus	RefSeq	ILMN_217611	ILMN_325345	ST7	NM_001083315.1	NM_001083315.1	NA	64213	134032044	NM_001083315.1	St7	NP_001076784.1	ILMN_2729574	5220278	S	2015	CTGAGATTTTAAACTGCTCATGGACTATCAGTTCCTTATTAAAGGCTGGT	6	+	17892867-17892916	6qA2	Mus musculus Suppression of tumorigenicity 7 (St7), transcript variant 2, mRNA.	Penetrating at least one phospholipid bilayer of a membrane. May also refer to the state of being buried in the bilayer with no exposure outside the bilayer. When used to describe a protein, indicates that all or part of the peptide sequence is embedded in the membrane [goid 16021] [evidence IEA]; Double layer of lipid molecules that encloses all cells, and, in eukaryotes, many organelles; may be…			RAY1; Fam4a2; MGC118540; TSG7; 9430001H04Rik; SEN4; HELG	RAY1; Fam4a2; MGC118540; TSG7; 9430001H04Rik; SEN4; HELG
7380167	0.43984	7.95906	3.14638	0.0111732	0.0379583	-4.93547	Mus musculus	RefSeq	ILMN_218352	ILMN_218352	BC003993	NM_030560.3	NM_030560.3	NA	80744	141801912	NM_030560.3	BC003993	NP_085037.2	ILMN_2744789	7380167	S	311	CCCCCCGGGATAGAGGTTACTCTGATTACAGCCGGTCAGACTATGAGCGA	2	-	77769532-77769581	2qC3	Mus musculus cDNA sequence BC003993 (BC003993), mRNA.	A membrane-bounded organelle of eukaryotic cells in which chromosomes are housed and replicated. In most cells, the nucleus contains all of the cell's chromosomes except the organellar chromosomes, and is the site of RNA synthesis and processing. In some species, or in specialized cell types, RNA metabolism or DNA replication may be absent [goid 5634] [evidence IEA]; A ribonucleoprotein complex, …	The process of removing sections of the primary RNA transcript to remove sequences not present in the mature form of the RNA and joining the remaining sections to form the mature form of the RNA [goid 8380] [evidence IEA]; Any process involved in the conversion of a primary mRNA transcript into one or more mature mRNA(s) prior to translation into polypeptide [goid 6397] [evidence IEA]; The chemic…	Interacting selectively with any protein or protein complex (a complex of two or more proteins that may include other nonprotein molecules) [goid 5515] [evidence IEA]	MGC107219; B230213M24; MGC7531; mKIAA1604; RP23-65N20.1; AL022752; AI173004; AA684037; MGC107450	MGC107219; B230213M24; MGC7531; mKIAA1604; RP23-65N20.1; AL022752; AI173004; AA684037; MGC107450
4670041	0.602029	3.56135	3.14322	0.0112315	0.0381313	-4.94083	Mus musculus	RefSeq	ILMN_215193	ILMN_215193	SULT1E1	NM_023135.1	NM_023135.1	NA	20860	12963514	NM_023135.1	Sult1e1	NP_075624.1	ILMN_1216300	4670041	S	1004	CCACTTCCTTGTGTCTGAAATTAGAGTAGTCTGAAATTTATCCTTCAGTT	5	-	88005182-88005231	5qE1	Mus musculus sulfotransferase family 1E, member 1 (Sult1e1), mRNA.	All of the contents of a cell excluding the plasma membrane and nucleus, but including other subcellular structures [goid 5737] [evidence IEA]	The set of physiological processes that allow an embryo or foetus to develop within the body of a female animal. It covers the time from fertilization of a female ovum by a male spermatozoon until birth [goid 7565] [evidence IMP]; The chemical reactions and pathways involving estrogens, C18 steroid hormones that can stimulate the development of female sexual characteristics. Also found in plants …	Interacting selectively with a steroid, any of a large group of substances that have in common a ring system based on 1,2-cyclopentanoperhydrophenanthrene [goid 5496] [evidence IEA]; Catalysis of the transfer of a group, e.g. a methyl group, glycosyl group, acyl group, phosphorus-containing, or other groups, from one compound (generally regarded as the donor) to another compound (generally regard…	Ste	Ste
4250653	0.831855	6.1285	3.13953	0.0113	0.0383437	-4.94709	Mus musculus	RefSeq	ILMN_193260	ILMN_237293	AZIN1	NM_018745.4	NM_018745.4	NA	54375	146134433	NM_018745.4	Azin1	NP_061215.1	ILMN_1238799	4250653	S	4503	GTCTGCTTCTAACCTTGCTTCTGGCACTGAACTATTCTAGCAGAGGCCAG				15qB3.1	Mus musculus antizyme inhibitor 1 (Azin1), mRNA.		The chemical reactions and pathways resulting in the formation of polyamines, any organic compound containing two or more amino groups [goid 6596] [evidence IEA]; The chemical reactions and pathways involving polyamines, any organic compound containing two or more amino groups [goid 6595] [evidence TAS]	Catalysis of a biochemical reaction at physiological temperatures. In biologically catalyzed reactions, the reactants are known as substrates, and the catalysts are naturally occurring macromolecular substances known as enzymes. Enzymes possess specific binding sites for substrates, and are usually composed wholly or largely of protein, but RNA that has catalytic activity (ribozyme) is often also…	1700085L02Rik; Oazi; Oazin; AI414949	1700085L02Rik; Oazi; Oazin; AI414949
3890255	-0.797846	3.62171	-3.13906	0.0113088	0.0383635	-4.94789	Mus musculus	RefSeq	ILMN_223473	ILMN_223473	PDE5A	NM_153422.1	NM_153422.1	NA	242202	23510316	NM_153422.1	Pde5a	NP_700471.1	ILMN_2764541	3890255	S	3154	CGTGGTACCTAATTGCTCTGCTCTTTCTAGGATGGGGAGAACTTGCAGTA	3	+	122558747-122558796	3qG1	Mus musculus phosphodiesterase 5A, cGMP-specific (Pde5a), mRNA.		The chemical reactions and pathways resulting in the breakdown of cyclic GMP, guanosine 3',5'-phosphate [goid 46069] [evidence IDA]; The cascade of processes by which a signal interacts with a receptor, causing a change in the level or activity of a second messenger or other downstream target, and ultimately effecting a change in the functioning of the cell [goid 7165] [evidence IEA]	Catalysis of the hydrolysis of various bonds, e.g. C-O, C-N, C-C, phosphoric anhydride bonds, etc. Hydrolase is the systematic name for any enzyme of EC class 3 [goid 16787] [evidence IEA]; Catalysis of a biochemical reaction at physiological temperatures. In biologically catalyzed reactions, the reactants are known as substrates, and the catalysts are naturally occurring macromolecular substance…	CGB-PDE; Pde5; CN5N; PDE5A1	CGB-PDE; Pde5; CN5N; PDE5A1
1030220	1.02263	4.60426	3.12892	0.0114996	0.0389643	-4.96508	Mus musculus	RefSeq	ILMN_213045	ILMN_213045	BC031748	NM_146261.1	NM_146261.1	NA	245622	22122858	NM_146261.1	BC031748	NP_666373.1	ILMN_2632964	1030220	S	3006	TACCTTGCAGCATTGCTGAGGCCTGTGGTTGGGCTTTAACTTTCGAATGC	X	+	133611784-133611833	XqF1	Mus musculus cDNA sequence BC031748 (BC031748), mRNA.				MGC19245; RP23-272P2.1	MGC19245; RP23-272P2.1
1340717	0.39762	3.46559	3.12563	0.0115622	0.0391401	-4.97066	Mus musculus	RefSeq	ILMN_213984	ILMN_213984	HSD17B11	NM_053262.3	NM_053262.3	NA	114664	118131125	NM_053262.3	Hsd17b11	NP_444492.1	ILMN_2685234	1340717	S	532	ATGATGAAGAATAATCATGGCCACATTGTCACTGTGGCATCAGCAGCAGG	5	-	104437630-104437679	5qE5	Mus musculus hydroxysteroid (17-beta) dehydrogenase 11 (Hsd17b11), mRNA.	All of the contents of a cell excluding the plasma membrane and nucleus, but including other subcellular structures [goid 5737] [evidence IEA]; The space external to the outermost structure of a cell. For cells without external protective or external encapsulating structures this refers to space outside of the plasma membrane. This term covers the host cell environment outside an intracellular pa…	The chemical reactions and pathways resulting in the formation of steroids, compounds with a 1,2,cyclopentanoperhydrophenanthrene nucleus; includes de novo formation and steroid interconversion by modification [goid 6694] [evidence IEA]; The chemical reactions and pathways resulting in the formation of lipids, compounds soluble in an organic solvent but not, or sparingly, in an aqueous solvent [g…	Catalysis of an oxidation-reduction (redox) reaction, a reversible chemical reaction in which the oxidation state of an atom or atoms within a molecule is altered. One substrate acts as a hydrogen or electron donor and becomes oxidized, while the other acts as hydrogen or electron acceptor and becomes reduced [goid 16491] [evidence IEA]; Catalysis of a biochemical reaction at physiological temper…	SDR2; Pan1b; Dhrs8; retSDR2	SDR2; Pan1b; Dhrs8; retSDR2
3360554	1.19635	4.12143	3.11634	0.0117407	0.0396975	-4.98641	Mus musculus	RefSeq	ILMN_219122	ILMN_219122	NELL2	NM_016743.2	NM_016743.2	NA	54003	133922560	NM_016743.2	Nell2	NP_058023.2	ILMN_2711366	3360554	S	2830	GCAGCTGGATAGACTGATGTCGATTATGGATTCGTGGGGCCTGAGGAACA	15	-	95050368-95050417	15qE3-qF1	Mus musculus NEL-like 2 (chicken) (Nell2), mRNA.	The space external to the outermost structure of a cell. For cells without external protective or external encapsulating structures this refers to space outside of the plasma membrane. This term covers the host cell environment outside an intracellular parasite [goid 5576] [evidence IEA]	The attachment of a cell, either to another cell or to an underlying substrate such as the extracellular matrix, via cell adhesion molecules [goid 7155] [evidence IEA]	Interacting selectively with calcium ions (Ca2+) [goid 5509] [evidence IEA]; The action of a molecule that contributes to the structural integrity of a complex or assembly within or outside a cell [goid 5198] [evidence IEA]	A330108N19Rik; mel91; R75516	A330108N19Rik; mel91; R75516
3420692	-0.874176	5.49605	-3.11059	0.0118527	0.0400288	-4.99616	Mus musculus	RefSeq	ILMN_184380	ILMN_239226	NUDT12	NM_026497.2	NM_026497.2	NA	67993	142375040	NM_026497.2	Nudt12	NP_080773.1	ILMN_2635813	3420692	S	1933	CTGACTTTCTGTTCCAGTGGTCGTACTGTTGCAGTGTCACTCCTAGTGTC	17	-	59141121-59141170	17qD	Mus musculus nudix (nucleoside diphosphate linked moiety X)-type motif 12 (Nudt12), mRNA.	A small, membrane-bounded organelle that uses dioxygen (O2) to oxidize organic molecules; contains some enzymes that produce and others that degrade hydrogen peroxide (H2O2) [goid 5777] [evidence IEA]		Catalysis of the hydrolysis of various bonds, e.g. C-O, C-N, C-C, phosphoric anhydride bonds, etc. Hydrolase is the systematic name for any enzyme of EC class 3 [goid 16787] [evidence IEA]; Interacting selectively with magnesium (Mg) ions [goid 287] [evidence IEA]; Interacting selectively with manganese (Mn) ions [goid 30145] [evidence IEA]; Interacting selectively with any metal ion [goid 46872]…	0610016O18Rik	0610016O18Rik
6290619	-0.368746	7.72329	-3.10976	0.0118691	0.0400789	-4.99758	Mus musculus	RefSeq	ILMN_185081	ILMN_185081	ZMYND11	NM_144516.2	NM_144516.2	NA	66505	89337271	NM_144516.2	Zmynd11	NP_653099.2	ILMN_2497068	6290619	S	2155	GAGCTGAATGTAAGAGCGGATGCTTCAGAACAGACTACCTGGCCGTGACC	13	-	9685723-9685772	13qA1	Mus musculus zinc finger, MYND domain containing 11 (Zmynd11), mRNA.	A membrane-bounded organelle of eukaryotic cells in which chromosomes are housed and replicated. In most cells, the nucleus contains all of the cell's chromosomes except the organellar chromosomes, and is the site of RNA synthesis and processing. In some species, or in specialized cell types, RNA metabolism or DNA replication may be absent [goid 5634] [evidence IEA]	Any process that modulates the frequency, rate or extent of DNA-dependent transcription [goid 6355] [evidence IEA]; The synthesis of either RNA on a template of DNA or DNA on a template of RNA [goid 6350] [evidence IEA]	Interacting selectively with zinc (Zn) ions [goid 8270] [evidence IEA]; Interacting selectively with DNA (deoxyribonucleic acid) [goid 3677] [evidence IEA]; Interacting selectively with any protein or protein complex (a complex of two or more proteins that may include other nonprotein molecules) [goid 5515] [evidence IEA]; Interacting selectively with any metal ion [goid 46872] [evidence IEA]	2210402G22Rik	2210402G22Rik
380639	-0.617127	5.88693	-3.1074	0.0119155	0.0402196	-5.00158	Mus musculus	RefSeq	ILMN_220872	ILMN_220872	SERTAD4	NM_198247.1	NM_198247.1	NA	214791	38016191	NM_198247.1	Sertad4	NP_937890.1	ILMN_1229745	380639	S	2776	GTAGGTTGCGGAACGTTATTTTGGAGAAATGGGGCTCGCTTGTCATAGAT	1	-	194671171-194671220	1qH6	Mus musculus SERTA domain containing 4 (Sertad4), mRNA.				C130018M11Rik; 4833404A09	C130018M11Rik; 4833404A09
940725	0.619434	3.58414	3.10613	0.0119405	0.0402987	-5.00373	Mus musculus	RefSeq	ILMN_194107	ILMN_234386	SLC1A2	NM_011393.2	NM_011393.2	NA	20511	133892173	NM_011393.2	Slc1a2	NP_035523.1	ILMN_2642339	940725	S	1962	GGTGGTTGTCAGAACTTTAATGGCCTTCAGATATTCTCTTCCTCAAAGGA	2	+	102618098-102618147	2qE2	Mus musculus solute carrier family 1 (glial high affinity glutamate transporter), member 2 (Slc1a2), transcript variant 3, mRNA.	Penetrating at least one phospholipid bilayer of a membrane. May also refer to the state of being buried in the bilayer with no exposure outside the bilayer. When used to describe a protein, indicates that all or part of the peptide sequence is embedded in the membrane [goid 16021] [evidence IEA]; Penetrating at least one phospholipid bilayer of a plasma membrane. May also refer to the state of b…	The directed movement of substances (such as macromolecules, small molecules, ions) into, out of, within or between cells, or within a multicellular organism [goid 6810] [evidence IEA]; The directed movement of dicarboxylic acids into, out of, within or between cells [goid 6835] [evidence IEA]; The inherent decline of a multicellular organism over time, from the optimal fertility and viability of…	Enables the active transport of a solute across a membrane by a mechanism whereby two or more species are transported together in the same direction in a tightly coupled process not directly linked to a form of energy other than chemiosmotic energy [goid 15293] [evidence IEA]; Catalysis of the transfer of a solute or solutes from one side of a membrane to the other according to the reaction: dica…	Eaat2; MGLT1; 1700091C19Rik; GLT-1; GLT1	Eaat2; MGLT1; 1700091C19Rik; GLT-1; GLT1
7610593	0.86783	4.56669	3.10565	0.0119499	0.0403254	-5.00455	Mus musculus	RefSeq	ILMN_222980	ILMN_222980	LTBR	NM_010736.3	NM_010736.3	NA	17000	145301633	NM_010736.3	Ltbr	NP_034866.1	ILMN_2757582	7610593	S	1768	TAAACATGGCAGAGGAGGGAGCTGGTCCCAGGGTCACTCGCAAGGATATC				6qF3	Mus musculus lymphotoxin B receptor (Ltbr), mRNA.	Penetrating at least one phospholipid bilayer of a membrane. May also refer to the state of being buried in the bilayer with no exposure outside the bilayer. When used to describe a protein, indicates that all or part of the peptide sequence is embedded in the membrane [goid 16021] [evidence IEA]; Double layer of lipid molecules that encloses all cells, and, in eukaryotes, many organelles; may be…	A form of programmed cell death induced by external or internal signals that trigger the activity of proteolytic caspases, whose actions dismantle the cell and result in cell death. Apoptosis begins internally with condensation and subsequent fragmentation of the cell nucleus (blebbing) while the plasma membrane remains intact. Other characteristics of apoptosis include DNA fragmentation and the …	Combining with an extracellular or intracellular messenger to initiate a change in cell activity [goid 4872] [evidence IEA]; Interacting selectively with any protein or protein complex (a complex of two or more proteins that may include other nonprotein molecules) [goid 5515] [evidence IPI]	Tnfrsf3; TNF-R-III; AI256028; Tnfbr; TNFR-RP; Ltar; TNFCR; TNFRrp; TNFR2-RP; CD18; LTbetaR	Tnfrsf3; TNF-R-III; AI256028; Tnfbr; TNFR-RP; Ltar; TNFCR; TNFRrp; TNFR2-RP; CD18; LTbetaR
3710440	0.462119	7.20365	3.10526	0.0119576	0.0403459	-5.00521	Mus musculus	RefSeq	ILMN_218128	ILMN_247046	AFG3L2	NM_027130.1	NM_027130.1	NA	69597	110625760	NM_027130.1	Afg3l2	NP_081406.1	ILMN_2691982	3710440	S	2641	GGGATGGCCTCCATTGCAGCTGAGGGCTTCACAACTGCAGCAACTGCCAG	18	-	67564785-67564834	18qE1	Mus musculus AFG3(ATPase family gene 3)-like 2 (yeast) (Afg3l2), mRNA.	Penetrating at least one phospholipid bilayer of a membrane. May also refer to the state of being buried in the bilayer with no exposure outside the bilayer. When used to describe a protein, indicates that all or part of the peptide sequence is embedded in the membrane [goid 16021] [evidence IEA]; Double layer of lipid molecules that encloses all cells, and, in eukaryotes, many organelles; may be…	The chemical reactions and pathways resulting in the breakdown of a protein by the destruction of the native, active configuration, with or without the hydrolysis of peptide bonds [goid 30163] [evidence IEA]; The hydrolysis of a peptide bond or bonds within a protein [goid 6508] [evidence IEA]; A permanent cessation of all vital functions: the end of life; can be applied to a whole organism or to…	Catalysis of the hydrolysis of various bonds, e.g. C-O, C-N, C-C, phosphoric anhydride bonds, etc. Hydrolase is the systematic name for any enzyme of EC class 3 [goid 16787] [evidence IEA]; Interacting selectively with a nucleotide, any compound consisting of a nucleoside that is esterified with (ortho)phosphate or an oligophosphate at any hydroxyl group on the ribose or deoxyribose moiety [goid …	AW260507; 2310036I02Rik	AW260507; 2310036I02Rik
4260010	-1.07483	4.60696	-3.10485	0.0119657	0.0403591	-5.0059	Mus musculus	RefSeq	ILMN_217084	ILMN_319355	LOC100046744	XM_001475765.1	XM_001475765.1	NA	100046744	149269059	XM_001475765.1	LOC100046744	XP_001475815.1	ILMN_2678921	4260010	S	5095	CCCAGGGTGCCCCTTTCTGCTTATGATCGTGTTAGTGGCAGAACCTCACC					PREDICTED: Mus musculus similar to Serine/arginine repetitive matrix protein 2 (LOC100046744), mRNA.
6020255	-0.642921	3.81162	-3.09371	0.0121879	0.0410259	-5.02479	Mus musculus	RefSeq	ILMN_211864	ILMN_211864	CENTD3	NM_139206.1	NM_139206.1	NA	106952	27885014	NM_139206.1	Centd3	NP_631945.1	ILMN_1243107	6020255	S	5044	ATGTTATTCCGCTTCCTATGTACTGGAACTGCCTTGAGGCCCTAGAGTGG	18	-	38132358-38132407	18qB3	Mus musculus centaurin, delta 3 (Centd3), mRNA.				AI851258; Drag1; mKIAA4097; E030006K04Rik; KIAA4097; Arap3	AI851258; Drag1; mKIAA4097; E030006K04Rik; KIAA4097; Arap3
4880678	-0.489446	3.50884	-3.09108	0.0122411	0.0411834	-5.02926	Mus musculus	RefSeq	ILMN_218029	ILMN_218029	RPL37	NM_026069.2	NM_026069.2	NA	67281	142387412	NM_026069.2	Rpl37	NP_080345.1	ILMN_1223052	4880678	S	390	GGTACTTTAACATCGGTTCAGAGTTCGGTTATATGATTGCTCTGGGATCC	15	+	5068695-5068744	15qA1	Mus musculus ribosomal protein L37 (Rpl37), mRNA.	An intracellular organelle, about 200 A in diameter, consisting of RNA and protein. It is the site of protein biosynthesis resulting from translation of messenger RNA (mRNA). It consists of two subunits, one large and one small, each containing only protein and RNA. Both the ribosome and its subunits are characterized by their sedimentation coefficients, expressed in Svedberg units (symbol: S). H…	The chemical reactions and pathways resulting in the formation of a protein. This is a ribosome-mediated process in which the information in messenger RNA (mRNA) is used to specify the sequence of amino acids in the protein [goid 6412] [evidence IEA]; Any process specifically pertinent to the functioning of integrated living units: cells, tissues, organs, and organisms. A process is a collection …	Interacting selectively with an RNA molecule or a portion thereof [goid 3723] [evidence IEA]; Interacting selectively with ribosomal RNA [goid 19843] [evidence IEA]; Interacting selectively with any metal ion [goid 46872] [evidence IEA]; Interacting selectively with zinc (Zn) ions [goid 8270] [evidence IEA]; The action of a molecule that contributes to the structural integrity of the ribosome [go…	3110005M08Rik	3110005M08Rik
4920458	0.996696	4.88078	3.08086	0.0124496	0.0417866	-5.04659	Mus musculus	RefSeq	ILMN_209276	ILMN_209276	CRKRS	NM_026952.1	NM_026952.1	NA	69131	30794423	NM_026952.1	Crkrs	NP_081228.1	ILMN_1254548	4920458	S	1020	ACCCAGCCCCTATGGCCGAAGGCGATCAAGCAGCCCTTTCCTGAGCAAGA	11	+	98065647-98065696	11qD	Mus musculus Cdc2-related kinase, arginine/serine-rich (Crkrs), mRNA.	A membrane-bounded organelle of eukaryotic cells in which chromosomes are housed and replicated. In most cells, the nucleus contains all of the cell's chromosomes except the organellar chromosomes, and is the site of RNA synthesis and processing. In some species, or in specialized cell types, RNA metabolism or DNA replication may be absent [goid 5634] [evidence IEA]	The process of introducing a phosphate group on to a protein [goid 6468] [evidence IEA]	Interacting selectively with a nucleotide, any compound consisting of a nucleoside that is esterified with (ortho)phosphate or an oligophosphate at any hydroxyl group on the ribose or deoxyribose moiety [goid 166] [evidence IEA]; Catalysis of the reaction: ATP + a protein serine/threonine = ADP + protein serine/threonine phosphate [goid 4674] [evidence IEA]; Catalysis of the transfer of a group, …	AI646528; 1810022J16Rik; MGC141525; Pksc; Crk7	AI646528; 1810022J16Rik; MGC141525; Pksc; Crk7
4730639	0.267517	7.39297	3.0696	0.0126837	0.0425167	-5.0657	Mus musculus	RefSeq	ILMN_215830	ILMN_228456	ASPSCR1	NM_198223.1	NM_198223.1	NA	68938	38016199	NM_198223.1	Aspscr1	NP_937866.1	ILMN_2682865	4730639	S	1374	TGACCCTGTATCCCTGGAGTCTGAGCCAATCGCTGAGGATGGGGCACTGG	11	+	120570462-120570511	11qE2	Mus musculus alveolar soft part sarcoma chromosome region, candidate 1 (human) (Aspscr1), transcript variant 2, mRNA.	Double layer of lipid molecules that encloses all cells, and, in eukaryotes, many organelles; may be a single or double lipid bilayer; also includes associated proteins [goid 16020] [evidence IEA]; Loosely bound to one surface of a membrane, but not integrated into the hydrophobic region [goid 19898] [evidence IDA]; The lipid bilayer surrounding any membrane-bounded vesicle in the cell [goid 1250…	The directed movement of proteins in a cell, including the movement of proteins between specific compartments or structures within a cell, such as organelles of a eukaryotic cell [goid 6886] [evidence IDA]; Any process that modulates the frequency, rate or extent of the import of the hexose monosaccharide glucose into a cell or organelle [goid 46324] [evidence IDA]; Any process involved in the ma…	Interacting selectively with any protein or protein complex (a complex of two or more proteins that may include other nonprotein molecules) [goid 5515] [evidence IPI]	ASPS; ASPC; ASPCR1; TUG; 1190006K01Rik; ASPL; RCC17	ASPS; ASPC; ASPCR1; TUG; 1190006K01Rik; ASPL; RCC17
5490138	0.435413	8.39957	3.06852	0.0127063	0.0425814	-5.06753	Mus musculus	RefSeq	ILMN_223315	ILMN_223315	ENPP4	NM_199016.2	NM_199016.2	NA	224794	84872230	NM_199016.2	Enpp4	NP_950181.2	ILMN_2762380	5490138	S	1465	ATGATATTCATGCGGAGCAGAGCATCCACATCCCGTCCATTCTCCCGTCT	17	-	44236301-44236350	17qB3	Mus musculus ectonucleotide pyrophosphatase/phosphodiesterase 4 (Enpp4), mRNA.	Penetrating at least one phospholipid bilayer of a membrane. May also refer to the state of being buried in the bilayer with no exposure outside the bilayer. When used to describe a protein, indicates that all or part of the peptide sequence is embedded in the membrane [goid 16021] [evidence IEA]; Double layer of lipid molecules that encloses all cells, and, in eukaryotes, many organelles; may be…	The chemical reactions and pathways, including anabolism and catabolism, by which living organisms transform chemical substances. Metabolic processes typically transform small molecules, but also include macromolecular processes such as DNA repair and replication, and protein synthesis and degradation [goid 8152] [evidence IEA]	Catalysis of the hydrolysis of various bonds, e.g. C-O, C-N, C-C, phosphoric anhydride bonds, etc. Hydrolase is the systematic name for any enzyme of EC class 3 [goid 16787] [evidence IEA]; Catalysis of a biochemical reaction at physiological temperatures. In biologically catalyzed reactions, the reactants are known as substrates, and the catalysts are naturally occurring macromolecular substance…	mKIAA0879; AA986363; AI195364; Gm90; 4933413N07Rik; MGC29265	mKIAA0879; AA986363; AI195364; Gm90; 4933413N07Rik; MGC29265
6860372	0.94783	3.9998	3.06714	0.0127355	0.0426624	-5.06987	Mus musculus	RefSeq	ILMN_214258	ILMN_214258	5730507A09RIK	NM_183087.3	NM_183087.3	NA	70638	146198608	NM_183087.3	5730507A09Rik	NP_898910.1	ILMN_2646045	6860372	S	1079	TTTCTCTCCTGCCCTTAGTGAGCTCTGGTCGCTTCAGGGGTATAGCACCT				7qC	Mus musculus RIKEN cDNA 5730507A09 gene (5730507A09Rik), mRNA.	Penetrating at least one phospholipid bilayer of a membrane. May also refer to the state of being buried in the bilayer with no exposure outside the bilayer. When used to describe a protein, indicates that all or part of the peptide sequence is embedded in the membrane [goid 16021] [evidence IEA]; Double layer of lipid molecules that encloses all cells, and, in eukaryotes, many organelles; may be…			AW047451	AW047451
6040747	-0.749102	3.99038	-3.06445	0.0127922	0.0428468	-5.07443	Mus musculus	RefSeq	ILMN_217400	ILMN_217400	RASSF7	NM_025886.3	NM_025886.3	NA	66985	118403309	NM_025886.3	Rassf7	NP_080162.3	ILMN_2778094	6040747	S	1253	ACAGGACTCTTTCCCTAAAGCTAAGCTGTCCTGCGGTTTCTGCTTCAGGG	7	+	148404285-148404334	7qF5	Mus musculus Ras association (RalGDS/AF-6) domain family (N-terminal) member 7 (Rassf7), mRNA.		The cascade of processes by which a signal interacts with a receptor, causing a change in the level or activity of a second messenger or other downstream target, and ultimately effecting a change in the functioning of the cell [goid 7165] [evidence IEA]		2400009B11Rik; AW210608	2400009B11Rik; AW210608
4260114	0.345449	8.14623	3.06377	0.0128066	0.042881	-5.07558	Mus musculus	RefSeq	ILMN_186306	ILMN_186306	ZBTB5	NM_173399.2	NM_173399.2	NA	230119	34328403	NM_173399.2	Zbtb5	NP_775575.2	ILMN_1248222	4260114	S	4029	CGGGGACTGGGGACCTGACTTTTGACTTTTAGCCTTAATTCTAGCCCGGC	4	-	45004227-45004276	4qB1	Mus musculus zinc finger and BTB domain containing 5 (Zbtb5), mRNA.	A membrane-bounded organelle of eukaryotic cells in which chromosomes are housed and replicated. In most cells, the nucleus contains all of the cell's chromosomes except the organellar chromosomes, and is the site of RNA synthesis and processing. In some species, or in specialized cell types, RNA metabolism or DNA replication may be absent [goid 5634] [evidence IEA]; The living contents of a cell…	Any process that modulates the frequency, rate or extent of DNA-dependent transcription [goid 6355] [evidence IEA]; The synthesis of either RNA on a template of DNA or DNA on a template of RNA [goid 6350] [evidence IEA]	Interacting selectively with zinc (Zn) ions [goid 8270] [evidence IEA]; Interacting selectively with DNA (deoxyribonucleic acid) [goid 3677] [evidence IEA]; Interacting selectively with any metal ion [goid 46872] [evidence IEA]; Interacting selectively with any nucleic acid [goid 3676] [evidence IEA]; Interacting selectively with any protein or protein complex (a complex of two or more proteins t…	5930421I10; mKIAA0354; KIAA0354; AI646847; 9430083K24Rik	5930421I10; mKIAA0354; KIAA0354; AI646847; 9430083K24Rik
[truncated: 36 more rows]

## Sheet: Plasticity_candidates_0.05
ID	logFC	AveExpr	t	P.Value	adj.P.Val	B	Species	Source	Search_Key	Transcript	ILMN_Gene	Source_Reference_ID	RefSeq_ID	Unigene_ID	Entrez_Gene_ID	GI	Accession	Symbol	Protein_Product	Probe_Id	Array_Address_Id	Probe_Type	Probe_Start	Probe_Sequence	Chromosome	Probe_Chr_Orientation	Probe_Coordinates	Cytoband	Definition	Ontology_Component	Ontology_Process	Ontology_Function	Synonyms	Obsolete_Probe_Id
[truncated: 333 more rows]

## Sheet: Differentiation_PATHWAYS
Ingenuity Canonical Pathways	-log(p-value)	Ratio	Molecules
Role of Macrophages, Fibroblasts and Endothelial Cells in Rheumatoid Arthritis	3.27E00	4.46E-02	RAF1,RELA,NFKBIE,LRP6,RAC1,PDGFC,WNT8B,NFATC1,ROCK2,VEGFA,TRAF2,MAP2K3,LTBR,MAPKAPK2,TNFSF13B
B Cell Activating Factor Signaling	2.97E00	1.11E-01	RELA,TRAF2,NFKBIE,TNFSF13B,NFATC1
[truncated: 44 more rows]

## Sheet: Plasticity_PATHWAYS
Ingenuity Canonical Pathways	-log(p-value)	Ratio	Molecules
[truncated: 16 more rows]

## Sheet: Differentiation_UPSTREAM
Upstream Regulator	Log Ratio	Molecule Type	Predicted Activation State	Activation z-score	p-value of overlap	Target molecules in dataset	Mechanistic Network
[truncated: 233 more rows]

[truncated: 2 more sheets: Plasticity_UPSTREAM, Key]
